# Supplementary material for: RNA-Sequencing Reveals Heat Shock 70-kDa Protein 6 (HSPA6) as a Novel Thymoquinone-Upregulated Gene That Inhibits Growth, Migration, and Invasion of Triple-Negative Breast Cancer Cells
Source: Front Oncol. 2021 May 4;11:667995. doi: 10.3389/fonc.2021.667995 (PMC8129564; doi:10.3389/fonc.2021.667995)
Supplement: Supplementary file 2 [file Table_1.xls]

## Sheet: Gene_expr_diff
Supplementary table 1. List of differernt expressed genes by TQ
Geneid	Chr	Start	End	Strand	Length	Test1	Test2	Control1	Control2	logFC	logCPM	F	PValue	FDR
HSPA6	1	161524540	161526910	+	2371	31	48	0	0	8.29781	0.332028	73.4313	8.19e-08	5.39e-05
SNORD3A	17;17;17	19188016;19188016;19188016	19188714;19188232;19188233	+;+;+	699	146.75	128.33	29	23	2.34867	2.2619	83.8328	1.92e-08	2.13e-05
KB-1471A8.1	8;8;8;8;8	119867419;119872478;119872821;119873136;119874287	119867649;119872523;119874488;119873311;119874483	-;-;-;-;-	1945	20	17.5	4	3	2.33136	-0.404804	18.7595	0.000350776	0.0242807
HMOX1	22;22;22;22;22;22;22;22;22;22;22;22;22;22	35380361;35380835;35380934;35381093;35383106;35383106;35383106;35386685;35386685;35386685;35387040;35389864;35389864;35393468	35380480;35381196;35381196;35381329;35383226;35383226;35383226;35387176;35386908;35387101;35387176;35390293;35389963;35394214	+;+;+;+;+;+;+;+;+;+;+;+;+;+	2405	6872	6891	1225	1427	2.32978	7.88099	276.742	7.05e-13	1.02e-08
OSGIN1	16;16;16;16;16;16;16;16;16;16;16;16;16;16;16;16;16;16;16;16;16;16;16;16;16;16;16;16;16;16;16;16;16;16;16;16	83948282;83948814;83949037;83949067;83949067;83949403;83951128;83953222;83953239;83953240;83953262;83954113;83956988;83957640;83957640;83957640;83957640;83957640;83957640;83959260;83959260;83959260;83959260;83959260;83960569;83960569;83960569;83960569;83960569;83960981;83960981;83960981;83960981;83965062;83965062;83965062	83948332;83948901;83949107;83949506;83949506;83949506;83951287;83953370;83953370;83953370;83953370;83954548;83957121;83957738;83957738;83957738;83957738;83957738;83957650;83959396;83959396;83959396;83959396;83959396;83960732;83960760;83960760;83960760;83960760;83961253;83961072;83961072;83961072;83966332;83966332;83966331	+;+;+;+;+;+;+;+;+;+;+;+;+;+;+;+;+;+;+;+;+;+;+;+;+;+;+;+;+;+;+;+;+;+;+;+	3460	162	160	52	49	1.62512	2.63226	51.1843	7.85e-07	0.000344335
RP11-543P15.1	12	3211663	3211917	-	255	610.08	597.83	216.83	187	1.53676	4.54134	77.5796	3.52e-08	3.14e-05
MTND6P3	5	94568929	94569470	-	542	160.06	149.63	75.88	28.25	1.52953	2.59694	27.0911	4.85e-05	0.00626199
AP001596.6	21;21;21;21;21;21;21;21;21;21;21;21;21;21	26378552;26382525;26387001;26387724;26387726;26390136;26413052;26416509;26416710;26417943;26470560;26470751;26470751;26470751	26378704;26382596;26387058;26387782;26387782;26390265;26413266;26416661;26416936;26418087;26470646;26471198;26471698;26471102	+;+;+;+;+;+;+;+;+;+;+;+;+;+	2247	31	42	14	11	1.4976	0.617269	15.5267	0.000860384	0.0449356
FOS	14;14;14;14;14;14;14;14;14;14;14;14;14;14;14;14;14;14;14;14;14;14;14;14;14;14	75278774;75278826;75278828;75278828;75278828;75278977;75279237;75279643;75279670;75279877;75279877;75279877;75279877;75279906;75279978;75280193;75280560;75280560;75280560;75280560;75280570;75280783;75280783;75280783;75280783;75280783	75279123;75279123;75279128;75279123;75279123;75279123;75279531;75280128;75280128;75280128;75280374;75280128;75280128;75280128;75280128;75280667;75280789;75280667;75280607;75280667;75280667;75281587;75281684;75281157;75281636;75282230	+;+;+;+;+;+;+;+;+;+;+;+;+;+;+;+;+;+;+;+;+;+;+;+;+;+	3238	111	114	38	43	1.42565	2.17838	32.8513	1.52e-05	0.00289318
ATP5EP2	13	27945206	27945590	+	385	44.5	45.5	15.5	17	1.4159	0.912194	18.3946	0.000386519	0.0254171
CA11	19;19;19;19;19;19;19;19;19;19;19;19;19;19;19;19;19	48637942;48638015;48638016;48638022;48638240;48638240;48638888;48638888;48638888;48639305;48639305;48639549;48639788;48640095;48644427;48645403;48645566	48638144;48638144;48638144;48638144;48638293;48638385;48639053;48639138;48639053;48639459;48639459;48639621;48639883;48640280;48644569;48645477;48646312	-;-;-;-;-;-;-;-;-;-;-;-;-;-;-;-;-	2075	377.5	621.5	181	207	1.34058	4.34637	31.9493	1.81e-05	0.00326609
PALM3	19;19;19;19;19;19;19;19;19;19;19;19;19;19;19	14053365;14054895;14055135;14055380;14055380;14055380;14056429;14056429;14056429;14056662;14056662;14056662;14057351;14057351;14059115	14055226;14055226;14055226;14055425;14055425;14055425;14056513;14056513;14056513;14056804;14056907;14056804;14057599;14057431;14059159	-;-;-;-;-;-;-;-;-;-;-;-;-;-;-	2533	496	618	231.5	224	1.2562	4.51382	43.227	2.54e-06	0.000817067
RP4-706A16.3	1	77129114	77129668	+	555	124.67	96.83	57.67	32	1.25189	2.192	22.2446	0.000145628	0.0140512
RPL13AP25	13	54440704	54441315	-	612	432.67	426.67	202.33	151.4	1.23837	4.13505	43.5371	2.42e-06	0.000796548
TRIM16L	17;17;17;17;17;17;17;17;17;17;17;17;17;17;17;17;17;17;17;17;17;17;17;17;17;17;17;17;17;17;17;17;17;17;17;17;17;17;17;17;17;17;17;17;17;17;17;17;17;17;17;17;17;17;17;17;17;17;17;17;17;17;17;17;17;17;17;17;17;17;17;17;17;17	18697998;18698008;18698010;18698028;18699154;18699154;18699154;18699215;18699360;18699360;18699360;18701357;18701357;18701357;18701357;18701357;18701357;18704129;18704619;18704619;18704658;18705063;18705063;18721777;18722023;18722118;18722119;18722121;18722123;18722237;18722237;18722237;18722237;18722237;18722247;18723770;18723770;18727525;18727525;18727525;18727525;18727525;18727525;18727525;187…	18698114;18698114;18699275;18698114;18699275;18699275;18699275;18699275;18699457;18699457;18699457;18701445;18701445;18701445;18701445;18701445;18701445;18704547;18704765;18704765;18704765;18705164;18705164;18721862;18722332;18722332;18722332;18722332;18722332;18722332;18722332;18722245;18722332;18722332;18722332;18723831;18723831;18727702;18727758;18727758;18727758;18727758;18727758;18727758;187…	+;+;+;+;+;+;+;+;+;+;+;+;+;+;+;+;+;+;+;+;+;+;+;+;+;+;+;+;+;+;+;+;+;+;+;+;+;+;+;+;+;+;+;+;+;+;+;+;+;+;+;+;+;+;+;+;+;+;+;+;+;+;+;+;+;+;+;+;+;+;+;+;+;+	4329	881.5	767	340	350	1.20498	5.07441	57.723	3.3e-07	0.000190814
RPL41P1	20	21755270	21755350	+	81	421.96	448.33	170.57	204.67	1.16936	4.17802	38.0465	5.95e-06	0.00134608
FOSB	19;19;19;19;19;19;19;19;19;19;19;19;19;19;19;19;19;19;19;19;19;19;19;19;19;19;19;19;19;19;19;19;19;19;19;19;19;19;19;19;19;19	45467995;45467995;45467995;45467995;45467995;45467995;45467996;45468435;45469876;45469886;45469913;45470265;45470629;45470629;45470629;45470629;45470629;45470629;45470746;45470746;45471079;45471194;45471194;45471194;45471194;45471194;45471194;45471194;45472551;45472551;45472551;45472551;45472551;45472551;45472551;45472551;45472551;45472551;45472551;45472847;45472847;45472848	45468712;45468712;45468712;45468712;45468712;45468712;45468712;45468712;45470949;45472067;45470949;45470412;45470949;45470949;45472081;45470949;45470949;45470949;45470949;45470949;45471301;45471301;45471301;45471301;45471301;45471301;45471301;45471301;45472553;45473067;45472706;45475179;45472706;45475178;45475178;45475178;45475178;45472706;45475178;45474597;45473040;45473012	+;+;+;+;+;+;+;+;+;+;+;+;+;+;+;+;+;+;+;+;+;+;+;+;+;+;+;+;+;+;+;+;+;+;+;+;+;+;+;+;+;+	5553	124	123	48	60	1.14402	2.38833	22.8861	0.000124944	0.0124507
RPL37P2	11	67682772	67683058	-	287	232	179.5	96.33	83.33	1.14045	3.10159	30.8286	2.25e-05	0.00378136
TXNRD1	12;12;12;12;12;12;12;12;12;12;12;12;12;12;12;12;12;12;12;12;12;12;12;12;12;12;12;12;12;12;12;12;12;12;12;12;12;12;12;12;12;12;12;12;12;12;12;12;12;12;12;12;12;12;12;12;12;12;12;12;12;12;12;12;12;12;12;12;12;12;12;12;12;12;12;12;12;12;12;12;12;12;12;12;12;12;12;12;12;12;12;12;12;12;12;12;12;12;12;12;12;12;12;12;12;12;12;12;12;12;12;12;12;12;12;12;12;12;12;12;12;12;12;12;12;12;12;12;12;12;12;12;12;…	104215779;104215779;104224816;104251527;104251527;104251527;104251546;104258019;104258019;104258019;104258019;104276605;104282882;104284276;104286002;104286682;104286682;104286682;104286682;104286881;104286925;104286990;104286995;104287022;104287024;104287032;104287048;104287049;104287057;104287322;104287368;104288718;104288895;104288931;104288931;104288931;104288931;104288931;104288931;104288931…	104215893;104215893;104224901;104251678;104251678;104251678;104251678;104258268;104258079;104258079;104258079;104276686;104282976;104284406;104286160;104287431;104287109;104287346;104287109;104287346;104287109;104287109;104287109;104287109;104287350;104287109;104287109;104287109;104287109;104287431;104287431;104289040;104289040;104289040;104289040;104289040;104289403;104289040;104289040;104289040…	+;+;+;+;+;+;+;+;+;+;+;+;+;+;+;+;+;+;+;+;+;+;+;+;+;+;+;+;+;+;+;+;+;+;+;+;+;+;+;+;+;+;+;+;+;+;+;+;+;+;+;+;+;+;+;+;+;+;+;+;+;+;+;+;+;+;+;+;+;+;+;+;+;+;+;+;+;+;+;+;+;+;+;+;+;+;+;+;+;+;+;+;+;+;+;+;+;+;+;+;+;+;+;+;+;+;+;+;+;+;+;+;+;+;+;+;+;+;+;+;+;+;+;+;+;+;+;+	6708	28024.8	20452.5	10572	10574.5	1.13671	9.9592	87.0042	1.43e-08	1.88e-05
MTCO3P12	1	634376	634922	+	547	1869.25	1724.58	975.92	626.83	1.12336	6.22393	45.8713	1.69e-06	0.000628177
RPS13P2	1	52772194	52772648	-	455	62.5	59.5	29.5	25	1.11204	1.41014	15.4015	0.000892425	0.0459456
PTGDR2	11;11	60850940;60855869	60853731;60855971	-;-	2895	127.5	102.5	59	44	1.10595	2.29021	21.3247	0.000182213	0.0161695
GCLM	1;1;1;1;1;1;1;1;1;1;1;1;1;1;1;1;1;1;1;1;1	93885205;93887034;93894614;93894614;93894644;93896618;93896618;93896618;93897839;93897839;93897839;93901585;93901585;93901585;93904266;93904523;93904523;93908665;93908665;93909038;93909038	93889159;93889159;93894728;93894728;93894728;93896820;93896820;93896820;93897898;93897898;93897898;93901669;93901669;93901669;93904588;93904588;93904588;93908924;93908790;93909456;93909410	-;-;-;-;-;-;-;-;-;-;-;-;-;-;-;-;-;-;-;-;-	5420	1646	1078	713.5	513	1.09086	5.81775	40.8767	3.71e-06	0.000992962
ABCC2	10;10;10;10;10;10;10;10;10;10;10;10;10;10;10;10;10;10;10;10;10;10;10;10;10;10;10;10;10;10;10;10;10;10;10;10;10;10;10;10;10;10;10	99782732;99782763;99784608;99784608;99792234;99792234;99792289;99793551;99793551;99793551;99793892;99793892;99793892;99794413;99794413;99794413;99797097;99797097;99799207;99800386;99804019;99805382;99807384;99808083;99810134;99811536;99813018;99817308;99818790;99819089;99830307;99830716;99831611;99831977;99834380;99836091;99841967;99843799;99844322;99845624;99846961;99850602;99851502	99782877;99782877;99784781;99784781;99792359;99792359;99792359;99793685;99793685;99793685;99793999;99793999;99793999;99794468;99794623;99794468;99798096;99797331;99799370;99800563;99804273;99805447;99807521;99808229;99810218;99811602;99813144;99817484;99818957;99819269;99830433;99830851;99831830;99832131;99834535;99836290;99842093;99843900;99844465;99845782;99847127;99850796;99852192	+;+;+;+;+;+;+;+;+;+;+;+;+;+;+;+;+;+;+;+;+;+;+;+;+;+;+;+;+;+;+;+;+;+;+;+;+;+;+;+;+;+;+	6232	110	103	50	47	1.08526	2.19499	20.7974	0.000207706	0.0173692
SLA2	20;20;20;20;20;20;20;20;20;20;20;20;20;20;20;20	36612318;36612519;36614305;36614305;36615225;36615225;36632595;36632595;36633543;36633543;36634490;36634490;36641245;36641245;36645837;36645837	36613986;36613986;36614387;36614437;36615374;36615374;36632698;36632698;36633629;36633629;36634589;36634589;36641378;36641378;36645881;36646216	-;-;-;-;-;-;-;-;-;-;-;-;-;-;-;-	2757	347	253.5	156	127.5	1.02609	3.67392	28.2569	3.79e-05	0.005427
HSPA1B	6	31827735	31830255	+	2521	6215.67	7115.64	3273.02	3115.94	1.02532	8.15659	55.936	4.15e-07	0.000225154
HSPA1A	6;6;6	31815464;31815543;31816327	31817946;31815831;31817946	+;+;+	2483	2129.97	2424.52	1046.53	1159.61	1.00693	6.61395	44.2505	2.17e-06	0.000746901
CTD-2287O16.1	5	116051917	116052289	-	373	142.5	142	70.5	67	1.0026	2.63242	20.6671	0.000214597	0.0178423
CTC-432M15.3	5;5;5;5;5;5;5;5;5;5;5;5;5;5;5;5;5;5;5;5;5;5;5;5;5;5;5;5;5	131425891;131428902;131430859;131433430;131439581;131442349;131446483;131453054;131455801;131461705;131464041;131472587;131479513;131489546;131492582;131495553;131498443;131504626;131505364;131508071;131510314;131521390;131548047;131561978;131592383;131603271;131604623;131744564;131796830	131427291;131429216;131431349;131433658;131439715;131442537;131446703;131453177;131456012;131462088;131464281;131472744;131479753;131489654;131492785;131495660;131498607;131504778;131505522;131508207;131510491;131521521;131548190;131562047;131592466;131603327;131604693;131744690;131796983	-;-;-;-;-;-;-;-;-;-;-;-;-;-;-;-;-;-;-;-;-;-;-;-;-;-;-;-;-	6393	71	42	116.75	100.83	-1.00308	2.29123	16.5927	0.000633829	0.0355134
RB1CC1	8;8;8;8;8;8;8;8;8;8;8;8;8;8;8;8;8;8;8;8;8;8;8;8;8;8;8;8;8;8;8;8;8;8;8;8;8;8;8;8;8;8;8;8;8;8;8;8;8;8;8;8;8;8;8;8;8;8;8;8;8;8;8;8;8;8;8;8;8;8;8;8;8;8;8;8;8;8;8;8;8;8;8;8;8;8	52622456;52622459;52623329;52623584;52623714;52624717;52624717;52624717;52624717;52628032;52628032;52628041;52628041;52630470;52630470;52630470;52630470;52634921;52634921;52634921;52634921;52636015;52636015;52636015;52636015;52642351;52642351;52642351;52642704;52642704;52642704;52645702;52645702;52656008;52656008;52657885;52657998;52657998;52657998;52658873;52658873;52658873;52660596;52660596;526…	52623859;52623859;52623471;52623727;52623859;52624787;52624787;52624787;52624787;52628168;52628168;52628168;52628168;52630528;52630528;52630528;52630528;52634968;52634968;52634968;52634968;52636034;52636069;52636069;52636069;52642591;52642591;52642591;52643243;52642812;52642812;52645867;52645867;52657908;52657908;52657908;52658124;52658124;52658124;52658976;52658976;52658976;52660657;52660657;526…	-;-;-;-;-;-;-;-;-;-;-;-;-;-;-;-;-;-;-;-;-;-;-;-;-;-;-;-;-;-;-;-;-;-;-;-;-;-;-;-;-;-;-;-;-;-;-;-;-;-;-;-;-;-;-;-;-;-;-;-;-;-;-;-;-;-;-;-;-;-;-;-;-;-;-;-;-;-;-;-;-;-;-;-;-;-	7615	288	185	603.14	311	-1.00422	4.33036	18.2507	0.000401709	0.0259443
MAML2	11;11;11;11;11;11;11;11;11	95976598;95978755;95985531;95985531;95991520;95991520;96091892;96091892;96341383	95979963;95979963;95985642;95985642;95991723;95991723;96093517;96093520;96343180	-;-;-;-;-;-;-;-;-	7109	95.5	82.5	184	162.5	-1.00957	2.95049	23.8052	0.000100752	0.0107175
MIS18BP1	14;14;14;14;14;14;14;14;14;14;14;14;14;14;14;14;14;14;14;14;14;14;14;14;14;14;14;14;14;14;14;14;14;14;14;14;14;14;14;14;14;14;14;14;14;14;14;14;14;14;14;14;14;14;14;14;14;14;14;14;14;14;14;14	45203190;45203837;45204380;45204399;45204399;45206083;45206083;45206083;45210111;45210380;45210463;45217019;45217019;45217019;45218282;45218282;45218282;45223918;45223918;45223918;45226743;45226826;45227663;45227663;45227687;45227803;45231141;45231141;45231141;45231141;45232509;45232509;45232573;45232733;45232733;45232733;45232733;45235814;45235814;45235814;45237648;45237648;45237648;45237648;452…	45204212;45204212;45204453;45204453;45204453;45206444;45206274;45206170;45210528;45210528;45210528;45217179;45217179;45217179;45218432;45218454;45218454;45224124;45224045;45224746;45226836;45226836;45227814;45227814;45227814;45227814;45231441;45231298;45231298;45231298;45232627;45232627;45232627;45232820;45232820;45232820;45232820;45235944;45235944;45235944;45237721;45237721;45237721;45237721;452…	-;-;-;-;-;-;-;-;-;-;-;-;-;-;-;-;-;-;-;-;-;-;-;-;-;-;-;-;-;-;-;-;-;-;-;-;-;-;-;-;-;-;-;-;-;-;-;-;-;-;-;-;-;-;-;-;-;-;-;-;-;-;-;-	6250	306.5	173	610	322.5	-1.01857	4.3541	17.8601	0.000446377	0.0281485
GOLGA8A	15;15;15;15;15;15;15;15;15;15;15;15;15;15;15;15;15;15;15;15;15;15;15;15;15;15;15;15;15;15;15;15;15;15;15;15;15;15;15;15;15;15;15;15;15;15;15;15;15;15;15;15;15;15;15;15;15;15;15;15;15;15	34379068;34379071;34381411;34381701;34381701;34381701;34381968;34381968;34381968;34382151;34382151;34382151;34382386;34382386;34382386;34382797;34382797;34382797;34383441;34383441;34383441;34383746;34383746;34383746;34383961;34383961;34383961;34385048;34385048;34385048;34385254;34385254;34385254;34385427;34385427;34385427;34385740;34385740;34385740;34386625;34386625;34386625;34386958;34387833;343…	34381613;34381613;34381613;34381856;34381856;34381856;34382068;34382068;34382068;34382251;34382251;34382251;34382529;34382529;34382529;34383053;34383053;34383053;34383528;34383528;34383528;34383853;34383853;34383853;34384047;34384047;34384047;34385157;34385157;34385157;34385338;34385338;34385338;34385474;34385474;34385474;34385778;34385778;34385778;34386741;34386911;34387952;34387380;34387952;343…	-;-;-;-;-;-;-;-;-;-;-;-;-;-;-;-;-;-;-;-;-;-;-;-;-;-;-;-;-;-;-;-;-;-;-;-;-;-;-;-;-;-;-;-;-;-;-;-;-;-;-;-;-;-;-;-;-;-;-;-;-;-	6750	147.48	112.73	282.75	226.55	-1.02073	3.49402	26.9996	4.94e-05	0.00632956
RP1-317E23.3	1;1;1;1;1;1;1;1;1	25816749;25816750;25817562;25817562;25818223;25818403;25818491;25819644;25819712	25816880;25816880;25817713;25817713;25818424;25818424;25820797;25819772;25819743	-;-;-;-;-;-;-;-;-	2793	327	270.5	531	638	-1.02368	4.69024	35.0233	1.02e-05	0.00204091
C1QTNF1	17;17;17;17;17;17;17;17;17;17;17;17;17;17;17;17;17;17;17;17;17;17;17;17;17;17;17;17;17;17;17;17;17;17;17;17;17;17;17;17;17;17;17;17	79022814;79022934;79022971;79024070;79024169;79024171;79024236;79024261;79024862;79025663;79034185;79034317;79041726;79043593;79043955;79043955;79043955;79043955;79043955;79043955;79043955;79043955;79046555;79046555;79046555;79046555;79046555;79046555;79046555;79046555;79046555;79046555;79046901;79047538;79047538;79047538;79047538;79047538;79047538;79047538;79047538;79047538;79047538;79047538	79023088;79023088;79023088;79024494;79024494;79024494;79024494;79024494;79025052;79025935;79034533;79034533;79041835;79044123;79044123;79044123;79044123;79044123;79044123;79044123;79044123;79044123;79046694;79046694;79046694;79046694;79046694;79046694;79046694;79046694;79046694;79046694;79047209;79048466;79048247;79048316;79048247;79049788;79049787;79049787;79048475;79048247;79049787;79048247	+;+;+;+;+;+;+;+;+;+;+;+;+;+;+;+;+;+;+;+;+;+;+;+;+;+;+;+;+;+;+;+;+;+;+;+;+;+;+;+;+;+;+;+	4854	72.5	71	132	151	-1.02743	2.66118	21.3006	0.0001833	0.0161695
MBD6	12;12;12;12;12;12;12;12;12;12;12;12;12;12;12;12;12;12;12;12;12;12;12;12;12;12;12;12;12;12;12;12;12;12;12;12;12;12;12;12;12;12;12;12;12;12;12;12;12;12;12;12;12;12;12;12;12;12;12;12;12;12;12;12;12;12;12;12;12	57520710;57520965;57521048;57521680;57522744;57522840;57522842;57523063;57524029;57524029;57524029;57524029;57524029;57524029;57524029;57524029;57524280;57524280;57524280;57524280;57524280;57524280;57524280;57524319;57524630;57524630;57524720;57524720;57524720;57524720;57524720;57524720;57524720;57524720;57524953;57524953;57524953;57524953;57524953;57524953;57525348;57525348;57525348;57526311;575…	57520743;57521249;57521249;57521967;57523011;57523011;57523011;57523347;57524092;57524092;57524416;57524092;57524092;57524092;57524092;57524092;57524416;57524416;57524416;57524416;57524416;57524416;57524416;57524416;57524822;57524764;57524822;57524766;57524822;57524742;57524822;57524822;57524765;57524822;57525091;57525115;57525115;57524956;57525115;57525115;57525455;57526388;57525414;57526388;575…	+;+;+;+;+;+;+;+;+;+;+;+;+;+;+;+;+;+;+;+;+;+;+;+;+;+;+;+;+;+;+;+;+;+;+;+;+;+;+;+;+;+;+;+;+;+;+;+;+;+;+;+;+;+;+;+;+;+;+;+;+;+;+;+;+;+;+;+;+	5646	323	234.5	454	638	-1.03292	4.59127	28.4042	3.67e-05	0.00531565
RICTOR	5;5;5;5;5;5;5;5;5;5;5;5;5;5;5;5;5;5;5;5;5;5;5;5;5;5;5;5;5;5;5;5;5;5;5;5;5;5;5;5;5;5;5;5;5;5;5;5;5;5;5;5;5;5;5;5;5;5;5;5;5;5;5;5;5;5;5;5;5;5;5;5;5;5;5;5;5;5;5;5;5;5;5;5;5;5;5;5;5;5;5;5;5;5;5;5;5;5;5;5;5;5;5;5;5;5;5;5;5;5;5;5;5;5;5;5;5;5;5;5;5;5;5;5;5;5;5;5;5;5;5;5;5;5;5;5;5;5;5;5;5;5;5;5;5;5;5;5;5;5;5;5;5;5;5;5;5;5;5	38937919;38940015;38940020;38942224;38942833;38942833;38942833;38942833;38944446;38944446;38944446;38944913;38944913;38944913;38945491;38945491;38945491;38946468;38946468;38946468;38947264;38947264;38947264;38949356;38949712;38949712;38949712;38952196;38952196;38952196;38952985;38952985;38952985;38953461;38953461;38953461;38954699;38954774;38954774;38954774;38955595;38955595;38955595;38955595;389…	38942378;38942378;38942378;38942378;38943247;38942971;38942971;38942971;38944569;38944569;38944569;38945068;38945068;38945068;38945724;38945610;38945724;38946552;38946552;38946552;38947441;38947441;38947441;38949427;38950720;38950720;38950720;38952425;38952425;38952425;38953091;38953091;38953091;38953553;38953553;38953553;38954909;38954861;38954861;38954861;38955704;38955704;38955704;38955704;389…	-;-;-;-;-;-;-;-;-;-;-;-;-;-;-;-;-;-;-;-;-;-;-;-;-;-;-;-;-;-;-;-;-;-;-;-;-;-;-;-;-;-;-;-;-;-;-;-;-;-;-;-;-;-;-;-;-;-;-;-;-;-;-;-;-;-;-;-;-;-;-;-;-;-;-;-;-;-;-;-;-;-;-;-;-;-;-;-;-;-;-;-;-;-;-;-;-;-;-;-;-;-;-;-;-;-;-;-;-;-;-;-;-;-;-;-;-;-;-;-;-;-;-;-;-;-;-;-	13550	154.5	88.5	290.5	187	-1.03325	3.39366	19.6387	0.000278785	0.0207896
DOCK11	X;X;X;X;X;X;X;X;X;X;X;X;X;X;X;X;X;X;X;X;X;X;X;X;X;X;X;X;X;X;X;X;X;X;X;X;X;X;X;X;X;X;X;X;X;X;X;X;X;X;X;X;X;X;X;X;X;X;X;X;X;X;X;X;X;X;X;X;X;X;X;X;X;X;X;X;X;X;X;X;X;X;X;X;X;X;X;X;X;X;X;X;X;X;X;X;X;X;X;X;X;X;X;X;X;X;X;X;X;X;X;X;X;X;X;X;X;X;X;X;X;X;X;X;X;X;X;X;X;X;X;X;X;X;X;X;X;X;X;X;X;X;X;X;X;X;X;X;X;X;X;X;X;X;X;X;X;X	118495898;118495909;118542725;118542725;118542926;118542926;118543511;118543511;118545323;118545323;118546021;118546021;118546111;118561383;118561383;118561383;118566005;118566005;118566005;118566574;118566574;118566574;118568079;118568079;118568079;118572323;118572323;118572323;118573806;118573806;118573806;118578525;118578525;118578525;118580097;118580097;118580097;118584735;118584735;118584735…	118496073;118496073;118542841;118542841;118543015;118543015;118543593;118543593;118545392;118545392;118546116;118546116;118546116;118561517;118561517;118561517;118566182;118566182;118566182;118566653;118566653;118566653;118568162;118568162;118568162;118572463;118572463;118572463;118574018;118574018;118574018;118578647;118578647;118578647;118580179;118580179;118580179;118584857;118584857;118584857…	+;+;+;+;+;+;+;+;+;+;+;+;+;+;+;+;+;+;+;+;+;+;+;+;+;+;+;+;+;+;+;+;+;+;+;+;+;+;+;+;+;+;+;+;+;+;+;+;+;+;+;+;+;+;+;+;+;+;+;+;+;+;+;+;+;+;+;+;+;+;+;+;+;+;+;+;+;+;+;+;+;+;+;+;+;+;+;+;+;+;+;+;+;+;+;+;+;+;+;+;+;+;+;+;+;+;+;+;+;+;+;+;+;+;+;+;+;+;+;+;+;+;+;+;+;+;+;+	6721	51	61	131	93	-1.03688	2.32254	16.8938	0.000582463	0.0331747
CNTRL	9;9;9;9;9;9;9;9;9;9;9;9;9;9;9;9;9;9;9;9;9;9;9;9;9;9;9;9;9;9;9;9;9;9;9;9;9;9;9;9;9;9;9;9;9;9;9;9;9;9;9;9;9;9;9;9;9;9;9;9;9;9;9;9;9;9;9;9;9;9;9;9;9;9;9;9;9;9;9;9;9;9;9;9;9;9;9;9;9;9;9;9;9;9;9;9;9;9;9;9;9;9;9;9;9;9;9;9;9;9;9;9;9;9;9;9;9;9;9;9;9;9;9;9;9;9;9;9;9;9;9;9;9;9;9;9;9;9;9;9;9;9;9;9;9;9;9;9;9;9;9;9;9;9;9;9;9;9;9;9;9;9;9;9;9;9;9;9;9;9;9;9;9;9;9;9;9;9;9;9;9;9;9;9;9;9;9;9;9;9;9;9;9;9;9;9;9;9;9;9…	121074863;121075012;121080306;121088296;121088296;121088296;121090275;121090275;121090275;121094888;121094888;121094888;121096422;121096422;121096422;121098386;121098386;121098386;121107802;121107802;121107802;121111063;121112459;121112459;121112459;121112459;121112459;121113502;121113502;121113502;121113502;121113502;121115091;121115091;121115091;121115091;121118346;121118346;121118346;121118346…	121075067;121075067;121080478;121088543;121088543;121088543;121090405;121090405;121090405;121095018;121095018;121095018;121096563;121096563;121096563;121098572;121098572;121098572;121107995;121107995;121107995;121111274;121112578;121112578;121112578;121112578;121112578;121113724;121113691;121113724;121113724;121113724;121115200;121115200;121115200;121115200;121118540;121118540;121118540;121118571…	+;+;+;+;+;+;+;+;+;+;+;+;+;+;+;+;+;+;+;+;+;+;+;+;+;+;+;+;+;+;+;+;+;+;+;+;+;+;+;+;+;+;+;+;+;+;+;+;+;+;+;+;+;+;+;+;+;+;+;+;+;+;+;+;+;+;+;+;+;+;+;+;+;+;+;+;+;+;+;+;+;+;+;+;+;+;+;+;+;+;+;+;+;+;+;+;+;+;+;+;+;+;+;+;+;+;+;+;+;+;+;+;+;+;+;+;+;+;+;+;+;+;+;+;+;+;+;+	9417	161	103	316	206	-1.03896	3.51969	22.1351	0.000149524	0.0142314
DTX2	7;7;7;7;7;7;7;7;7;7;7;7;7;7;7;7;7;7;7;7;7;7;7;7;7;7;7;7;7;7;7;7;7;7;7;7;7;7;7;7;7;7;7;7;7;7;7;7;7;7;7;7;7;7;7;7;7;7;7;7;7;7;7;7;7;7;7;7;7;7;7;7;7;7;7;7;7;7;7;7;7;7;7;7;7;7;7;7;7;7;7;7;7;7;7;7;7;7;7;7;7;7;7;7;7;7;7;7;7;7	76461676;76461697;76461697;76461701;76461709;76461709;76461709;76461716;76461717;76461720;76461727;76462458;76463445;76463545;76463545;76463545;76463545;76463545;76463545;76463545;76463654;76470300;76470300;76472062;76476943;76476943;76477114;76477114;76477114;76477114;76477114;76478127;76478975;76480421;76480421;76480421;76480421;76480421;76480421;76480421;76480421;76480421;76480421;76480421;764…	76461836;76461836;76461836;76461836;76461836;76461836;76461836;76461836;76461836;76461836;76461836;76462611;76463709;76463709;76463709;76463709;76463709;76463709;76463709;76463709;76463709;76470419;76470419;76472122;76477178;76477178;76477178;76477178;76477178;76477178;76477178;76478202;76479120;76480777;76480777;76480778;76480551;76480777;76480778;76480777;76480777;76480447;76480695;76480777;764…	+;+;+;+;+;+;+;+;+;+;+;+;+;+;+;+;+;+;+;+;+;+;+;+;+;+;+;+;+;+;+;+;+;+;+;+;+;+;+;+;+;+;+;+;+;+;+;+;+;+;+;+;+;+;+;+;+;+;+;+;+;+;+;+;+;+;+;+;+;+;+;+;+;+;+;+;+;+;+;+;+;+;+;+;+;+;+;+;+;+;+;+;+;+;+;+;+;+;+;+;+;+;+;+;+;+;+;+;+;+	5042	170.17	152.75	294.75	346.83	-1.04183	3.82353	30.3562	2.47e-05	0.00405874
CTD-2369P2.8	19	10285801	10289019	-	3219	159	164.5	311.5	338	-1.05048	3.83764	30.9569	2.19e-05	0.00373022
SMC3	10;10;10;10;10;10;10;10;10;10;10;10;10;10;10;10;10;10;10;10;10;10;10;10;10;10;10;10;10;10;10;10;10;10;10;10;10;10	110567691;110568327;110568938;110568938;110573707;110573707;110575336;110575336;110577421;110577421;110577835;110577835;110578628;110578628;110580904;110580904;110581923;110581923;110582562;110583384;110583841;110584183;110589605;110589892;110590412;110590991;110593073;110596398;110598139;110599654;110600439;110601022;110601637;110601966;110602474;110602825;110603184;110604231	110567831;110568487;110569013;110569013;110573745;110573745;110575403;110575403;110577492;110577492;110577914;110577914;110578706;110578706;110581021;110581021;110582006;110582098;110582642;110583548;110583962;110584396;110589708;110589991;110590572;110591132;110593223;110596550;110598290;110599812;110600546;110601130;110601884;110602178;110602665;110603002;110603290;110604636	+;+;+;+;+;+;+;+;+;+;+;+;+;+;+;+;+;+;+;+;+;+;+;+;+;+;+;+;+;+;+;+;+;+;+;+;+;+	4275	450	321	1000	552	-1.06008	5.07365	25.8495	6.35e-05	0.00766228
NFAT5	16;16;16;16;16;16;16;16;16;16;16;16;16;16;16;16;16;16;16;16;16;16;16;16;16;16;16;16;16;16;16;16;16;16;16;16;16;16;16;16;16;16;16;16;16;16;16;16;16;16;16;16;16;16;16;16;16;16;16;16;16;16;16;16;16;16;16;16;16;16;16;16;16;16;16;16;16;16;16;16;16;16;16;16;16;16;16;16;16;16;16;16;16;16;16;16;16;16;16;16;16;16;16;16;16;16;16;16;16;16;16;16;16;16;16;16;16;16;16;16;16;16;16;16;16;16;16;16;16;16;16;16;16	69565094;69565966;69565984;69566026;69566062;69566208;69566208;69566351;69568495;69568495;69568495;69568495;69568495;69626403;69626403;69626403;69626403;69626403;69626403;69626403;69626403;69644797;69646517;69646517;69646517;69646517;69646517;69647028;69647028;69647028;69647028;69647028;69647028;69647028;69647028;69647132;69653236;69653236;69653236;69653236;69653236;69653236;69653236;69653236;696…	69566374;69566374;69566374;69566374;69566374;69566374;69566374;69566374;69568548;69568548;69568548;69568548;69568548;69626528;69626528;69626528;69626528;69626528;69626528;69626528;69626528;69644856;69646578;69646578;69646578;69646578;69646578;69647586;69647586;69647586;69647586;69647167;69647586;69647586;69647586;69647167;69653428;69653428;69653428;69653428;69653428;69653428;69653428;69653428;696…	+;+;+;+;+;+;+;+;+;+;+;+;+;+;+;+;+;+;+;+;+;+;+;+;+;+;+;+;+;+;+;+;+;+;+;+;+;+;+;+;+;+;+;+;+;+;+;+;+;+;+;+;+;+;+;+;+;+;+;+;+;+;+;+;+;+;+;+;+;+;+;+;+;+;+;+;+;+;+;+;+;+;+;+;+;+;+;+;+;+;+;+;+;+;+;+;+;+;+;+;+;+;+;+;+;+;+;+;+;+;+;+;+;+;+;+;+;+;+;+;+;+;+;+;+;+;+;+	16401	331	180.5	572.5	447.5	-1.06155	4.47436	27.2879	4.65e-05	0.0061132
ANKRD36BP2	2;2;2;2;2;2;2;2;2;2;2;2;2;2;2;2;2;2;2;2;2;2;2;2;2;2;2;2;2;2;2;2;2;2;2;2;2;2;2;2;2;2;2;2;2;2;2;2;2;2;2;2;2;2;2;2;2;2;2	88765807;88765868;88765881;88765902;88765943;88772973;88772973;88772973;88772973;88773392;88776501;88776501;88776501;88776501;88778202;88782712;88782734;88782734;88782853;88782853;88782853;88784598;88784598;88784598;88784721;88784721;88784721;88786470;88786470;88786470;88786591;88786591;88786591;88788318;88788318;88788318;88788442;88788442;88788442;88792421;88792421;88792421;88797282;88800930;888…	88766196;88766196;88766196;88766196;88766196;88773044;88773044;88773044;88773044;88773568;88776575;88776573;88776573;88776573;88779565;88782762;88782762;88782762;88782925;88782925;88782925;88784626;88784626;88784626;88784793;88784926;88784926;88786498;88786498;88786498;88786663;88786663;88786663;88788346;88788346;88788346;88788514;88788514;88788514;88792494;88792494;88792494;88797423;88801305;888…	+;+;+;+;+;+;+;+;+;+;+;+;+;+;+;+;+;+;+;+;+;+;+;+;+;+;+;+;+;+;+;+;+;+;+;+;+;+;+;+;+;+;+;+;+;+;+;+;+;+;+;+;+;+;+;+;+;+;+	8042	35	29	70.5	59	-1.06406	1.54669	15.2258	0.000939648	0.047272
RBAK	7;7;7;7;7;7;7;7;7;7;7;7;7;7	5045821;5045922;5046255;5048033;5048033;5056987;5057295;5057295;5057684;5057684;5057684;5063695;5063695;5063695	5045958;5046396;5046396;5048091;5048091;5057421;5057421;5057421;5057779;5057779;5057779;5069488;5063875;5067257	+;+;+;+;+;+;+;+;+;+;+;+;+;+	6960	82.5	58.5	180.5	105	-1.06707	2.65071	17.8848	0.000443396	0.0281343
MPHOSPH9	12;12;12;12;12;12;12;12;12;12;12;12;12;12;12;12;12;12;12;12;12;12;12;12;12;12;12;12;12;12;12;12;12;12;12;12;12;12;12;12;12;12;12;12;12;12;12;12;12;12;12;12;12;12;12;12;12;12;12;12;12;12;12;12;12;12;12;12;12;12;12;12;12;12;12;12;12;12;12;12;12;12;12;12;12;12;12;12;12;12;12;12;12;12;12;12;12;12;12;12;12;12;12;12;12;12;12;12;12;12;12;12;12;12;12;12;12;12;12;12;12;12;12;12;12;12;12;12;12;12;12;12;12;…	123152320;123152324;123154215;123154215;123154382;123155688;123156399;123156636;123156636;123156774;123159694;123160781;123160781;123160781;123160781;123160781;123160781;123160781;123161136;123161136;123161136;123161136;123161136;123161136;123161136;123161136;123161268;123162115;123162115;123162115;123162115;123162115;123162115;123162115;123162773;123163014;123163014;123163014;123163014;123163014…	123152625;123152625;123156908;123156908;123154430;123155816;123156908;123156908;123156908;123156908;123160849;123160849;123160849;123160849;123160849;123160849;123160849;123160849;123161383;123161383;123161383;123161383;123161383;123161383;123161383;123161383;123161383;123162218;123162192;123162218;123163026;123162218;123162218;123162218;123163134;123163400;123163036;123163134;123163134;123163134…	-;-;-;-;-;-;-;-;-;-;-;-;-;-;-;-;-;-;-;-;-;-;-;-;-;-;-;-;-;-;-;-;-;-;-;-;-;-;-;-;-;-;-;-;-;-;-;-;-;-;-;-;-;-;-;-;-;-;-;-;-;-;-;-;-;-;-;-;-;-;-;-;-;-;-;-;-;-;-;-;-;-;-;-;-;-;-;-;-;-;-;-;-;-;-;-;-;-;-;-;-;-;-;-;-;-;-;-;-;-;-;-;-;-;-;-;-;-;-;-;-;-;-;-;-;-;-;-	10304	67.5	55.5	158.5	92	-1.07103	2.46513	17.4768	0.000495618	0.0296502
ERCC6L2	9;9;9;9;9;9;9;9;9;9;9;9;9;9;9;9;9;9;9;9;9;9;9;9;9;9;9;9;9;9;9;9;9;9;9;9;9;9;9;9;9;9;9;9;9;9;9;9;9;9;9;9;9;9;9;9;9;9;9;9;9;9;9;9;9;9;9;9;9	95875701;95876143;95880869;95880869;95897849;95897849;95906588;95907078;95907078;95915668;95915668;95915801;95916227;95916227;95916227;95921175;95921175;95921175;95922305;95922305;95922305;95922402;95923260;95923260;95923260;95923260;95923353;95928079;95928079;95928079;95928079;95928151;95928719;95928719;95928719;95928719;95928719;95941454;95941454;95941454;95941454;95941504;95954728;95954728;959…	95876084;95877105;95881293;95881293;95897971;95897971;95906710;95907271;95907271;95915829;95915829;95915829;95916434;95916434;95916434;95921315;95921315;95921315;95922418;95922418;95922418;95922418;95923379;95923379;95923379;95923379;95923379;95928150;95928150;95928150;95928150;95928277;95929117;95928864;95928864;95928864;95928864;95941549;95941549;95941549;95941549;95941549;95954922;95954922;959…	+;+;+;+;+;+;+;+;+;+;+;+;+;+;+;+;+;+;+;+;+;+;+;+;+;+;+;+;+;+;+;+;+;+;+;+;+;+;+;+;+;+;+;+;+;+;+;+;+;+;+;+;+;+;+;+;+;+;+;+;+;+;+;+;+;+;+;+;+	10352	74	42	148	87	-1.0733	2.3725	15.4528	0.000879127	0.0455854
C3	19;19;19;19;19;19;19;19;19;19;19;19;19;19;19;19;19;19;19;19;19;19;19;19;19;19;19;19;19;19;19;19;19;19;19;19;19;19;19;19;19;19;19;19;19;19;19;19;19;19;19;19;19;19;19;19;19;19;19;19;19;19;19;19;19;19;19;19;19;19;19;19;19;19;19;19;19;19;19;19;19;19;19;19;19;19;19;19;19;19;19;19;19;19;19;19;19;19;19;19;19;19;19;19;19;19;19;19	6677704;6677835;6677841;6677864;6677867;6677897;6678152;6678152;6678152;6678152;6678372;6678372;6678372;6678372;6679125;6679125;6679125;6679125;6679382;6679407;6679407;6680101;6680158;6680158;6680159;6681941;6681941;6681941;6682142;6682142;6682142;6684233;6684388;6684388;6684560;6684560;6684560;6684560;6684775;6684775;6684775;6684988;6684988;6684988;6686124;6686124;6686289;6686746;6686746;6690629…	6678023;6678023;6678023;6678287;6678023;6677958;6678287;6678330;6678287;6678287;6678455;6678455;6678455;6678455;6679201;6679208;6679208;6679208;6679496;6679496;6679496;6680151;6680263;6680263;6680263;6682030;6682030;6682030;6682229;6683360;6682229;6684439;6684478;6684439;6684632;6684650;6684650;6684650;6684834;6684834;6684834;6685038;6685146;6685146;6686376;6686287;6686902;6686902;6686902;6690727…	-;-;-;-;-;-;-;-;-;-;-;-;-;-;-;-;-;-;-;-;-;-;-;-;-;-;-;-;-;-;-;-;-;-;-;-;-;-;-;-;-;-;-;-;-;-;-;-;-;-;-;-;-;-;-;-;-;-;-;-;-;-;-;-;-;-;-;-;-;-;-;-;-;-;-;-;-;-;-;-;-;-;-;-;-;-;-;-;-;-;-;-;-;-;-;-;-;-;-;-;-;-;-;-;-;-;-;-	8328	168	237	420.5	424	-1.09175	4.2005	27.8584	4.12e-05	0.00567512
BPTF	17;17;17;17;17;17;17;17;17;17;17;17;17;17;17;17;17;17;17;17;17;17;17;17;17;17;17;17;17;17;17;17;17;17;17;17;17;17;17;17;17;17;17;17;17;17;17;17;17;17;17;17;17;17;17;17;17;17;17;17;17;17;17;17;17;17;17;17;17;17;17;17;17;17;17;17;17;17;17;17;17;17;17;17;17;17;17;17;17;17;17;17;17;17;17;17;17;17;17;17;17;17;17;17;17;17;17;17;17;17;17;17;17;17;17;17;17;17;17;17;17;17;17;17;17;17;17;17;17;17;17;17;17;…	67825524;67825664;67825665;67826112;67826142;67853940;67853940;67853940;67853940;67853940;67866464;67866464;67866464;67866464;67866464;67874817;67874817;67874817;67874817;67874817;67874920;67875556;67875556;67875556;67875556;67886128;67886128;67886128;67886128;67891452;67891844;67891844;67891844;67891844;67891844;67891844;67893221;67893370;67893370;67893370;67893370;67893370;67893370;67893680;678…	67826337;67826337;67826337;67826337;67826337;67854762;67854762;67854762;67854762;67854762;67866687;67866687;67866687;67866687;67866687;67875020;67875020;67875020;67875020;67875020;67875020;67875744;67875744;67875744;67875744;67886316;67886316;67886316;67886316;67892034;67891962;67892034;67892034;67892034;67892034;67892034;67893725;67893556;67893725;67893678;67893725;67893725;67893725;67893725;678…	+;+;+;+;+;+;+;+;+;+;+;+;+;+;+;+;+;+;+;+;+;+;+;+;+;+;+;+;+;+;+;+;+;+;+;+;+;+;+;+;+;+;+;+;+;+;+;+;+;+;+;+;+;+;+;+;+;+;+;+;+;+;+;+;+;+;+;+;+;+;+;+;+;+;+;+;+;+;+;+;+;+;+;+;+;+;+;+;+;+;+;+;+;+;+;+;+;+;+;+;+;+;+;+;+;+;+;+;+;+;+;+;+;+;+;+;+;+;+;+;+;+;+;+;+;+;+;+	15098	165.5	95.5	318	216	-1.09213	3.53525	23.6238	0.000105082	0.0110161
CTD-2537I9.12	19;19;19;19	55661901;55661912;55674649;55674649	55662382;55662394;55674715;55674710	-;-;-;-	561	45	37	82	88	-1.10238	1.91692	19.1187	0.000319139	0.0226323
ZGRF1	4;4;4;4;4;4;4;4;4;4;4;4;4;4;4;4;4;4;4;4;4;4;4;4;4;4;4;4;4;4;4;4;4;4;4;4;4;4;4;4;4;4;4;4;4;4;4;4;4;4;4;4;4;4;4;4;4;4;4;4;4;4;4;4;4;4;4;4;4;4;4;4;4;4;4;4;4;4;4;4;4;4;4;4;4;4;4;4;4;4;4;4;4;4;4;4;4;4;4;4;4;4;4;4;4;4;4;4;4;4;4;4;4;4;4;4;4;4;4;4;4;4;4;4;4;4;4;4;4;4;4;4;4;4;4;4;4;4;4;4;4;4;4;4;4;4;4;4;4;4;4;4;4;4;4	112539333;112539336;112539339;112539344;112539429;112539863;112539863;112539863;112539863;112539863;112540821;112540821;112540821;112540821;112540821;112541092;112541092;112541092;112541092;112541092;112547285;112547285;112547285;112547285;112547285;112548253;112548253;112548253;112553835;112553835;112553835;112553835;112553835;112554705;112554705;112554705;112554705;112554705;112558150;112558150…	112539689;112539689;112539689;112539689;112539689;112540124;112540124;112540124;112540124;112540124;112540955;112540955;112540955;112540955;112540955;112541268;112541268;112541268;112541268;112541268;112547408;112547408;112547408;112547408;112547408;112548380;112548380;112548380;112553982;112553982;112553982;112553982;112553982;112554782;112554782;112554782;112554782;112554782;112558309;112558309…	-;-;-;-;-;-;-;-;-;-;-;-;-;-;-;-;-;-;-;-;-;-;-;-;-;-;-;-;-;-;-;-;-;-;-;-;-;-;-;-;-;-;-;-;-;-;-;-;-;-;-;-;-;-;-;-;-;-;-;-;-;-;-;-;-;-;-;-;-;-;-;-;-;-;-;-;-;-;-;-;-;-;-;-;-;-;-;-;-;-;-;-;-;-;-;-;-;-;-;-;-;-;-;-;-;-;-;-;-;-;-;-;-;-;-;-;-;-;-;-;-;-;-;-;-;-;-;-	9103	47	32.33	90	75	-1.10844	1.86942	18.2792	0.000398647	0.0259443
NEMF	14;14;14;14;14;14;14;14;14;14;14;14;14;14;14;14;14;14;14;14;14;14;14;14;14;14;14;14;14;14;14;14;14;14;14;14;14;14;14;14;14;14;14;14;14;14;14;14;14;14;14;14;14;14;14;14;14;14;14;14;14;14;14;14;14;14;14;14;14;14;14;14;14;14;14;14;14;14;14;14;14;14;14;14;14;14;14;14;14;14;14;14;14;14;14;14;14;14;14;14;14;14;14;14;14;14;14;14;14;14;14;14;14;14;14;14;14;14;14;14;14;14;14;14;14;14;14;14;14;14;14;14;14;…	49782083;49783814;49783815;49783828;49784656;49784905;49784925;49784925;49784925;49784925;49784925;49784956;49785092;49785092;49785092;49785092;49785220;49785220;49785220;49785220;49786718;49786718;49786718;49786718;49786718;49786718;49789146;49789146;49789146;49789146;49789146;49789496;49789496;49789496;49789496;49789496;49789496;49795791;49795791;49795791;49795791;49795791;49795791;49796233;497…	49784713;49784713;49784713;49784713;49784713;49785320;49785004;49785320;49785320;49785004;49785004;49785004;49785135;49785135;49785135;49785135;49785774;49785320;49785320;49785320;49787174;49786750;49786750;49786750;49786750;49786750;49789343;49789343;49789343;49789343;49789343;49789573;49789573;49789573;49789573;49789573;49789573;49796314;49795944;49795944;49795944;49795944;49795944;49796328;497…	-;-;-;-;-;-;-;-;-;-;-;-;-;-;-;-;-;-;-;-;-;-;-;-;-;-;-;-;-;-;-;-;-;-;-;-;-;-;-;-;-;-;-;-;-;-;-;-;-;-;-;-;-;-;-;-;-;-;-;-;-;-;-;-;-;-;-;-;-;-;-;-;-;-;-;-;-;-;-;-;-;-;-;-;-;-;-;-;-;-;-;-;-;-;-;-;-;-;-;-;-;-;-;-;-;-;-;-;-;-;-;-;-;-;-;-;-;-;-;-;-;-;-;-;-;-;-;-	9426	315	221	708	410	-1.11231	4.58624	27.9868	4.01e-05	0.00562764
KIF18A	11;11;11;11;11;11;11;11;11;11;11;11;11;11;11;11;11;11;11;11;11;11;11;11;11;11;11;11;11;11;11	28020620;28023741;28035387;28036217;28058926;28062395;28069259;28076482;28077007;28077007;28082856;28082856;28083169;28083169;28084274;28084632;28084632;28088524;28088524;28088524;28090617;28090617;28091409;28091409;28094643;28094643;28097332;28097623;28097623;28108064;28108064	28021282;28023850;28035494;28036664;28059161;28062516;28069423;28076932;28077169;28077169;28082968;28082968;28083243;28083243;28084808;28084808;28084808;28088580;28088721;28088721;28090727;28090727;28091513;28091513;28094800;28094800;28097993;28097887;28097993;28108145;28108308	-;-;-;-;-;-;-;-;-;-;-;-;-;-;-;-;-;-;-;-;-;-;-;-;-;-;-;-;-;-;-	4668	157	91	329	189	-1.11947	3.48092	21.1496	0.000190273	0.0164832
CENPC	4;4;4;4;4;4;4;4;4;4;4;4;4;4;4;4;4;4;4;4;4;4;4;4;4;4;4;4;4;4;4;4;4;4;4;4;4;4;4;4;4;4;4;4;4;4;4;4;4;4;4;4;4;4;4;4;4;4;4;4;4;4;4;4;4;4;4;4;4;4;4;4;4;4;4;4;4;4;4	67468748;67472477;67472482;67474692;67474888;67474888;67474888;67489967;67489967;67489967;67489967;67492180;67492180;67492180;67492180;67492751;67492751;67492869;67492869;67493405;67493884;67493884;67493884;67493884;67495159;67495159;67495159;67495159;67495159;67505030;67505205;67505205;67505205;67505205;67506788;67506788;67506788;67506788;67506788;67508814;67508814;67508814;67508814;67508814;675…	67472675;67472675;67472675;67474978;67474978;67474978;67474978;67490121;67490121;67490121;67490121;67492275;67492275;67492275;67492275;67492997;67492997;67492997;67492997;67493988;67493988;67493988;67493988;67493988;67495201;67495212;67495212;67495212;67495212;67505284;67505284;67505284;67505284;67505284;67506934;67506934;67506934;67506934;67506934;67508919;67509105;67509105;67509105;67509105;675…	-;-;-;-;-;-;-;-;-;-;-;-;-;-;-;-;-;-;-;-;-;-;-;-;-;-;-;-;-;-;-;-;-;-;-;-;-;-;-;-;-;-;-;-;-;-;-;-;-;-;-;-;-;-;-;-;-;-;-;-;-;-;-;-;-;-;-;-;-;-;-;-;-;-;-;-;-;-;-	8613	101	50	184	133	-1.13179	2.77984	20.0227	0.000252617	0.0197547
PCM1	8;8;8;8;8;8;8;8;8;8;8;8;8;8;8;8;8;8;8;8;8;8;8;8;8;8;8;8;8;8;8;8;8;8;8;8;8;8;8;8;8;8;8;8;8;8;8;8;8;8;8;8;8;8;8;8;8;8;8;8;8;8;8;8;8;8;8;8;8;8;8;8;8;8;8;8;8;8;8;8;8;8;8;8;8;8;8;8;8;8;8;8;8;8;8;8;8;8;8;8;8;8;8;8;8;8;8;8;8;8;8;8;8;8;8;8;8;8;8;8;8;8;8;8;8;8;8;8;8;8;8;8;8;8;8;8;8;8;8;8;8;8;8;8;8;8;8;8;8;8;8;8;8;8;8;8;8;8;8;8;8;8;8;8;8;8;8;8;8;8;8;8;8;8;8;8;8;8;8;8;8;8;8;8;8;8;8;8;8;8;8;8;8;8;8;8;8;8;8;8…	17922840;17922857;17922968;17922990;17922990;17922999;17923006;17923010;17923028;17924713;17924713;17924713;17924713;17924713;17924713;17924713;17924744;17934706;17935589;17935589;17935589;17935589;17935589;17935589;17935589;17935589;17937134;17937134;17937134;17937134;17937134;17937134;17937134;17937134;17937176;17938740;17938740;17938740;17938740;17938740;17938740;17938740;17938839;17939691;179…	17923188;17923188;17923188;17923188;17923188;17923188;17923188;17923188;17923188;17924780;17924780;17924780;17927953;17924780;17924780;17924780;17924780;17934858;17935706;17935706;17935706;17935706;17935706;17935706;17935706;17935706;17937379;17937379;17937321;17937379;17937379;17937379;17937379;17937379;17937379;17939009;17939009;17939009;17939009;17939009;17939009;17939009;17939016;17939861;179…	+;+;+;+;+;+;+;+;+;+;+;+;+;+;+;+;+;+;+;+;+;+;+;+;+;+;+;+;+;+;+;+;+;+;+;+;+;+;+;+;+;+;+;+;+;+;+;+;+;+;+;+;+;+;+;+;+;+;+;+;+;+;+;+;+;+;+;+;+;+;+;+;+;+;+;+;+;+;+;+;+;+;+;+;+;+;+;+;+;+;+;+;+;+;+;+;+;+;+;+;+;+;+;+;+;+;+;+;+;+;+;+;+;+;+;+;+;+;+;+;+;+;+;+;+;+;+;+	14445	774.5	476	1603	1026	-1.13191	5.81117	35.8682	8.72e-06	0.00180271
ROCK1	18;18;18;18;18;18;18;18;18;18;18;18;18;18;18;18;18;18;18;18;18;18;18;18;18;18;18;18;18;18;18;18;18;18;18;18;18;18;18;18;18;18;18;18;18;18;18;18;18;18;18;18;18;18;18;18;18;18;18;18;18;18;18;18;18;18;18;18;18;18;18;18;18;18;18;18;18;18	20946906;20949952;20953290;20953578;20953578;20954783;20954783;20954783;20954854;20955167;20955167;20955167;20959840;20959840;20960136;20960136;20960663;20966917;20966917;20967752;20967752;20968485;20968772;20968772;20969115;20969115;20969115;20969958;20970348;20970348;20979910;20979910;20979910;20982763;20982763;20982763;20984351;20984351;20986950;20986950;20991176;20991176;20992831;20992831;210…	20951387;20951387;20953785;20953785;20953785;20954870;20955044;20955044;20955044;20955467;20955245;20955245;20959928;20959928;20960206;20960206;20960711;20967076;20967076;20967940;20967940;20968860;20968860;20968860;20969354;20969208;20969208;20970513;20970513;20970513;20980004;20980004;20980004;20982783;20982832;20982832;20984535;20984535;20987110;20987110;20991326;20991326;20992937;20992937;210…	-;-;-;-;-;-;-;-;-;-;-;-;-;-;-;-;-;-;-;-;-;-;-;-;-;-;-;-;-;-;-;-;-;-;-;-;-;-;-;-;-;-;-;-;-;-;-;-;-;-;-;-;-;-;-;-;-;-;-;-;-;-;-;-;-;-;-;-;-;-;-;-;-;-;-;-;-;-	11113	266	214	651	372	-1.13755	4.45105	29.3247	3.04e-05	0.00472866
VPS13B	8;8;8;8;8;8;8;8;8;8;8;8;8;8;8;8;8;8;8;8;8;8;8;8;8;8;8;8;8;8;8;8;8;8;8;8;8;8;8;8;8;8;8;8;8;8;8;8;8;8;8;8;8;8;8;8;8;8;8;8;8;8;8;8;8;8;8;8;8;8;8;8;8;8;8;8;8;8;8;8;8;8;8;8;8;8;8;8;8;8;8;8;8;8;8;8;8;8;8;8;8;8;8;8;8;8;8;8;8;8;8;8;8;8;8;8;8;8;8;8;8;8;8;8;8;8;8;8;8;8;8;8;8;8;8;8;8;8;8;8;8;8;8;8;8;8;8;8;8;8;8;8;8;8;8;8;8;8;8;8;8;8;8;8;8;8;8;8;8;8;8;8;8;8;8;8;8;8;8;8;8;8;8;8;8;8;8;8;8;8;8;8;8;8;8;8;8;8;8;8…	99013266;99013266;99013266;99013266;99013274;99013760;99013760;99013760;99013760;99013760;99038423;99038423;99038423;99038423;99038423;99096312;99096312;99096312;99096312;99096312;99102953;99102953;99102953;99102953;99102953;99103059;99111098;99111098;99111098;99111098;99111098;99115700;99115700;99115700;99115700;99115700;99121177;99121177;99121177;99121177;99121177;99121177;99134632;99134632;991…	99013347;99013347;99013347;99013347;99013347;99013935;99013935;99013935;99013935;99013935;99038566;99038566;99038566;99038566;99038566;99096432;99096432;99096432;99096432;99096432;99103120;99103120;99103120;99103120;99103120;99103120;99111279;99111279;99111279;99111279;99111279;99115874;99115874;99115874;99115874;99115874;99121762;99121332;99121445;99121445;99121445;99121445;99134727;99134727;991…	+;+;+;+;+;+;+;+;+;+;+;+;+;+;+;+;+;+;+;+;+;+;+;+;+;+;+;+;+;+;+;+;+;+;+;+;+;+;+;+;+;+;+;+;+;+;+;+;+;+;+;+;+;+;+;+;+;+;+;+;+;+;+;+;+;+;+;+;+;+;+;+;+;+;+;+;+;+;+;+;+;+;+;+;+;+;+;+;+;+;+;+;+;+;+;+;+;+;+;+;+;+;+;+;+;+;+;+;+;+;+;+;+;+;+;+;+;+;+;+;+;+;+;+;+;+;+;+	16716	113	78	226.5	179.5	-1.14224	3.13131	29.0187	3.24e-05	0.00487677
CEP152	15;15;15;15;15;15;15;15;15;15;15;15;15;15;15;15;15;15;15;15;15;15;15;15;15;15;15;15;15;15;15;15;15;15;15;15;15;15;15;15;15;15;15;15;15;15;15;15;15;15;15;15;15;15;15;15;15;15;15;15;15;15;15;15;15;15;15;15;15;15;15;15;15;15;15;15;15;15;15;15;15;15;15;15;15;15;15;15;15;15;15;15;15;15;15;15;15;15;15;15;15;15;15;15;15;15;15;15;15;15	48712928;48717018;48737935;48738151;48740506;48741601;48741601;48741631;48741947;48741947;48741947;48741947;48744240;48744240;48744240;48744896;48744896;48744896;48748443;48748443;48752349;48752349;48752349;48755903;48755903;48755903;48760135;48760135;48760135;48762391;48762391;48762391;48767060;48767060;48767060;48767335;48767335;48767335;48768219;48768219;48768219;48768956;48768956;48768956;487…	48713210;48717169;48739288;48739288;48741704;48741704;48741704;48741704;48742100;48742100;48742014;48742100;48744343;48744343;48744343;48744992;48744992;48744992;48748610;48748610;48752469;48752469;48752469;48756553;48756553;48756553;48760266;48760266;48760266;48762672;48762672;48762672;48767192;48767192;48767192;48767463;48767463;48767463;48768328;48768328;48768328;48769081;48769081;48769081;487…	-;-;-;-;-;-;-;-;-;-;-;-;-;-;-;-;-;-;-;-;-;-;-;-;-;-;-;-;-;-;-;-;-;-;-;-;-;-;-;-;-;-;-;-;-;-;-;-;-;-;-;-;-;-;-;-;-;-;-;-;-;-;-;-;-;-;-;-;-;-;-;-;-;-;-;-;-;-;-;-;-;-;-;-;-;-;-;-;-;-;-;-;-;-;-;-;-;-;-;-;-;-;-;-;-;-;-;-;-;-	8168	82	43	162.5	104	-1.15006	2.52699	18.7614	0.000350601	0.0242807
MIR3911	9;9	127690098;127690687	127690840;127690795	-;-	743	45	35	92	81	-1.16233	1.92051	21.202	0.000187819	0.0163686
POM121B	7;7;7;7;7;7;7;7	73293497;73294240;73294754;73295322;73295724;73296745;73300515;73301066	73293589;73294314;73294876;73295423;73295900;73298439;73300640;73301161	+;+;+;+;+;+;+;+	2487	217.04	156.08	341	461.5	-1.16679	4.10603	34.0989	1.2e-05	0.00235244
ROCK2	2;2;2;2;2;2;2;2;2;2;2;2;2;2;2;2;2;2;2;2;2;2;2;2;2;2;2;2;2;2;2;2;2;2;2;2;2;2;2;2;2;2;2;2;2;2;2;2;2;2;2;2;2;2;2;2;2;2;2;2;2;2;2;2;2;2;2;2;2;2;2;2;2;2;2;2;2;2;2;2;2;2;2;2;2;2;2;2;2;2;2;2;2;2;2;2;2;2;2;2;2;2;2;2;2;2;2;2;2;2;2;2;2;2;2;2;2;2;2;2;2;2;2;2;2;2;2;2;2;2	11179761;11181652;11183331;11192148;11192148;11192148;11192451;11192451;11192451;11192676;11193779;11193779;11193779;11193779;11193910;11194256;11194256;11194256;11194256;11194955;11194955;11194955;11194955;11194955;11197180;11197180;11197180;11197526;11197526;11197526;11198491;11198491;11198491;11198681;11198681;11198681;11200957;11200957;11200957;11201310;11201310;11201310;11202052;11202052;112…	11183440;11183440;11183440;11192361;11192361;11192361;11192712;11192712;11192712;11192712;11193857;11193857;11193857;11193857;11194344;11194344;11194344;11194344;11194344;11195210;11195116;11195025;11195025;11195025;11197348;11197348;11197348;11197705;11197705;11197705;11198585;11198585;11198585;11198774;11198774;11198774;11201143;11201143;11201143;11201413;11201413;11201413;11202121;11202121;112…	-;-;-;-;-;-;-;-;-;-;-;-;-;-;-;-;-;-;-;-;-;-;-;-;-;-;-;-;-;-;-;-;-;-;-;-;-;-;-;-;-;-;-;-;-;-;-;-;-;-;-;-;-;-;-;-;-;-;-;-;-;-;-;-;-;-;-;-;-;-;-;-;-;-;-;-;-;-;-;-;-;-;-;-;-;-;-;-;-;-;-;-;-;-;-;-;-;-;-;-;-;-;-;-;-;-;-;-;-;-;-;-;-;-;-;-;-;-;-;-;-;-;-;-;-;-;-;-	10145	210.5	140.5	492	274	-1.17829	4.02263	26.7051	5.27e-05	0.00651355
MT-RNR1	MT	648	1601	+	954	17312.2	12632	37860.1	27546.7	-1.18215	10.4322	74.7863	4.68e-08	3.56e-05
ARID4A	14;14;14;14;14;14;14;14;14;14;14;14;14;14;14;14;14;14;14;14;14;14;14;14;14;14;14;14;14;14;14;14;14;14;14;14;14;14;14;14;14;14;14;14;14;14;14;14;14;14;14;14;14;14;14;14;14;14;14;14;14;14;14;14;14;14;14;14;14;14;14;14;14;14;14;14;14;14;14;14;14;14;14;14;14;14;14;14;14;14;14;14;14;14;14;14;14;14;14;14;14;14;14;14;14;14;14;14;14;14;14;14;14;14;14;14;14;14;14;14;14;14;14;14;14;14;14;14;14;14;14;14	58298385;58298504;58298556;58298559;58298588;58299331;58299537;58299798;58299798;58299798;58299798;58299798;58299798;58301580;58301580;58301580;58301580;58301580;58301580;58303538;58304944;58304944;58304944;58304944;58304944;58304944;58304944;58306022;58306022;58306022;58306022;58306022;58306022;58318542;58318542;58318542;58318542;58318542;58318711;58318711;58318711;58318711;58318711;58323485;583…	58298700;58298700;58298700;58298700;58298700;58299691;58299860;58299860;58299860;58299860;58299860;58299860;58299860;58301690;58301690;58301690;58301690;58301690;58301690;58303761;58305009;58304990;58305009;58305009;58305009;58305009;58305009;58306112;58306112;58306112;58306112;58306112;58306112;58318621;58318621;58318621;58318621;58318621;58318805;58318805;58318805;58318805;58318805;58323617;583…	+;+;+;+;+;+;+;+;+;+;+;+;+;+;+;+;+;+;+;+;+;+;+;+;+;+;+;+;+;+;+;+;+;+;+;+;+;+;+;+;+;+;+;+;+;+;+;+;+;+;+;+;+;+;+;+;+;+;+;+;+;+;+;+;+;+;+;+;+;+;+;+;+;+;+;+;+;+;+;+;+;+;+;+;+;+;+;+;+;+;+;+;+;+;+;+;+;+;+;+;+;+;+;+;+;+;+;+;+;+;+;+;+;+;+;+;+;+;+;+;+;+;+;+;+;+;+;+	7568	101	63	238	123	-1.19011	2.94352	20.0453	0.000251165	0.0197479
PYGO2	1;1;1;1;1;1;1;1;1	154957026;154958740;154959638;154960977;154960977;154960977;154961474;154961888;154963519	154959846;154959846;154959846;154961026;154961026;154961026;154961748;154962036;154963853	-;-;-;-;-;-;-;-;-	3630	909.5	731.5	1704	1928	-1.20266	6.26431	69.9012	7.87e-08	5.39e-05
TNFAIP2	14;14;14;14;14;14;14;14;14;14;14;14;14;14;14;14;14;14;14;14;14;14;14;14;14;14;14;14;14;14;14;14;14;14;14;14;14;14;14;14;14;14;14;14;14;14;14;14;14;14;14;14;14;14;14;14;14;14;14;14;14;14;14;14;14;14;14;14;14;14;14;14;14;14;14	103123442;103123461;103123461;103124375;103126310;103126310;103126310;103126327;103126389;103126389;103127005;103127005;103127403;103127566;103127576;103129740;103129740;103129740;103129740;103129740;103130002;103130002;103130002;103130002;103130002;103130002;103130315;103130315;103130315;103130315;103130315;103130315;103131052;103131052;103131052;103131052;103131052;103131052;103131096;103131639…	103123483;103123951;103123483;103124506;103126575;103126692;103126692;103126692;103126564;103126692;103127629;103127629;103127629;103127629;103127629;103130124;103129854;103129854;103129854;103129854;103130124;103130124;103130124;103130124;103130124;103130033;103130415;103130415;103130415;103130415;103130415;103130415;103131150;103131150;103131150;103131150;103131150;103131150;103131150;103131762…	+;+;+;+;+;+;+;+;+;+;+;+;+;+;+;+;+;+;+;+;+;+;+;+;+;+;+;+;+;+;+;+;+;+;+;+;+;+;+;+;+;+;+;+;+;+;+;+;+;+;+;+;+;+;+;+;+;+;+;+;+;+;+;+;+;+;+;+;+;+;+;+;+;+;+	5029	129	174	315	366	-1.20452	3.8593	31.9658	1.8e-05	0.00326609
ZNF638	2;2;2;2;2;2;2;2;2;2;2;2;2;2;2;2;2;2;2;2;2;2;2;2;2;2;2;2;2;2;2;2;2;2;2;2;2;2;2;2;2;2;2;2;2;2;2;2;2;2;2;2;2;2;2;2;2;2;2;2;2;2;2;2;2;2;2;2;2;2;2;2;2;2;2;2;2;2;2;2;2;2;2;2;2;2;2;2;2;2;2;2;2;2;2;2;2;2;2;2;2;2;2;2;2;2;2;2;2;2;2;2;2;2;2;2;2;2;2;2;2;2;2;2;2;2;2;2;2;2;2;2;2;2;2;2;2;2;2;2;2;2;2;2;2;2;2;2;2;2;2;2;2;2;2;2;2;2;2;2;2;2;2;2;2;2;2;2;2;2;2;2;2;2;2;2;2;2;2;2;2;2;2;2;2	71276561;71276593;71276593;71276645;71331728;71331760;71331762;71331764;71331764;71331766;71331766;71331782;71331782;71331782;71332830;71334501;71334501;71334501;71341710;71348427;71348427;71348427;71348753;71348753;71348753;71348753;71348753;71348753;71355719;71355719;71355719;71355719;71355719;71355719;71355719;71361645;71363153;71363153;71363153;71363153;71363153;71363153;71363153;71363153;713…	71276754;71276754;71276754;71276754;71331865;71331875;71331865;71331865;71331875;71331865;71331875;71331875;71331875;71331865;71333077;71334596;71334596;71334596;71341837;71348838;71349063;71350271;71349042;71349141;71349141;71350271;71349545;71350271;71355780;71355780;71355780;71355780;71355780;71355780;71355780;71361695;71363191;71363191;71363191;71363191;71363191;71363191;71363191;71363191;713…	+;+;+;+;+;+;+;+;+;+;+;+;+;+;+;+;+;+;+;+;+;+;+;+;+;+;+;+;+;+;+;+;+;+;+;+;+;+;+;+;+;+;+;+;+;+;+;+;+;+;+;+;+;+;+;+;+;+;+;+;+;+;+;+;+;+;+;+;+;+;+;+;+;+;+;+;+;+;+;+;+;+;+;+;+;+;+;+;+;+;+;+;+;+;+;+;+;+;+;+;+;+;+;+;+;+;+;+;+;+;+;+;+;+;+;+;+;+;+;+;+;+;+;+;+;+;+;+	12474	201.5	154.5	547.25	255	-1.21712	4.07525	23.938	9.77e-05	0.0104706
KTN1	14;14;14;14;14;14;14;14;14;14;14;14;14;14;14;14;14;14;14;14;14;14;14;14;14;14;14;14;14;14;14;14;14;14;14;14;14;14;14;14;14;14;14;14;14;14;14;14;14;14;14;14;14;14;14;14;14;14;14;14;14;14;14;14;14;14;14;14;14;14;14;14;14;14;14;14;14;14;14;14;14;14;14;14;14;14;14;14;14;14;14;14;14;14;14;14;14;14;14;14;14;14;14;14;14;14;14;14;14;14;14;14;14;14;14;14;14;14;14;14;14;14;14;14;14;14;14;14;14;14;14;14;14;…	55559072;55580210;55580254;55580315;55580317;55580322;55580324;55601757;55601757;55601757;55601792;55607346;55611977;55611977;55612019;55612019;55612019;55612019;55612019;55612019;55612019;55616517;55616517;55616517;55616517;55616517;55616517;55616517;55617964;55617964;55617964;55617964;55617964;55617964;55617964;55619182;55619182;55619182;55619182;55619182;55619182;55619182;55627912;55627912;556…	55559150;55580354;55580354;55580354;55580354;55580354;55580354;55601880;55601880;55601880;55601880;55607460;55612571;55612571;55612571;55612571;55612571;55612571;55612273;55612571;55612230;55616654;55616654;55616654;55616654;55616654;55616654;55616654;55618134;55618134;55618134;55618134;55618134;55618134;55618134;55619312;55619312;55619312;55619312;55619312;55619312;55619312;55628028;55628028;556…	+;+;+;+;+;+;+;+;+;+;+;+;+;+;+;+;+;+;+;+;+;+;+;+;+;+;+;+;+;+;+;+;+;+;+;+;+;+;+;+;+;+;+;+;+;+;+;+;+;+;+;+;+;+;+;+;+;+;+;+;+;+;+;+;+;+;+;+;+;+;+;+;+;+;+;+;+;+;+;+;+;+;+;+;+;+;+;+;+;+;+;+;+;+;+;+;+;+;+;+;+;+;+;+;+;+;+;+;+;+;+;+;+;+;+;+;+;+;+;+;+;+;+;+;+;+;+;+	17575	1393	908.83	3336	1830	-1.22177	6.75467	38.717	5.31e-06	0.00121952
FER1L4	20;20;20;20;20;20;20;20;20;20;20;20;20;20;20;20;20;20;20;20;20;20;20;20;20;20;20;20;20;20;20;20;20;20;20;20;20;20;20;20;20;20;20;20;20;20;20;20;20;20;20;20;20;20;20;20;20;20;20;20;20;20;20;20;20;20;20;20;20;20;20;20;20;20;20;20;20;20;20;20;20;20;20;20;20;20;20;20;20;20;20;20;20;20;20;20;20;20;20;20;20;20;20;20;20;20;20;20;20;20;20;20;20;20;20;20;20;20;20;20;20;20;20;20;20;20;20;20;20;20;20;20;20;…	35558737;35558737;35558737;35558742;35558744;35558866;35559156;35559156;35559156;35559156;35559156;35559156;35559341;35559341;35559341;35559341;35559341;35560123;35560123;35560123;35560123;35560163;35560540;35560540;35560540;35560540;35561852;35561852;35561852;35561852;35561852;35561852;35562809;35562809;35563854;35563854;35563854;35563854;35563854;35563854;35564748;35564748;35565100;35565100;355…	35559052;35559052;35559052;35559052;35559052;35559052;35559256;35559627;35559256;35559256;35559256;35559256;35559627;35559627;35560638;35559627;35559627;35560364;35560364;35560638;35560364;35560364;35560638;35560638;35560638;35560638;35561937;35561937;35561937;35561937;35561937;35561937;35562969;35562969;35564008;35564008;35564918;35564918;35564918;35564540;35564918;35564918;35565227;35565227;355…	-;-;-;-;-;-;-;-;-;-;-;-;-;-;-;-;-;-;-;-;-;-;-;-;-;-;-;-;-;-;-;-;-;-;-;-;-;-;-;-;-;-;-;-;-;-;-;-;-;-;-;-;-;-;-;-;-;-;-;-;-;-;-;-;-;-;-;-;-;-;-;-;-;-;-;-;-;-;-;-;-;-;-;-;-;-;-;-;-;-;-;-;-;-;-;-;-;-;-;-;-;-;-;-;-;-;-;-;-;-;-;-;-;-;-;-;-;-;-;-;-;-;-;-;-;-;-;-	9067	35.5	46.5	112	75.5	-1.22794	2.01352	19.6943	0.000274819	0.0207073
REV3L	6;6;6;6;6;6;6;6;6;6;6;6;6;6;6;6;6;6;6;6;6;6;6;6;6;6;6;6;6;6;6;6;6;6;6;6;6;6;6;6;6;6;6;6;6;6;6;6;6;6;6;6;6;6;6;6;6;6;6;6;6;6;6;6;6;6;6;6;6;6;6;6;6;6;6;6;6;6;6;6;6;6;6;6;6;6;6;6;6;6;6;6;6;6;6;6;6;6;6;6;6;6;6;6;6;6;6;6;6;6;6;6;6;6;6;6;6;6;6;6;6;6;6;6;6;6;6;6;6;6;6;6;6;6;6;6;6;6;6;6;6;6;6;6;6;6;6;6;6;6;6;6;6;6;6;6;6;6;6;6;6;6;6;6;6;6;6;6;6;6;6;6;6;6;6;6;6;6;6;6;6;6;6;6;6;6;6;6;6;6;6;6;6;6;6;6;6;6;6;6…	111299028;111299031;111299031;111299031;111299031;111299052;111299052;111307361;111307361;111307361;111307361;111307361;111307361;111307361;111307731;111308014;111308014;111309853;111309853;111309853;111309853;111309853;111309853;111309853;111309853;111311069;111311069;111311069;111311069;111311069;111311069;111311069;111311069;111313352;111313352;111313352;111313352;111313352;111313352;111313352…	111300156;111300156;111300156;111300156;111300156;111300156;111300156;111307570;111307570;111307570;111307570;111307570;111307570;111307570;111307735;111308245;111308245;111310099;111310099;111310099;111310099;111310099;111310099;111310099;111310099;111311259;111311259;111311259;111311259;111311259;111311259;111311259;111311259;111313489;111313489;111313489;111313489;111313489;111313489;111313489…	-;-;-;-;-;-;-;-;-;-;-;-;-;-;-;-;-;-;-;-;-;-;-;-;-;-;-;-;-;-;-;-;-;-;-;-;-;-;-;-;-;-;-;-;-;-;-;-;-;-;-;-;-;-;-;-;-;-;-;-;-;-;-;-;-;-;-;-;-;-;-;-;-;-;-;-;-;-;-;-;-;-;-;-;-;-;-;-;-;-;-;-;-;-;-;-;-;-;-;-;-;-;-;-;-;-;-;-;-;-;-;-;-;-;-;-;-;-;-;-;-;-;-;-;-;-;-;-	12425	80	50	194	100	-1.22819	2.64078	19.9036	0.000260429	0.0198298
WASH6P	X;X;X;X;X;X;X;X;X;X;X;X;X;X;X;X;X;X;X;X;X;X;X;X;X;X;X;X;X;X;X;X;X;X;X;X;X;X;X;X;X;X;X;X;X;X;X;X;X;X;X;X;X;X;X;X;X;X;X;X;X;X;X;X;X;X;X;X;X;X;X	156020826;156020961;156021328;156021445;156021506;156021677;156021681;156021688;156021688;156021688;156021694;156021999;156021999;156021999;156021999;156021999;156021999;156021999;156021999;156021999;156021999;156022314;156022314;156022323;156022323;156022323;156022323;156022323;156022323;156022323;156022699;156022699;156022699;156022699;156022786;156023012;156023012;156023012;156023012;156023012…	156021148;156021148;156023209;156021792;156021563;156021792;156021792;156021792;156021792;156021792;156021792;156022459;156022145;156022145;156022145;156022145;156022145;156022145;156022145;156022145;156022145;156022834;156022459;156022539;156022459;156022834;156022834;156022459;156022459;156022415;156022834;156022834;156022834;156022834;156023213;156023209;156023092;156023209;156023213;156023209…	+;+;+;+;+;+;+;+;+;+;+;+;+;+;+;+;+;+;+;+;+;+;+;+;+;+;+;+;+;+;+;+;+;+;+;+;+;+;+;+;+;+;+;+;+;+;+;+;+;+;+;+;+;+;+;+;+;+;+;+;+;+;+;+;+;+;+;+;+;+;+	4618	54.91	52.08	100.48	143.83	-1.24194	2.38949	24.2484	9.1e-05	0.00997109
SLC12A5	20;20;20;20;20;20;20;20;20;20;20;20;20;20;20;20;20;20;20;20;20;20;20;20;20;20;20;20;20;20;20;20;20;20;20;20;20;20;20;20;20;20;20;20;20;20;20;20;20;20;20;20;20;20;20;20;20;20;20;20;20;20;20;20;20;20;20;20;20;20;20;20;20;20;20;20;20;20;20;20;20;20;20;20;20;20;20;20;20;20;20;20;20;20;20;20;20;20;20;20;20;20;20;20;20;20;20;20;20;20;20;20;20;20;20;20;20;20;20;20;20;20;20;20;20;20;20;20;20;20;20;20;20;…	46021690;46021699;46021712;46021776;46021839;46022709;46022843;46022930;46023369;46023369;46023369;46023369;46027663;46029009;46029182;46029182;46029182;46029182;46029182;46029182;46029182;46029182;46029184;46029196;46029224;46029332;46034923;46034948;46034948;46034948;46034948;46034948;46034948;46034948;46034948;46034948;46034948;46034948;46034948;46034948;46035374;46035404;46035404;46035404;460…	46021886;46021886;46021886;46021886;46021886;46023071;46023071;46023071;46023589;46023396;46023581;46023581;46027799;46029129;46029396;46029396;46029396;46029396;46029396;46029396;46029396;46029396;46029396;46029396;46029396;46029396;46034957;46035042;46035042;46035042;46035042;46035042;46035042;46035042;46035042;46035042;46035535;46035042;46035042;46035042;46035535;46035535;46035535;46035535;460…	+;+;+;+;+;+;+;+;+;+;+;+;+;+;+;+;+;+;+;+;+;+;+;+;+;+;+;+;+;+;+;+;+;+;+;+;+;+;+;+;+;+;+;+;+;+;+;+;+;+;+;+;+;+;+;+;+;+;+;+;+;+;+;+;+;+;+;+;+;+;+;+;+;+;+;+;+;+;+;+;+;+;+;+;+;+;+;+;+;+;+;+;+;+;+;+;+;+;+;+;+;+;+;+;+;+;+;+;+;+;+;+;+;+;+;+;+;+;+;+;+;+;+;+;+;+;+;+	8909	32	31	76	69	-1.24703	1.65047	21.6662	0.00016756	0.0151506
MT1L	16;16;16;16;16	56617476;56617563;56618179;56618179;56618589	56617590;56617590;56618244;56618228;56618818	+;+;+;+;+	411	23	26	51	62	-1.24907	1.30814	17.178	0.000538182	0.031559
PIBF1	13;13;13;13;13;13;13;13;13;13;13;13;13;13;13;13;13;13;13;13;13;13;13;13;13;13;13;13;13;13;13;13;13;13;13;13;13;13;13;13;13;13;13;13;13;13;13;13;13;13;13;13;13;13;13;13;13;13;13;13;13;13	72782059;72782140;72782154;72782225;72783423;72783423;72792447;72792447;72792447;72795359;72795359;72795359;72797907;72797907;72797907;72797909;72821849;72821849;72821849;72827010;72827010;72827010;72827733;72827733;72835243;72835243;72835243;72835243;72854057;72854057;72884444;72893784;72893784;72893784;72908531;72908531;72908531;72917076;72917076;72917076;72931165;72931165;72931165;72965274;729…	72782349;72782349;72782349;72782349;72783721;72783721;72792547;72792547;72792547;72795557;72795557;72795557;72798026;72798026;72798026;72798026;72821982;72821982;72821982;72827118;72827118;72827118;72827914;72827914;72835276;72835368;72835368;72835368;72854155;72854155;72884671;72893871;72893949;72893949;72908681;72908681;72908681;72917166;72917166;72917166;72931267;72931267;72931267;72965404;729…	+;+;+;+;+;+;+;+;+;+;+;+;+;+;+;+;+;+;+;+;+;+;+;+;+;+;+;+;+;+;+;+;+;+;+;+;+;+;+;+;+;+;+;+;+;+;+;+;+;+;+;+;+;+;+;+;+;+;+;+;+;+	4253	51	28	110	71	-1.24996	1.95266	19.2886	0.000305285	0.0220828
IGF2	11;11;11;11;11;11;11;11;11;11;11;11;11;11;11;11;11;11;11;11;11;11;11;11;11;11;11;11;11	2129112;2129112;2129112;2132500;2132640;2132673;2132716;2133517;2133517;2133517;2133517;2133517;2133517;2133517;2135367;2135367;2135367;2135367;2135367;2135367;2135367;2137188;2137188;2137192;2138229;2138229;2140135;2140857;2140857	2133223;2133223;2133223;2133223;2133223;2133223;2133223;2133665;2133665;2133665;2133674;2133674;2133665;2133665;2135529;2135529;2135529;2135529;2135529;2135529;2135529;2137287;2137290;2137305;2139389;2138974;2140299;2141016;2141238	-;-;-;-;-;-;-;-;-;-;-;-;-;-;-;-;-;-;-;-;-;-;-;-;-;-;-;-;-	6259	191.83	251.83	525.5	506	-1.25071	4.4378	41.2201	3.5e-06	0.000975026
ESCO1	18;18;18;18;18;18;18;18;18;18;18;18;18;18;18;18;18;18;18;18;18;18;18;18;18;18;18;18;18;18;18;18;18;18	21529281;21529303;21529310;21532473;21532473;21532473;21536042;21536042;21536042;21539920;21539920;21539920;21540577;21540577;21560859;21560859;21560859;21564203;21564203;21566146;21566146;21567980;21567980;21573314;21573314;21575672;21575672;21584310;21584310;21593043;21596953;21600623;21600623;21600623	21530490;21530490;21530490;21532660;21532660;21532660;21536185;21536185;21536185;21540009;21540009;21540009;21540700;21540700;21560981;21560990;21560990;21564317;21564317;21566206;21566206;21568094;21568094;21575430;21575430;21575777;21575777;21584440;21584440;21593488;21596999;21600884;21600704;21600736	-;-;-;-;-;-;-;-;-;-;-;-;-;-;-;-;-;-;-;-;-;-;-;-;-;-;-;-;-;-;-;-;-;-	5288	53	33	119	79	-1.25499	2.07809	21.7307	0.000164944	0.0151028
SGO2	2;2;2;2;2;2;2;2;2;2;2;2;2;2;2;2;2;2;2;2;2;2;2;2;2;2;2;2	200510008;200526136;200526157;200526167;200531775;200532974;200532974;200532974;200532974;200534996;200534996;200534996;200535046;200535141;200536065;200536065;200536065;200536065;200542579;200542579;200542579;200542579;200543025;200569663;200569663;200571050;200575311;200583449	200510266;200526252;200526252;200526252;200531901;200533108;200533375;200533108;200533108;200535171;200535124;200535171;200535171;200535171;200536142;200536142;200536142;200536142;200542950;200542664;200542664;200542664;200543622;200570142;200569892;200573977;200575461;200583782	+;+;+;+;+;+;+;+;+;+;+;+;+;+;+;+;+;+;+;+;+;+;+;+;+;+;+;+	6022	106	63	265	125	-1.2586	3.03178	20.2064	0.00024107	0.0191625
NKTR	3;3;3;3;3;3;3;3;3;3;3;3;3;3;3;3;3;3;3;3;3;3;3;3;3;3;3;3;3;3;3;3;3;3;3;3;3;3;3;3;3;3;3;3;3;3;3;3;3;3;3;3;3;3;3;3;3;3;3;3;3;3;3;3;3;3;3;3;3;3;3;3;3;3;3;3;3;3;3;3;3;3;3;3;3;3;3;3;3;3;3;3;3;3;3;3;3;3;3;3;3;3;3;3;3;3;3;3;3;3;3;3;3;3;3;3;3;3;3;3;3;3;3;3;3;3;3;3	42600614;42600655;42600660;42600672;42600682;42600686;42600718;42600743;42600761;42600980;42600984;42600984;42600984;42600984;42600984;42600984;42600984;42600984;42611103;42617570;42617570;42617570;42617570;42617570;42617570;42617570;42617570;42619020;42619020;42619020;42619020;42619020;42619020;42619020;42619020;42619664;42619664;42619664;42619664;42619664;42619664;42619664;42619819;42620016;426…	42600778;42600778;42600778;42600778;42600778;42600778;42600778;42600778;42601064;42601064;42603056;42601064;42601064;42601064;42601064;42601064;42601064;42601064;42611184;42617644;42617644;42617644;42617644;42617644;42617644;42617644;42617644;42619127;42619127;42619127;42619127;42619127;42619127;42619708;42619127;42619708;42619708;42619708;42619723;42621516;42619708;42619708;42621516;42620043;426…	+;+;+;+;+;+;+;+;+;+;+;+;+;+;+;+;+;+;+;+;+;+;+;+;+;+;+;+;+;+;+;+;+;+;+;+;+;+;+;+;+;+;+;+;+;+;+;+;+;+;+;+;+;+;+;+;+;+;+;+;+;+;+;+;+;+;+;+;+;+;+;+;+;+;+;+;+;+;+;+;+;+;+;+;+;+;+;+;+;+;+;+;+;+;+;+;+;+;+;+;+;+;+;+;+;+;+;+;+;+;+;+;+;+;+;+;+;+;+;+;+;+;+;+;+;+;+;+	17356	315	209	721	490.5	-1.26517	4.65731	42.481	2.86e-06	0.000856336
FER	5;5;5;5;5;5;5;5;5;5;5;5;5;5;5;5;5;5;5;5;5;5;5;5;5;5;5;5;5;5;5;5;5;5;5;5;5;5;5;5;5;5;5;5;5;5;5;5;5;5;5;5;5;5;5;5;5;5;5;5;5;5;5;5;5;5;5;5;5;5;5;5;5;5;5;5;5;5;5;5;5;5;5;5;5;5;5;5	108747822;108747841;108748399;108748962;108748967;108768093;108768093;108768093;108782663;108798114;108798124;108798124;108798124;108798124;108798124;108832770;108832770;108832770;108832770;108832770;108835708;108835708;108835708;108835913;108841831;108842262;108867767;108867767;108871365;108871365;108872093;108872093;108883396;108883396;108897648;108897659;108897659;108924606;108924608;108946130…	108748000;108748000;108748633;108748993;108748993;108768238;108768238;108768238;108782755;108798389;108798389;108798389;108798389;108798389;108798389;108832943;108832943;108832820;108832924;108832943;108835807;108835807;108835807;108835920;108841868;108843001;108867950;108867950;108871502;108871502;108872212;108872212;108883518;108883518;108897848;108897848;108897848;108924789;108924789;108946222…	+;+;+;+;+;+;+;+;+;+;+;+;+;+;+;+;+;+;+;+;+;+;+;+;+;+;+;+;+;+;+;+;+;+;+;+;+;+;+;+;+;+;+;+;+;+;+;+;+;+;+;+;+;+;+;+;+;+;+;+;+;+;+;+;+;+;+;+;+;+;+;+;+;+;+;+;+;+;+;+;+;+;+;+;+;+;+;+	13614	44	32	107	70	-1.26742	1.9179	21.6935	0.000166448	0.0151447
BOD1L1	4;4;4;4;4;4;4;4;4;4;4;4;4;4;4;4;4;4;4;4;4;4;4;4;4;4;4;4;4;4;4;4;4;4;4;4;4;4;4;4;4;4;4;4;4;4;4;4;4;4;4;4	13568738;13569506;13569786;13572702;13576838;13576838;13576838;13577403;13577403;13577403;13577581;13577582;13577582;13577582;13579928;13579928;13579928;13581020;13581020;13581132;13582230;13582237;13582652;13582652;13586396;13586396;13587699;13587699;13588722;13588722;13590386;13590386;13591923;13591923;13595860;13597104;13598946;13607117;13608530;13609295;13610934;13613506;13613512;13614196;136…	13570128;13570128;13570128;13572842;13576991;13576991;13576991;13577487;13577487;13577487;13577631;13578201;13577631;13577631;13580066;13579973;13579973;13581048;13581054;13581207;13582310;13582310;13582736;13582736;13586475;13586475;13587771;13587771;13588792;13588792;13590446;13590446;13593520;13591966;13595944;13597168;13605084;13607189;13608668;13609406;13611100;13613661;13613661;13614810;136…	-;-;-;-;-;-;-;-;-;-;-;-;-;-;-;-;-;-;-;-;-;-;-;-;-;-;-;-;-;-;-;-;-;-;-;-;-;-;-;-;-;-;-;-;-;-;-;-;-;-;-;-	15860	94	65	233	137	-1.26851	2.95741	26.854	5.1e-05	0.00647362
ZNF341	20;20;20;20;20;20;20;20;20;20;20;20;20;20;20;20;20;20;20;20;20;20;20;20;20;20;20;20;20;20;20;20;20;20;20;20;20;20;20;20;20;20;20;20;20;20;20;20;20;20;20;20;20;20;20;20;20;20;20;20;20	33731657;33731760;33732002;33732010;33740902;33740902;33740902;33740902;33745103;33745103;33745103;33748923;33748923;33748923;33748923;33753172;33753172;33753172;33753172;33757148;33757148;33757148;33757148;33758716;33758716;33758716;33758716;33761862;33761862;33761862;33761862;33766851;33766851;33766851;33766851;33770084;33770084;33770084;33770084;33781291;33781291;33781291;33783732;33783732;337…	33732052;33732052;33732052;33732052;33741012;33741012;33741012;33741012;33745299;33745299;33745299;33749072;33749072;33749072;33749072;33753423;33753423;33753423;33753423;33757343;33757343;33757343;33757322;33758806;33758806;33758806;33758806;33762055;33762055;33762055;33762055;33767041;33767041;33767041;33767041;33770292;33770292;33770292;33770292;33781387;33781387;33781387;33783864;33783864;337…	+;+;+;+;+;+;+;+;+;+;+;+;+;+;+;+;+;+;+;+;+;+;+;+;+;+;+;+;+;+;+;+;+;+;+;+;+;+;+;+;+;+;+;+;+;+;+;+;+;+;+;+;+;+;+;+;+;+;+;+;+	5457	30	25	60	68.5	-1.27329	1.47676	20.3919	0.00023	0.0185888
ZFC3H1	12;12;12;12;12;12;12;12;12;12;12;12;12;12;12;12;12;12;12;12;12;12;12;12;12;12;12;12;12;12;12;12;12;12;12;12;12;12;12;12;12;12;12;12;12;12;12;12;12;12;12;12;12;12;12;12;12;12;12;12;12;12;12;12;12;12;12;12;12;12;12;12;12;12;12;12;12;12;12;12;12;12;12;12;12;12;12;12;12;12;12;12;12;12;12;12	71609472;71609698;71610110;71610388;71610695;71610695;71610695;71611058;71611058;71611058;71611058;71611556;71611786;71613335;71613335;71613335;71613367;71614535;71614535;71614535;71614834;71614834;71614834;71615071;71615206;71615206;71619315;71619315;71619315;71619926;71619926;71619926;71620210;71620210;71623360;71623360;71624104;71624104;71626260;71626260;71627751;71627751;71628918;71628918;716…	71610565;71610565;71610757;71610565;71610757;71610757;71610757;71611254;71611286;71611887;71611097;71611887;71611887;71613748;71613435;71613435;71613435;71614700;71614700;71614700;71615148;71614938;71614938;71615316;71615316;71615316;71619409;71619409;71619409;71619965;71620124;71620124;71620315;71620315;71623597;71623597;71624292;71624292;71626446;71626446;71627934;71627934;71629037;71629037;716…	-;-;-;-;-;-;-;-;-;-;-;-;-;-;-;-;-;-;-;-;-;-;-;-;-;-;-;-;-;-;-;-;-;-;-;-;-;-;-;-;-;-;-;-;-;-;-;-;-;-;-;-;-;-;-;-;-;-;-;-;-;-;-;-;-;-;-;-;-;-;-;-;-;-;-;-;-;-;-;-;-;-;-;-;-;-;-;-;-;-;-;-;-;-;-;-	9670	104.5	90	293.5	164	-1.27686	3.25757	28.7027	3.45e-05	0.00514684
CASP8AP2	6;6;6;6;6;6;6;6;6;6;6;6;6;6;6;6;6;6;6;6;6;6;6;6;6;6;6;6;6;6;6;6;6;6;6;6;6;6;6;6;6;6;6;6;6;6;6	89829894;89829900;89829900;89829931;89829939;89829941;89846562;89846562;89846562;89846562;89846562;89846562;89853166;89853166;89853166;89853166;89853166;89853166;89854817;89854817;89854817;89854817;89854817;89854817;89855470;89855470;89855470;89855470;89855470;89855470;89857084;89857084;89857084;89857084;89857084;89857084;89862126;89862126;89862126;89862126;89865953;89865953;89871289;89871289;898…	89829934;89830106;89830067;89831339;89830106;89830067;89846644;89846644;89846644;89846644;89846644;89846644;89853234;89853234;89853234;89853234;89853234;89853234;89854917;89854917;89854917;89854917;89854917;89854917;89855544;89855544;89855544;89855544;89855544;89855544;89857199;89857199;89857349;89857199;89857199;89857199;89864371;89864371;89862793;89862793;89869082;89869082;89871388;89871388;898…	+;+;+;+;+;+;+;+;+;+;+;+;+;+;+;+;+;+;+;+;+;+;+;+;+;+;+;+;+;+;+;+;+;+;+;+;+;+;+;+;+;+;+;+;+;+;+	8171	86	73	243	131	-1.2769	2.97013	25.8449	6.36e-05	0.00766228
NPAT	11;11;11;11;11;11;11;11;11;11;11;11;11;11;11;11;11;11;11;11;11;11;11;11;11;11;11;11;11;11;11;11;11;11;11;11;11;11;11;11;11;11;11;11;11;11	108157215;108158638;108158793;108160880;108160880;108161184;108161321;108162120;108162120;108162120;108169744;108169744;108169928;108169928;108171132;108172199;108176246;108176246;108176994;108176994;108185232;108185232;108185403;108185403;108186482;108186482;108188098;108188098;108189106;108189106;108190460;108190460;108190460;108192118;108192118;108192118;108193957;108193957;108193957;108197302…	108159019;108159019;108159019;108162014;108162014;108162035;108161683;108162180;108162165;108162180;108169852;108169852;108170201;108170043;108173851;108173851;108176374;108176374;108177090;108177090;108185319;108185319;108185494;108185494;108186569;108186569;108188179;108188179;108189337;108189330;108190500;108190500;108190500;108192190;108192190;108192190;108194017;108194017;108194017;108197420…	-;-;-;-;-;-;-;-;-;-;-;-;-;-;-;-;-;-;-;-;-;-;-;-;-;-;-;-;-;-;-;-;-;-;-;-;-;-;-;-;-;-;-;-;-;-	7534	40	25	73	79	-1.28061	1.70618	21.9205	0.000157497	0.0147
ZBTB41	1;1;1;1;1;1;1;1;1;1;1;1;1;1;1;1;1;1;1;1;1	197153680;197158442;197172160;197172160;197175010;197175010;197175931;197176564;197176564;197178417;197178417;197180988;197180988;197188292;197188292;197190762;197190762;197191692;197191692;197199354;197199354	197160014;197160014;197172248;197172248;197175115;197175115;197176014;197176670;197176670;197178512;197178512;197181117;197181117;197188439;197188439;197190831;197190831;197191899;197191899;197200521;197200542	-;-;-;-;-;-;-;-;-;-;-;-;-;-;-;-;-;-;-;-;-	8562	35	19	77	51	-1.29675	1.45696	17.5703	0.000483066	0.0293635
LRRC37A4P	17;17;17;17;17;17;17;17;17;17;17;17;17;17;17;17;17;17	45506741;45508109;45508267;45508485;45510244;45510244;45513185;45513185;45513868;45513868;45517861;45519228;45521307;45539163;45539892;45542764;45545605;45547727	45508539;45508160;45508406;45508539;45510293;45510293;45513289;45513289;45515156;45515379;45518148;45519372;45521425;45539243;45539963;45542835;45545676;45550335	-;-;-;-;-;-;-;-;-;-;-;-;-;-;-;-;-;-	6924	24.75	14.83	54.08	41.33	-1.31816	1.04892	16.5818	0.00063579	0.0355134
UNC5B	10;10;10;10;10;10;10;10;10;10;10;10;10;10;10;10;10;10;10;10;10;10;10;10;10;10;10;10;10;10;10;10;10	71212570;71212927;71279821;71279821;71284720;71284720;71285326;71285326;71286689;71286689;71287598;71287598;71288568;71288568;71288958;71290915;71290915;71291432;71291432;71292467;71292467;71293405;71293405;71293700;71293700;71295811;71295811;71296578;71296578;71297909;71297909;71299112;71299112	71213064;71213064;71280045;71280045;71284863;71284863;71285429;71285429;71286869;71286869;71287765;71287765;71288732;71288732;71288990;71291109;71291109;71291821;71291821;71292554;71292554;71293573;71293573;71293933;71293933;71295960;71295960;71296742;71296742;71298090;71298090;71302864;71302864	+;+;+;+;+;+;+;+;+;+;+;+;+;+;+;+;+;+;+;+;+;+;+;+;+;+;+;+;+;+;+;+;+	6841	21	13	38	44	-1.32034	0.846259	15.23	0.000938491	0.047272
SACS	13;13;13;13;13;13;13;13;13;13;13;13;13;13;13;13;13;13;13;13;13;13;13;13;13;13;13;13;13	23328826;23328826;23328830;23328833;23341445;23353736;23353785;23353785;23353785;23353785;23354519;23354519;23354519;23354519;23354519;23358335;23358335;23358335;23365166;23365166;23365166;23368402;23368402;23368402;23371078;23375119;23375119;23375352;23411220	23341690;23341690;23329484;23329484;23341690;23353876;23353876;23353876;23353876;23353876;23355483;23354890;23356007;23356007;23356007;23358481;23358481;23358481;23365277;23365277;23365277;23368444;23368487;23368487;23371165;23375269;23375269;23375543;23411513	-;-;-;-;-;-;-;-;-;-;-;-;-;-;-;-;-;-;-;-;-;-;-;-;-;-;-;-;-	15565	447.5	310.5	1110.5	718	-1.32437	5.23138	49.5327	9.91e-07	0.000409547
C5orf42	5;5;5;5;5;5;5;5;5;5;5;5;5;5;5;5;5;5;5;5;5;5;5;5;5;5;5;5;5;5;5;5;5;5;5;5;5;5;5;5;5;5;5;5;5;5;5;5;5;5;5;5;5;5;5;5;5;5;5;5;5;5;5;5;5;5;5;5;5;5;5;5;5;5;5;5;5;5;5;5;5;5;5;5;5;5;5;5;5;5;5;5;5;5;5;5;5;5;5;5;5;5;5;5;5;5;5;5;5;5;5;5;5;5;5;5;5;5;5;5;5;5;5;5;5;5;5;5;5;5;5;5;5;5;5;5;5;5;5;5;5;5;5;5;5;5;5;5;5;5;5;5;5;5;5;5;5;5;5;5;5;5;5;5;5;5;5;5;5;5;5;5;5;5;5;5;5;5;5;5;5;5;5;5;5;5;5;5;5;5;5;5;5;5;5;5;5;5;5;5…	37106228;37106228;37106978;37106978;37108293;37108293;37108293;37108293;37114960;37114960;37114960;37114960;37120216;37120216;37120216;37120216;37120262;37121617;37121617;37121617;37121617;37121617;37122430;37122430;37122430;37122430;37124871;37125244;37125244;37125244;37125244;37125244;37138686;37138702;37138720;37138720;37138720;37138720;37138720;37138720;37138789;37139340;37139340;37139340;371…	37107778;37107778;37107778;37107778;37108471;37108471;37108471;37108471;37115049;37115049;37115049;37115049;37120340;37120340;37120340;37120340;37120340;37121784;37121784;37121784;37121784;37121784;37122488;37122488;37122488;37122488;37125013;37125409;37125409;37125440;37125409;37125409;37138848;37138848;37138848;37138848;37138848;37138848;37138848;37138848;37138848;37139370;37139587;37142480;371…	-;-;-;-;-;-;-;-;-;-;-;-;-;-;-;-;-;-;-;-;-;-;-;-;-;-;-;-;-;-;-;-;-;-;-;-;-;-;-;-;-;-;-;-;-;-;-;-;-;-;-;-;-;-;-;-;-;-;-;-;-;-;-;-;-;-;-;-;-;-;-;-;-;-;-;-;-;-;-;-;-;-;-;-;-;-;-;-;-;-;-;-;-;-;-;-;-;-;-;-;-;-;-;-;-;-;-;-;-;-;-;-;-;-;-;-;-;-;-;-;-;-;-;-;-;-;-;-	15146	70	41	168	100	-1.32494	2.48327	24.412	8.76e-05	0.00974027
USP34	2;2;2;2;2;2;2;2;2;2;2;2;2;2;2;2;2;2;2;2;2;2;2;2;2;2;2;2;2;2;2;2;2;2;2;2;2;2;2;2;2;2;2;2;2;2;2;2;2;2;2;2;2;2;2;2;2;2;2;2;2;2;2;2;2;2;2;2;2;2;2;2;2;2;2;2;2;2;2;2;2;2;2;2;2;2;2;2;2;2;2;2;2;2;2;2;2;2;2;2;2;2;2;2;2;2;2;2;2;2;2;2;2;2;2;2;2;2;2;2;2;2;2;2;2;2;2;2;2;2;2;2;2;2;2;2;2;2;2;2;2;2;2;2;2;2;2;2;2;2;2;2;2;2;2;2;2;2;2;2;2;2;2;2;2;2;2;2;2;2;2;2;2;2;2;2;2;2;2;2;2;2;2;2;2;2;2;2;2;2;2;2;2;2;2;2;2;2;2;2…	61187463;61187463;61187550;61188474;61188910;61188910;61188910;61188910;61189277;61189454;61189698;61190271;61190271;61190271;61190518;61190518;61190518;61190518;61190518;61190627;61192901;61192901;61192901;61192901;61192901;61203140;61203140;61203140;61204256;61204256;61204256;61204497;61204497;61204497;61204527;61206017;61206017;61206017;61206017;61206760;61206760;61206760;61206760;61206788;612…	61188709;61188709;61188709;61188741;61189069;61189069;61189069;61189069;61190414;61190414;61189796;61190414;61190414;61190414;61191349;61190658;61190658;61190658;61190658;61190658;61193365;61192980;61192980;61192980;61192980;61203263;61203206;61203263;61204330;61204380;61204380;61204601;61204601;61204601;61204601;61206124;61206124;61206124;61206124;61206886;61208977;61206886;61206886;61206886;612…	-;-;-;-;-;-;-;-;-;-;-;-;-;-;-;-;-;-;-;-;-;-;-;-;-;-;-;-;-;-;-;-;-;-;-;-;-;-;-;-;-;-;-;-;-;-;-;-;-;-;-;-;-;-;-;-;-;-;-;-;-;-;-;-;-;-;-;-;-;-;-;-;-;-;-;-;-;-;-;-;-;-;-;-;-;-;-;-;-;-;-;-;-;-;-;-;-;-;-;-;-;-;-;-;-;-;-;-;-;-;-;-;-;-;-;-;-;-;-;-;-;-;-;-;-;-;-;-	18125	136	91	310	241.5	-1.33611	3.51082	42.1557	3.01e-06	0.000870196
CAMK2N1	1;1;1;1	20482391;20483187;20484367;20485214	20483719;20483719;20484645;20486220	-;-;-;-	2615	187	116	316	415	-1.33674	3.92126	40.3105	4.07e-06	0.00102788
PPDPF	20;20;20;20;20;20;20;20;20;20;20;20	63520724;63520765;63520775;63520777;63521284;63521284;63521284;63521512;63521512;63521512;63521668;63521668	63520894;63520894;63520894;63520894;63521363;63521363;63521526;63521938;63521589;63521589;63521949;63522206	+;+;+;+;+;+;+;+;+;+;+;+	1094	1443.33	1104.83	2626	3604.5	-1.352	7.00154	73.88	5.14e-08	3.72e-05
ZNF37BP	10;10;10;10;10;10;10;10;10;10;10;10;10;10;10;10;10;10;10;10	42513510;42519695;42520787;42520823;42523182;42523182;42523182;42523612;42523612;42523612;42525540;42550557;42550557;42550557;42551573;42551577;42551990;42552388;42552774;42552799	42521127;42521046;42521127;42521127;42523305;42523305;42523305;42523738;42523738;42523738;42525660;42550615;42552808;42550615;42551814;42552596;42552280;42552542;42552794;42552822	-;-;-;-;-;-;-;-;-;-;-;-;-;-;-;-;-;-;-;-	10256	72	34	152.5	108	-1.3572	2.43529	25.0446	7.59e-05	0.00894335
AP000648.5	11	90193614	90198120	+	4507	19	24	67	41	-1.36402	1.20785	17.1078	0.000548769	0.0319742
PHF3	6;6;6;6;6;6;6;6;6;6;6;6;6;6;6;6;6;6;6;6;6;6;6;6;6;6;6;6;6;6;6;6;6;6;6;6;6;6;6;6;6;6;6;6;6;6;6;6;6;6;6;6;6;6;6;6;6;6;6;6;6;6;6;6;6;6;6;6;6;6;6;6;6;6;6;6;6;6;6;6;6;6;6;6;6;6;6;6;6;6;6;6;6;6;6;6;6;6;6;6;6;6;6;6	63635820;63635823;63635825;63635836;63635836;63636111;63636481;63646526;63646527;63646527;63646527;63646619;63678828;63679685;63680000;63680000;63680000;63680000;63680000;63680000;63680000;63680000;63684129;63684129;63684129;63684129;63684129;63684129;63684129;63684129;63691737;63691737;63691737;63691737;63691737;63691737;63691737;63694581;63694581;63694581;63694581;63694581;63694581;63694581;636…	63636150;63636150;63636150;63636150;63636150;63636150;63636822;63646795;63646795;63646795;63646795;63646795;63679020;63679891;63680161;63680161;63680161;63680161;63680161;63680161;63680161;63680161;63684245;63686324;63685911;63685911;63685911;63685911;63685911;63685911;63692043;63692043;63692043;63692043;63692043;63692043;63692043;63694764;63694764;63694764;63694690;63694764;63694764;63694764;636…	+;+;+;+;+;+;+;+;+;+;+;+;+;+;+;+;+;+;+;+;+;+;+;+;+;+;+;+;+;+;+;+;+;+;+;+;+;+;+;+;+;+;+;+;+;+;+;+;+;+;+;+;+;+;+;+;+;+;+;+;+;+;+;+;+;+;+;+;+;+;+;+;+;+;+;+;+;+;+;+;+;+;+;+;+;+;+;+;+;+;+;+;+;+;+;+;+;+;+;+;+;+;+;+	10378	216	121	561.5	283	-1.38244	4.10125	29.4722	2.95e-05	0.00463864
CEP350	1;1;1;1;1;1;1;1;1;1;1;1;1;1;1;1;1;1;1;1;1;1;1;1;1;1;1;1;1;1;1;1;1;1;1;1;1;1;1;1;1;1;1;1;1;1;1;1;1;1;1;1;1;1;1;1;1;1;1;1;1;1;1;1;1;1;1;1;1;1;1;1;1;1;1;1;1;1;1;1;1;1;1;1;1;1;1;1;1;1;1;1;1;1;1	179954738;179954773;179986169;179986181;179986182;179987240;179987243;179987243;179990507;179990507;179992062;179992062;179992062;179996553;179996553;180003174;180006454;180011929;180013847;180015849;180019949;180022698;180024419;180031320;180033862;180036926;180041138;180041203;180041662;180041662;180041662;180043056;180043056;180044051;180044051;180044051;180048536;180048536;180048536;180052224…	179955142;179955142;179986254;179986254;179986254;179987286;179987286;179987286;179990621;179990621;179992221;179992221;179992221;179996963;179997175;180003287;180006567;180012075;180014505;180015970;180021009;180022848;180024582;180031494;180034082;180037089;180041248;180041248;180041802;180041802;180041802;180043192;180043192;180044173;180044173;180044173;180048705;180048705;180048705;180052316…	+;+;+;+;+;+;+;+;+;+;+;+;+;+;+;+;+;+;+;+;+;+;+;+;+;+;+;+;+;+;+;+;+;+;+;+;+;+;+;+;+;+;+;+;+;+;+;+;+;+;+;+;+;+;+;+;+;+;+;+;+;+;+;+;+;+;+;+;+;+;+;+;+;+;+;+;+;+;+;+;+;+;+;+;+;+;+;+;+;+;+;+;+;+;+	14301	58	42	147	105	-1.38289	2.38348	31.6508	1.91e-05	0.00333533
DMXL2	15;15;15;15;15;15;15;15;15;15;15;15;15;15;15;15;15;15;15;15;15;15;15;15;15;15;15;15;15;15;15;15;15;15;15;15;15;15;15;15;15;15;15;15;15;15;15;15;15;15;15;15;15;15;15;15;15;15;15;15;15;15;15;15;15;15;15;15;15;15;15;15;15;15;15;15;15;15;15;15;15;15;15;15;15;15;15;15;15;15;15;15;15;15;15;15;15;15;15;15;15;15;15;15;15;15;15;15;15;15;15;15;15;15;15;15;15;15;15;15;15;15;15;15;15;15;15;15;15;15;15;15;15;…	51447711;51447776;51447788;51447791;51448812;51450129;51450129;51450129;51450129;51450129;51450195;51451645;51451645;51451645;51451645;51453248;51453550;51453550;51453550;51453550;51453550;51455151;51455151;51455151;51455151;51455151;51455151;51456066;51456066;51456066;51456066;51456066;51456309;51456309;51456309;51456309;51456309;51456313;51456325;51457328;51457328;51457328;51457328;51457328;514…	51449193;51449193;51449193;51449193;51449193;51450673;51450346;51450346;51450346;51450346;51450346;51451697;51451697;51451697;51451697;51453641;51453641;51453641;51453641;51453641;51453641;51455213;51455228;51455228;51455228;51455228;51455228;51456193;51456193;51456193;51456193;51456193;51456318;51456369;51456369;51456369;51456369;51456369;51456369;51457466;51457466;51457466;51457466;51457466;514…	-;-;-;-;-;-;-;-;-;-;-;-;-;-;-;-;-;-;-;-;-;-;-;-;-;-;-;-;-;-;-;-;-;-;-;-;-;-;-;-;-;-;-;-;-;-;-;-;-;-;-;-;-;-;-;-;-;-;-;-;-;-;-;-;-;-;-;-;-;-;-;-;-;-;-;-;-;-;-;-;-;-;-;-;-;-;-;-;-;-;-;-;-;-;-;-;-;-;-;-;-;-;-;-;-;-;-;-;-;-;-;-;-;-;-;-;-;-;-;-;-;-;-;-;-;-;-;-	13807	43	28	107	72	-1.38387	1.90094	25.1448	7.43e-05	0.00887838
FANCM	14;14;14;14;14;14;14;14;14;14;14;14;14;14;14;14;14;14;14;14;14;14;14;14;14;14;14;14;14;14;14;14;14;14;14;14;14;14;14;14;14;14;14;14;14;14;14;14;14;14;14;14;14;14;14;14;14;14;14;14;14;14;14;14;14;14;14;14;14;14;14;14;14;14;14;14;14;14;14;14;14;14;14;14;14;14;14;14;14;14;14;14;14;14;14;14;14;14;14	45135940;45135947;45135954;45136514;45137069;45137069;45137069;45137069;45140632;45140632;45148837;45148837;45148837;45151397;45151397;45151397;45153920;45153920;45153920;45154697;45154697;45154697;45154759;45155373;45155373;45155373;45155373;45159096;45159096;45159096;45159096;45164359;45164359;45164359;45166950;45166950;45166950;45166950;45170589;45170589;45170589;45173055;45173055;45173055;451…	45136539;45136539;45136539;45136539;45137959;45137241;45137241;45137241;45140709;45140709;45148995;45148995;45148995;45151528;45151528;45151528;45154052;45154052;45154052;45154822;45154822;45154822;45154822;45155459;45155459;45155459;45155459;45159280;45159280;45159280;45159280;45164565;45164565;45164565;45167163;45167163;45167163;45167423;45170746;45170746;45170746;45173210;45173210;45173210;451…	+;+;+;+;+;+;+;+;+;+;+;+;+;+;+;+;+;+;+;+;+;+;+;+;+;+;+;+;+;+;+;+;+;+;+;+;+;+;+;+;+;+;+;+;+;+;+;+;+;+;+;+;+;+;+;+;+;+;+;+;+;+;+;+;+;+;+;+;+;+;+;+;+;+;+;+;+;+;+;+;+;+;+;+;+;+;+;+;+;+;+;+;+;+;+;+;+;+;+	8468	38	17	85	54	-1.3919	1.54385	18.7086	0.00035554	0.024348
RP3-368A4.5	X;X	74200229;74241933	74203909;74242148	-;-	3897	41	21	108	50	-1.39968	1.71735	17.0618	0.000555822	0.0319742
CEP295	11;11;11;11;11;11;11;11;11;11;11;11;11;11;11;11;11;11;11;11;11;11;11;11;11;11;11;11;11;11;11;11;11;11;11;11;11;11;11;11;11;11;11;11;11;11;11;11;11;11;11;11;11;11;11;11;11;11;11;11;11;11;11;11;11;11;11;11;11;11;11	93661639;93666682;93667607;93668808;93669677;93675571;93679412;93683559;93683964;93687644;93691681;93691683;93691705;93691927;93691927;93695497;93695497;93695497;93695530;93696320;93696320;93696320;93696682;93696682;93696682;93698908;93702460;93702460;93702460;93702776;93706745;93706745;93706745;93721312;93721312;93721312;93721954;93721954;93722502;93723041;93723041;93723041;93723399;93724254;937…	93661774;93666815;93667807;93668932;93669770;93675666;93679552;93683742;93684128;93687865;93691775;93691775;93691775;93692030;93692030;93695620;93695673;93695634;93695673;93696417;93696417;93696417;93696975;93696854;93700186;93700186;93702637;93702637;93702637;93702919;93706897;93706897;93706897;93721412;93721412;93721412;93722050;93722050;93723289;93723064;93723289;93723289;93724375;93724375;937…	+;+;+;+;+;+;+;+;+;+;+;+;+;+;+;+;+;+;+;+;+;+;+;+;+;+;+;+;+;+;+;+;+;+;+;+;+;+;+;+;+;+;+;+;+;+;+;+;+;+;+;+;+;+;+;+;+;+;+;+;+;+;+;+;+;+;+;+;+;+;+	9495	82	49	188.5	146	-1.40882	2.77766	35.9407	8.61e-06	0.00180271
ANKRD36B	2;2;2;2;2;2;2;2;2;2;2;2;2;2;2;2;2;2;2;2;2;2;2;2;2;2;2;2;2;2;2;2;2;2;2;2;2;2;2;2;2;2;2;2;2;2;2;2;2;2;2;2;2;2;2;2;2;2;2;2;2;2;2;2;2;2;2;2;2;2;2;2;2;2;2;2;2;2;2;2;2;2;2;2;2;2;2;2;2;2;2;2;2;2;2;2;2;2;2;2;2;2;2;2;2;2;2;2;2;2;2;2;2;2;2;2;2;2;2;2;2;2;2;2;2;2;2;2;2;2;2;2;2;2;2;2;2;2;2;2;2;2;2;2;2;2;2;2;2;2;2;2;2;2;2;2;2;2;2;2;2;2;2;2;2;2;2;2;2;2;2;2;2;2;2;2;2;2;2;2;2;2	97492663;97492666;97492667;97504798;97504798;97506964;97507036;97507036;97507036;97507036;97507036;97507564;97507564;97507564;97507564;97507564;97507564;97507995;97507995;97507995;97507995;97509581;97509581;97509581;97509581;97509581;97511138;97511138;97511138;97511138;97511138;97513180;97513180;97513180;97515732;97515732;97515732;97523326;97523326;97523326;97532311;97532311;97532311;97536300;975…	97492855;97492855;97492855;97506435;97506435;97507065;97507065;97507065;97507065;97507065;97507065;97507719;97507657;97507657;97508065;97507657;97507657;97508065;97508065;97508065;97508065;97509733;97509733;97509733;97509733;97509733;97512052;97511249;97512052;97511609;97512052;97513363;97513363;97513363;97515945;97515945;97515945;97523467;97523467;97523467;97532384;97532384;97532384;97536372;975…	-;-;-;-;-;-;-;-;-;-;-;-;-;-;-;-;-;-;-;-;-;-;-;-;-;-;-;-;-;-;-;-;-;-;-;-;-;-;-;-;-;-;-;-;-;-;-;-;-;-;-;-;-;-;-;-;-;-;-;-;-;-;-;-;-;-;-;-;-;-;-;-;-;-;-;-;-;-;-;-;-;-;-;-;-;-;-;-;-;-;-;-;-;-;-;-;-;-;-;-;-;-;-;-;-;-;-;-;-;-;-;-;-;-;-;-;-;-;-;-;-;-;-;-;-;-;-;-	6771	14.67	12.5	41	30	-1.42622	0.622146	15.7063	0.000816609	0.0435937
VPS13C	15;15;15;15;15;15;15;15;15;15;15;15;15;15;15;15;15;15;15;15;15;15;15;15;15;15;15;15;15;15;15;15;15;15;15;15;15;15;15;15;15;15;15;15;15;15;15;15;15;15;15;15;15;15;15;15;15;15;15;15;15;15;15;15;15;15;15;15;15;15;15;15;15;15;15;15;15;15;15;15;15;15;15;15;15;15;15;15;15;15;15;15;15;15;15;15;15;15;15;15;15;15;15;15;15;15;15;15;15;15;15;15;15;15;15;15;15;15;15;15;15;15;15;15;15;15;15;15;15;15;15;15;15;…	61852389;61852393;61852404;61854413;61854871;61854871;61854871;61854871;61856286;61856286;61856286;61856286;61863440;61863440;61863440;61864306;61867744;61868659;61868659;61868659;61868659;61869500;61869500;61869500;61869500;61871989;61871989;61871989;61871989;61873246;61873246;61873246;61873246;61874876;61874876;61874876;61874876;61875732;61875732;61875732;61875732;61875787;61876973;61876973;618…	61854558;61854558;61854558;61854558;61854954;61854954;61854954;61854954;61856409;61856793;61856409;61856409;61864760;61863528;61863528;61867947;61867947;61868773;61868773;61868773;61868773;61869623;61869623;61869623;61869623;61872034;61872034;61872034;61872034;61873409;61873409;61873409;61873409;61874951;61874951;61874951;61874951;61875845;61875845;61875845;61875845;61875845;61877086;61877054;618…	-;-;-;-;-;-;-;-;-;-;-;-;-;-;-;-;-;-;-;-;-;-;-;-;-;-;-;-;-;-;-;-;-;-;-;-;-;-;-;-;-;-;-;-;-;-;-;-;-;-;-;-;-;-;-;-;-;-;-;-;-;-;-;-;-;-;-;-;-;-;-;-;-;-;-;-;-;-;-;-;-;-;-;-;-;-;-;-;-;-;-;-;-;-;-;-;-;-;-;-;-;-;-;-;-;-;-;-;-;-;-;-;-;-;-;-;-;-;-;-;-;-;-;-;-;-;-;-	18992	70	26	166	82	-1.42944	2.34099	18.448	0.000381041	0.0252868
BDP1	5;5;5;5;5;5;5;5;5;5;5;5;5;5;5;5;5;5;5;5;5;5;5;5;5;5;5;5;5;5;5;5;5;5;5;5;5;5;5;5;5;5;5;5;5;5;5;5;5;5;5;5;5;5;5;5;5;5;5;5;5;5;5;5;5;5;5;5;5;5;5;5;5;5;5;5;5;5;5;5;5;5;5;5;5;5;5;5;5;5;5;5;5;5;5;5;5;5;5;5;5;5;5;5;5;5;5;5;5;5;5;5;5;5;5;5;5;5;5;5;5;5;5;5;5	71455615;71455659;71455686;71458579;71458579;71458579;71461817;71461817;71461817;71464058;71464058;71464058;71466096;71466096;71466096;71467354;71467354;71467354;71470395;71470395;71470395;71483842;71483842;71483842;71486484;71486484;71486484;71489404;71489404;71489404;71490984;71490984;71490984;71494465;71495250;71495250;71495250;71497270;71497270;71497270;71497270;71501562;71501562;71501562;715…	71456089;71456089;71456089;71458855;71458855;71458855;71461926;71461926;71461926;71464117;71464117;71464117;71466221;71466221;71466221;71467487;71467487;71467487;71470489;71470489;71470489;71483896;71483896;71483896;71486627;71486627;71486627;71489682;71489682;71489682;71491131;71491131;71491131;71495408;71495408;71495408;71495408;71497426;71497426;71497426;71497426;71501653;71501653;71501653;715…	+;+;+;+;+;+;+;+;+;+;+;+;+;+;+;+;+;+;+;+;+;+;+;+;+;+;+;+;+;+;+;+;+;+;+;+;+;+;+;+;+;+;+;+;+;+;+;+;+;+;+;+;+;+;+;+;+;+;+;+;+;+;+;+;+;+;+;+;+;+;+;+;+;+;+;+;+;+;+;+;+;+;+;+;+;+;+;+;+;+;+;+;+;+;+;+;+;+;+;+;+;+;+;+;+;+;+;+;+;+;+;+;+;+;+;+;+;+;+;+;+;+;+;+;+	12436	170	127	497	278.5	-1.43248	3.96786	40.3028	4.07e-06	0.00102788
RP11-180C16.1	7	131493964	131497694	-	3731	30	16	73.5	48	-1.45127	1.3432	20.4718	0.000225404	0.018528
CEP135	4;4;4;4;4;4;4;4;4;4;4;4;4;4;4;4;4;4;4;4;4;4;4;4;4;4;4;4;4;4;4;4;4;4;4;4;4;4;4;4;4;4;4;4;4;4;4;4;4;4;4;4;4;4;4;4;4;4	55948871;55948945;55948981;55952086;55952086;55952086;55953085;55953085;55954216;55954216;55954278;55957223;55957223;55957223;55959682;55959682;55959682;55964274;55964274;55964866;55965644;55965644;55969063;55969063;55971270;55971270;55974746;55974746;55980143;55980143;55981227;55981227;55985281;55985281;55991934;55991934;55999302;55999302;55999491;55999491;56008327;56008327;56009735;56009735;560…	55949059;55949059;55949059;55952553;55952243;55952243;55953275;55953275;55954383;55954383;55954383;55957364;55957364;55957364;55959766;55959766;55960925;55964402;55964402;55965859;55966580;55965859;55969128;55969128;55971408;55971408;55974969;55974969;55980295;55980295;55981379;55981379;55985358;55985358;55992085;55992085;55999417;55999417;55999645;55999645;56008382;56008382;56009903;56009903;560…	+;+;+;+;+;+;+;+;+;+;+;+;+;+;+;+;+;+;+;+;+;+;+;+;+;+;+;+;+;+;+;+;+;+;+;+;+;+;+;+;+;+;+;+;+;+;+;+;+;+;+;+;+;+;+;+;+;+	8640	101.5	48	261.5	131.5	-1.45247	2.98856	24.857	7.92e-05	0.00911664
RANBP2	2;2;2;2;2;2;2;2;2;2;2;2;2;2;2;2;2;2;2;2;2;2;2;2;2;2;2;2;2;2;2;2;2;2;2;2;2;2;2;2	108719481;108719553;108719607;108729132;108729132;108729132;108730774;108730817;108731322;108731322;108731322;108731322;108735532;108735532;108736104;108740489;108746711;108748920;108751264;108751528;108751551;108751871;108752998;108752998;108753426;108753825;108754905;108755176;108758413;108762101;108763237;108771701;108772489;108772868;108775732;108777130;108781269;108782128;108782528;108783596	108719678;108719678;108719678;108729199;108729199;108729199;108730885;108730885;108731337;108731898;108731474;108731474;108735551;108735762;108736249;108740681;108746798;108749129;108751445;108751703;108751994;108751994;108753097;108753159;108753563;108753971;108755084;108755259;108758548;108762195;108768388;108771871;108772581;108773046;108775936;108777231;108781429;108782401;108782862;108785811	+;+;+;+;+;+;+;+;+;+;+;+;+;+;+;+;+;+;+;+;+;+;+;+;+;+;+;+;+;+;+;+;+;+;+;+;+;+;+;+	12302	288.92	158.83	754.17	439.12	-1.47468	4.57447	40.986	3.64e-06	0.000992962
CEP290	12;12;12;12;12;12;12;12;12;12;12;12;12;12;12;12;12;12;12;12;12;12;12;12;12;12;12;12;12;12;12;12;12;12;12;12;12;12;12;12;12;12;12;12;12;12;12;12;12;12;12;12;12;12;12;12;12;12;12;12;12;12;12;12;12;12;12;12;12;12;12;12;12;12;12;12;12;12;12;12;12;12;12;12;12;12;12;12;12;12;12;12;12;12;12;12;12;12;12;12;12;12;12;12;12;12;12;12;12;12;12;12;12;12;12;12;12;12;12;12;12;12;12;12;12;12;12;12;12;12;12;12;12;…	88049014;88049016;88049020;88050354;88050354;88050354;88053652;88053652;88053652;88054340;88054340;88054340;88055576;88055576;88055576;88058848;88058848;88058848;88059898;88059898;88059898;88060830;88060830;88060830;88062692;88062692;88062692;88063981;88063981;88063981;88068522;88068522;88068522;88071294;88071294;88071294;88071781;88071781;88071781;88077222;88077222;88077222;88077697;88077697;880…	88049414;88049414;88049414;88050433;88050433;88050433;88053746;88053746;88053746;88054413;88054413;88054413;88055717;88055717;88055717;88059020;88059020;88059020;88060020;88060020;88060020;88060994;88060994;88060994;88062778;88062778;88062778;88064115;88064115;88064115;88068645;88068645;88068645;88071449;88071449;88071449;88071926;88071926;88071926;88077344;88077344;88077344;88077918;88077918;880…	-;-;-;-;-;-;-;-;-;-;-;-;-;-;-;-;-;-;-;-;-;-;-;-;-;-;-;-;-;-;-;-;-;-;-;-;-;-;-;-;-;-;-;-;-;-;-;-;-;-;-;-;-;-;-;-;-;-;-;-;-;-;-;-;-;-;-;-;-;-;-;-;-;-;-;-;-;-;-;-;-;-;-;-;-;-;-;-;-;-;-;-;-;-;-;-;-;-;-;-;-;-;-;-;-;-;-;-;-;-;-;-;-;-;-;-;-;-;-;-;-;-;-;-;-;-;-;-	10388	61	34	170.5	85	-1.47873	2.37195	24.4328	8.72e-05	0.00974027
UTRN	6;6;6;6;6;6;6;6;6;6;6;6;6;6;6;6;6;6;6;6;6;6;6;6;6;6;6;6;6;6;6;6;6;6;6;6;6;6;6;6;6;6;6;6;6;6;6;6;6;6;6;6;6;6;6;6;6;6;6;6;6;6;6;6;6;6;6;6;6;6;6;6;6;6;6;6;6;6;6;6;6;6;6;6;6;6;6;6;6;6;6;6;6;6;6;6;6;6;6;6;6;6;6;6;6;6;6;6;6;6;6;6;6;6;6;6;6;6;6;6;6;6;6;6;6;6;6;6;6;6;6;6;6;6;6;6;6;6;6;6;6;6;6;6;6;6;6;6	144285701;144291737;144291829;144330820;144344101;144403123;144403123;144403123;144403123;144421878;144421878;144421878;144423549;144423549;144423549;144423986;144423986;144423986;144426287;144426287;144426287;144428778;144429581;144435935;144437565;144438745;144440352;144444281;144447211;144447602;144448600;144451370;144453782;144458770;144459174;144461197;144462654;144473720;144474604;144479812…	144285821;144291907;144291907;144331018;144344304;144403184;144403184;144403184;144403184;144421970;144421970;144421970;144423626;144423626;144423626;144424078;144424078;144424078;144426328;144426358;144426459;144428893;144429741;144436138;144437746;144438895;144440471;144444382;144447318;144447781;144448769;144451493;144453869;144459011;144459354;144461342;144462866;144473833;144474759;144479982…	+;+;+;+;+;+;+;+;+;+;+;+;+;+;+;+;+;+;+;+;+;+;+;+;+;+;+;+;+;+;+;+;+;+;+;+;+;+;+;+;+;+;+;+;+;+;+;+;+;+;+;+;+;+;+;+;+;+;+;+;+;+;+;+;+;+;+;+;+;+;+;+;+;+;+;+;+;+;+;+;+;+;+;+;+;+;+;+;+;+;+;+;+;+;+;+;+;+;+;+;+;+;+;+;+;+;+;+;+;+;+;+;+;+;+;+;+;+;+;+;+;+;+;+;+;+;+;+	14604	177	112	445	330	-1.48045	3.95758	52.6977	6.38e-07	0.000297714
LINC00342	2;2;2;2;2;2;2	95807118;95807118;95813316;95813909;95814050;95814050;95814671	95807302;95807302;95813533;95813957;95814145;95816215;95814776	-;-;-;-;-;-;-	2618	41	16	91.67	62	-1.4879	1.65828	21.2379	0.000186164	0.0163226
SIRPB3P	20;20;20;20;20	1665283;1669915;1670881;1697392;1708129	1665394;1670241;1671197;1697779;1708200	-;-;-;-;-	1216	18	17	46	50	-1.49931	1.01542	22.0599	0.000152267	0.0143977
ATAD5	17;17;17;17;17;17;17;17;17;17;17;17;17;17;17;17;17;17;17;17;17;17;17;17;17;17;17;17;17;17;17;17;17;17;17;17;17;17;17;17;17;17;17;17;17;17;17;17;17;17;17	30831970;30831970;30834148;30834148;30835209;30837206;30837206;30837206;30840617;30840617;30840617;30843913;30843913;30843913;30844835;30844835;30844835;30855143;30855143;30855143;30856955;30856955;30856955;30858161;30858161;30858161;30860433;30860433;30860433;30865704;30865704;30865704;30868333;30868333;30868333;30869248;30869248;30869248;30869496;30869496;30869496;30876374;30876374;30877416;308…	30832413;30832413;30836048;30836048;30836048;30837314;30837314;30837314;30840781;30840781;30840781;30844039;30844039;30844039;30844916;30844916;30844916;30855327;30855327;30855327;30857112;30857112;30857112;30858323;30858323;30858323;30860612;30860612;30860612;30865800;30865800;30865800;30868412;30868412;30868412;30869390;30869390;30869390;30869852;30869646;30869646;30876550;30876439;30877549;308…	+;+;+;+;+;+;+;+;+;+;+;+;+;+;+;+;+;+;+;+;+;+;+;+;+;+;+;+;+;+;+;+;+;+;+;+;+;+;+;+;+;+;+;+;+;+;+;+;+;+;+	7075	55	44	175	99	-1.51282	2.46508	32.3655	1.67e-05	0.00309232
JMJD1C	10;10;10;10;10;10;10;10;10;10;10;10;10;10;10;10;10;10;10;10;10;10;10;10;10;10;10;10;10;10;10;10;10;10;10;10;10;10;10;10;10;10;10;10;10;10;10;10;10;10;10;10;10;10;10;10;10;10;10;10;10;10;10;10;10;10;10;10;10;10;10;10;10;10;10;10;10;10;10;10;10;10;10;10;10;10;10;10;10;10;10;10;10;10;10;10;10;10;10;10;10;10;10;10;10;10;10;10;10;10	63167221;63167221;63167348;63167590;63168435;63168435;63168435;63168435;63176297;63176297;63176297;63176297;63176800;63177717;63177717;63177717;63183447;63183447;63183447;63183447;63184608;63184608;63184608;63184608;63185563;63185563;63185563;63185563;63186215;63186215;63186215;63186215;63189168;63189168;63189168;63189168;63189287;63190894;63190894;63190894;63190894;63190894;63192938;63192938;631…	63168134;63168134;63168109;63168134;63168566;63168566;63168566;63168566;63176473;63176473;63176555;63176473;63177856;63177856;63177856;63177856;63183569;63183569;63183569;63183569;63184738;63184738;63184738;63184738;63185653;63185653;63185653;63185653;63186383;63186383;63186383;63186383;63189446;63189446;63189446;63189446;63189446;63191108;63191108;63191108;63191108;63191108;63193337;63193151;631…	-;-;-;-;-;-;-;-;-;-;-;-;-;-;-;-;-;-;-;-;-;-;-;-;-;-;-;-;-;-;-;-;-;-;-;-;-;-;-;-;-;-;-;-;-;-;-;-;-;-;-;-;-;-;-;-;-;-;-;-;-;-;-;-;-;-;-;-;-;-;-;-;-;-;-;-;-;-;-;-;-;-;-;-;-;-;-;-;-;-;-;-;-;-;-;-;-;-;-;-;-;-;-;-;-;-;-;-;-;-	11059	151	89.5	423	239	-1.51601	3.71859	39.1025	4.98e-06	0.00116098
NIPBL	5;5;5;5;5;5;5;5;5;5;5;5;5;5;5;5;5;5;5;5;5;5;5;5;5;5;5;5;5;5;5;5;5;5;5;5;5;5;5;5;5;5;5;5;5;5;5;5;5;5;5;5;5;5;5;5;5;5;5;5;5;5;5;5;5;5;5;5;5;5;5;5;5;5;5;5;5;5;5;5;5;5;5;5;5;5;5;5;5;5;5;5;5;5;5;5;5;5;5;5;5;5;5;5;5;5;5;5;5;5;5;5;5;5;5;5;5;5;5;5;5;5;5;5	36876759;36876790;36877001;36953618;36953618;36954968;36955472;36955472;36955472;36958104;36958104;36958104;36961484;36961484;36961484;36961506;36962123;36962123;36962123;36962123;36970876;36970876;36970876;36970876;36971945;36971945;36971945;36971945;36975776;36975776;36975776;36975776;36984676;36984676;36984676;36995150;36995622;36995622;36995622;36995750;36996472;36996472;37000373;37000373;370…	36877178;36877178;36877022;36953760;36953760;36955010;36955637;36955637;36955637;36958231;36958231;36958231;36961583;36961583;36961583;36961583;36962274;36962274;36962274;36962274;36971036;36971036;36971036;36971036;36972041;36972041;36972041;36972041;36976402;36975897;36976402;36976402;36986301;36986301;36986301;36995804;36995804;36995804;36995804;36995804;36997002;36997002;37000506;37000570;370…	+;+;+;+;+;+;+;+;+;+;+;+;+;+;+;+;+;+;+;+;+;+;+;+;+;+;+;+;+;+;+;+;+;+;+;+;+;+;+;+;+;+;+;+;+;+;+;+;+;+;+;+;+;+;+;+;+;+;+;+;+;+;+;+;+;+;+;+;+;+;+;+;+;+;+;+;+;+;+;+;+;+;+;+;+;+;+;+;+;+;+;+;+;+;+;+;+;+;+;+;+;+;+;+;+;+;+;+;+;+;+;+;+;+;+;+;+;+;+;+;+;+;+;+	12529	235	136	635	388	-1.52193	4.3419	46.191	1.61e-06	0.000614483
RP5-1087E8.3	1;1;1	226992140;226992393;226993070	226992224;226992610;226993206	+;+;+	440	22	22	65.5	58.5	-1.53688	1.35588	27.5309	4.41e-05	0.00593867
APC	5;5;5;5;5;5;5;5;5;5;5;5;5;5;5;5;5;5;5;5;5;5;5;5;5;5;5;5;5;5;5;5;5;5;5;5;5;5;5;5;5;5;5;5;5;5;5;5;5;5;5;5;5;5;5;5;5;5;5;5;5;5;5;5;5;5;5;5;5;5;5;5;5;5;5;5;5;5;5;5;5;5;5;5;5;5;5;5;5;5;5;5;5;5;5;5;5;5;5;5	112707498;112707521;112707522;112737885;112737888;112737895;112738332;112738353;112754873;112754873;112754873;112754873;112754873;112754873;112766326;112766326;112766326;112766326;112766326;112766326;112766326;112767189;112767189;112767189;112767189;112767189;112767189;112775629;112775629;112775629;112775629;112775629;112780790;112780790;112780790;112780790;112780790;112792446;112792446;112792446…	112707649;112707882;112707882;112737925;112737925;112737925;112738460;112738460;112755025;112755025;112755025;112755025;112755025;112755025;112766410;112766410;112766410;112766410;112766410;112766410;112766383;112767390;112767390;112767390;112767390;112767390;112767322;112775737;112775737;112775737;112775737;112775737;112780903;112780903;112780903;112780903;112780903;112792529;112792529;112792529…	+;+;+;+;+;+;+;+;+;+;+;+;+;+;+;+;+;+;+;+;+;+;+;+;+;+;+;+;+;+;+;+;+;+;+;+;+;+;+;+;+;+;+;+;+;+;+;+;+;+;+;+;+;+;+;+;+;+;+;+;+;+;+;+;+;+;+;+;+;+;+;+;+;+;+;+;+;+;+;+;+;+;+;+;+;+;+;+;+;+;+;+;+;+;+;+;+;+;+;+	12440	97.5	51.5	246.5	172.5	-1.55051	3.05912	40.2287	4.12e-06	0.00102788
RNA5-8S5	21;21;21;21;GL000220.1;GL000220.1;KI270733.1;KI270733.1	8212572;8256781;8395607;8439823;112025;155997;128877;173956	8212724;8256933;8395759;8439975;112177;156149;129029;174108	+;+;+;+;+;+;+;+	1224	16.24	22.37	81.15	29.85	-1.55308	1.19291	14.9396	0.00102262	0.0498123
CFH	1;1;1;1;1;1;1;1;1;1;1;1;1;1;1;1;1;1;1;1;1;1;1;1;1;1;1;1;1;1;1;1;1;1;1;1;1;1;1;1;1;1;1;1;1;1;1;1;1;1;1;1;1;1;1;1;1;1;1;1;1;1	196651878;196652045;196652056;196652056;196672978;196672978;196672978;196672978;196673857;196673857;196673857;196675989;196675989;196675989;196676988;196677476;196677476;196679623;196679623;196679623;196685064;196685064;196685064;196685064;196689420;196689420;196689420;196689420;196690063;196690063;196690063;196690063;196701318;196701318;196713735;196713735;196715593;196715593;196725121;196725121…	196652175;196652175;196652175;196652175;196673407;196673163;196673163;196673163;196673962;196673962;196673962;196676065;196676065;196676065;196679793;196677667;196677667;196679793;196679793;196679793;196685237;196685237;196685237;196685237;196689614;196689614;196689614;196689614;196690239;196690239;196690239;196690239;196701565;196701566;196713917;196713917;196715769;196715769;196725297;196725297…	+;+;+;+;+;+;+;+;+;+;+;+;+;+;+;+;+;+;+;+;+;+;+;+;+;+;+;+;+;+;+;+;+;+;+;+;+;+;+;+;+;+;+;+;+;+;+;+;+;+;+;+;+;+;+;+;+;+;+;+;+;+	8145	14	12	43	32.5	-1.57758	0.66757	19.4951	0.000289332	0.0214654
RP11-206L10.9	1;1;1;1;1;1;1;1;1;1;1;1;1;1;1;1;1;1;1;1;1;1;1;1;1;1;1;1;1;1;1;1;1;1;1;1;1;1;1;1;1;1;1;1;1;1;1;1;1;1;1;1;1;1;1;1;1;1;1;1;1	778770;778782;778930;778937;779056;781937;781937;781937;781937;783111;783111;784370;784370;784370;784370;784370;784370;784370;784370;784370;784370;784370;784370;784370;784370;784396;785800;786393;792882;792882;795470;795470;795470;801607;803567;803567;803919;803919;803919;803919;803919;803922;803951;803951;804776;804776;804776;804776;804776;804776;804776;804799;804932;806386;807217;807217;807217;…	779092;779092;779092;779092;779092;782136;782136;782191;782043;783363;783363;784493;784493;784493;784493;784493;784493;784493;784759;784977;784493;784493;784429;784655;784690;784493;787672;786866;793041;793041;795582;795513;795582;801876;803667;803667;804222;804222;804222;804222;804222;804222;804222;804222;804966;804966;804966;805270;805127;804832;804875;804966;804966;806459;807465;807321;807323;…	+;+;+;+;+;+;+;+;+;+;+;+;+;+;+;+;+;+;+;+;+;+;+;+;+;+;+;+;+;+;+;+;+;+;+;+;+;+;+;+;+;+;+;+;+;+;+;+;+;+;+;+;+;+;+;+;+;+;+;+;+	5517	11.25	10.5	32.5	31	-1.58433	0.437373	17.6449	0.000473318	0.0291413
CHD9	16;16;16;16;16;16;16;16;16;16;16;16;16;16;16;16;16;16;16;16;16;16;16;16;16;16;16;16;16;16;16;16;16;16;16;16;16;16;16;16;16;16;16;16;16;16;16;16;16;16;16;16;16;16;16;16;16;16;16;16;16;16;16;16;16;16;16;16;16;16;16;16;16;16;16;16;16;16;16;16;16;16;16;16;16;16;16;16;16;16;16;16;16;16;16;16;16;16;16;16;16;16;16;16;16;16;16;16;16;16;16;16;16;16;16;16;16;16;16;16;16;16;16;16;16;16;16;16;16;16;16;16;16;…	53055033;53055033;53055033;53055039;53099160;53099180;53121300;53121300;53130921;53131134;53155926;53155926;53155926;53155926;53155926;53155926;53156003;53156006;53156543;53157164;53157249;53207989;53208032;53208451;53209482;53209482;53209482;53209482;53209482;53209482;53209482;53209482;53209482;53209482;53209705;53209780;53222644;53222644;53222644;53222644;53222644;53222644;53222644;53222644;532…	53055077;53055077;53055077;53055077;53099268;53099268;53122178;53121980;53131058;53131298;53156248;53157541;53157541;53157541;53157541;53157541;53157541;53156150;53156734;53157541;53157462;53208347;53208347;53208709;53209541;53209813;53209813;53209813;53209813;53209813;53209813;53209813;53209813;53209813;53209813;53209813;53222755;53222755;53222755;53222755;53222755;53222755;53222755;53222755;532…	+;+;+;+;+;+;+;+;+;+;+;+;+;+;+;+;+;+;+;+;+;+;+;+;+;+;+;+;+;+;+;+;+;+;+;+;+;+;+;+;+;+;+;+;+;+;+;+;+;+;+;+;+;+;+;+;+;+;+;+;+;+;+;+;+;+;+;+;+;+;+;+;+;+;+;+;+;+;+;+;+;+;+;+;+;+;+;+;+;+;+;+;+;+;+;+;+;+;+;+;+;+;+;+;+;+;+;+;+;+;+;+;+;+;+;+;+;+;+;+;+;+;+;+;+;+;+;+	16502	41	27	129	70.5	-1.59951	1.99531	29.1258	3.17e-05	0.0048724
KIAA1551	12;12;12;12;12;12;12;12;12;12;12;12;12;12;12;12;12;12;12;12;12;12;12;12;12;12;12;12;12	31959370;31959408;31959419;31959438;31959449;31959663;31960777;31960777;31960777;31960777;31960777;31960777;31962489;31970189;31970189;31970189;31970189;31980878;31980878;31980878;31987166;31987239;31987239;31987239;31992378;31992378;31992378;31992378;31992378	31959491;31959491;31959491;31959491;31959491;31959900;31960871;31960871;31960871;31960871;31960871;31960871;31962544;31970356;31970246;31970356;31970356;31982979;31985957;31981060;31987322;31987322;31987322;31987322;31993103;31992969;31993107;31992941;31992834	+;+;+;+;+;+;+;+;+;+;+;+;+;+;+;+;+;+;+;+;+;+;+;+;+;+;+;+;+	6646	29	12	78	43	-1.61182	1.29508	20.2536	0.000238201	0.0191043
LINC01355	1;1;1	23281309;23284356;23285110	23286752;23284410;23285454	-;-;-	5444	15	13	55	28.5	-1.61353	0.79164	18.2522	0.000401546	0.0259443
UACA	15;15;15;15;15;15;15;15;15;15;15;15;15;15;15;15;15;15;15;15;15;15;15;15;15;15;15;15;15;15;15;15;15;15;15;15;15;15;15;15;15;15;15;15;15;15;15;15;15;15;15;15;15;15;15;15;15;15;15;15;15;15;15;15;15;15;15;15;15;15;15;15;15;15;15;15;15;15;15;15;15;15;15;15;15;15;15;15;15;15;15;15;15;15;15;15;15;15;15;15;15;15;15;15;15;15;15;15;15;15;15;15;15;15;15;15;15;15;15;15;15;15;15;15;15;15;15;15;15;15;15;15;15;…	70654554;70656802;70656932;70656934;70656935;70656977;70660151;70660151;70660151;70660151;70660151;70660151;70664662;70664662;70664662;70664662;70664662;70666724;70666724;70666724;70666724;70668918;70669094;70671039;70671039;70671039;70671039;70671039;70671039;70671878;70671878;70671965;70671965;70671965;70671965;70671971;70676307;70676493;70676493;70676493;70676493;70676493;70676493;70676493;706…	70657127;70657127;70657127;70657127;70657127;70657127;70661696;70660216;70660216;70660216;70660216;70660216;70664944;70664814;70664814;70664814;70664814;70669462;70669462;70669462;70669462;70669462;70669462;70671973;70671091;70671091;70671091;70671091;70671091;70672001;70672001;70672001;70672001;70672001;70672001;70672001;70676591;70676591;70676591;70676591;70676591;70676591;70676591;70676591;706…	-;-;-;-;-;-;-;-;-;-;-;-;-;-;-;-;-;-;-;-;-;-;-;-;-;-;-;-;-;-;-;-;-;-;-;-;-;-;-;-;-;-;-;-;-;-;-;-;-;-;-;-;-;-;-;-;-;-;-;-;-;-;-;-;-;-;-;-;-;-;-;-;-;-;-;-;-;-;-;-;-;-;-;-;-;-;-;-;-;-;-;-;-;-;-;-;-;-;-;-;-;-;-;-;-;-;-;-;-;-;-;-;-;-;-;-;-;-;-;-;-;-;-;-;-;-;-;-	11031	54	54	239	84	-1.61396	2.66843	23.1697	0.000116856	0.0119897
ANKRD36	2;2;2;2;2;2;2;2;2;2;2;2;2;2;2;2;2;2;2;2;2;2;2;2;2;2;2;2;2;2;2;2;2;2;2;2;2;2;2;2;2;2;2;2;2;2;2;2;2;2;2;2;2;2;2;2;2;2;2;2;2;2;2;2;2;2;2;2;2;2;2;2;2;2;2;2;2;2;2;2;2;2;2;2;2;2;2;2;2;2;2;2;2;2;2;2;2;2;2;2;2;2;2;2;2;2;2;2;2;2;2;2;2;2;2;2;2;2;2;2;2;2;2;2;2;2;2;2;2;2;2;2;2;2;2;2;2;2;2;2;2;2;2;2;2;2;2;2;2;2;2;2;2;2;2;2;2;2;2;2;2;2;2;2;2;2;2;2;2;2;2;2;2;2;2;2;2;2;2;2;2;2;2;2;2;2;2;2	97113496;97113496;97113552;97113657;97118064;97118064;97118064;97118064;97118344;97118344;97118344;97118344;97122887;97122887;97122887;97124460;97124460;97124460;97127067;97127067;97127067;97142640;97142640;97142640;97142763;97142763;97144518;97144518;97144640;97144640;97146486;97146486;97149295;97149295;97151879;97151879;97152504;97152504;97154675;97154675;97158107;97158107;97158588;97158588;971…	97113936;97113936;97113936;97113936;97118178;97118178;97118178;97118178;97118829;97118517;97118517;97118517;97122993;97122993;97122993;97124597;97124597;97124597;97127134;97127134;97127134;97142665;97142668;97142668;97142835;97142835;97144546;97144546;97144712;97144712;97146516;97146516;97149361;97149361;97151939;97151939;97152534;97152534;97154741;97154741;97158167;97158167;97158655;97158655;971…	+;+;+;+;+;+;+;+;+;+;+;+;+;+;+;+;+;+;+;+;+;+;+;+;+;+;+;+;+;+;+;+;+;+;+;+;+;+;+;+;+;+;+;+;+;+;+;+;+;+;+;+;+;+;+;+;+;+;+;+;+;+;+;+;+;+;+;+;+;+;+;+;+;+;+;+;+;+;+;+;+;+;+;+;+;+;+;+;+;+;+;+;+;+;+;+;+;+;+;+;+;+;+;+;+;+;+;+;+;+;+;+;+;+;+;+;+;+;+;+;+;+;+;+;+;+;+;+	9670	45.2	29.33	134.12	88.45	-1.62771	2.14426	36.3122	8.06e-06	0.00174028
RP11-1391J7.1	11;11	856880;859547	858691;859795	-;-	2061	8.1	19	42	42	-1.66235	0.798208	18.3345	0.000392785	0.0257123
BRCA2	13;13;13;13;13;13;13;13;13;13;13;13;13;13;13;13;13;13;13;13;13;13;13;13;13;13;13;13;13;13;13;13;13;13;13;13;13;13;13;13;13;13;13;13;13;13;13;13;13;13;13;13;13;13;13;13;13;13;13;13;13;13;13;13;13;13;13;13;13;13;13;13;13;13;13;13;13;13;13;13;13;13;13;13;13;13;13;13;13;13;13;13;13	32315474;32315480;32315505;32316422;32316422;32316422;32316461;32319077;32319077;32319077;32319077;32325076;32325076;32325076;32325076;32326101;32326101;32326101;32326101;32326242;32326242;32326242;32326242;32326499;32326499;32326499;32326499;32329443;32329443;32329443;32329443;32330919;32330919;32330919;32330919;32332272;32332272;32332272;32332272;32336265;32336265;32336265;32344558;32344558;323…	32315667;32315667;32315667;32316523;32316527;32316527;32316527;32319325;32319325;32319325;32319325;32325184;32325184;32325184;32325184;32326150;32326150;32326150;32326150;32326282;32326282;32326282;32326282;32326613;32326613;32326613;32326613;32329492;32329492;32329492;32329492;32331030;32331030;32331030;32331030;32333387;32333291;32333387;32333387;32341196;32341196;32341196;32344653;32344653;323…	+;+;+;+;+;+;+;+;+;+;+;+;+;+;+;+;+;+;+;+;+;+;+;+;+;+;+;+;+;+;+;+;+;+;+;+;+;+;+;+;+;+;+;+;+;+;+;+;+;+;+;+;+;+;+;+;+;+;+;+;+;+;+;+;+;+;+;+;+;+;+;+;+;+;+;+;+;+;+;+;+;+;+;+;+;+;+;+;+;+;+;+;+	12273	30	16	86	55	-1.66514	1.49642	27.6502	4.3e-05	0.00587403
CASC5	15;15;15;15;15;15;15;15;15;15;15;15;15;15;15;15;15;15;15;15;15;15;15;15;15;15;15;15;15;15;15;15;15;15;15;15;15;15;15;15;15;15;15;15;15;15;15;15;15;15;15;15;15;15;15;15;15;15;15;15;15;15;15;15;15;15;15;15;15;15;15;15;15;15;15;15;15;15;15;15;15;15;15;15;15;15;15;15;15;15;15;15;15;15;15;15;15;15;15;15;15;15;15;15;15;15;15;15;15;15;15;15;15;15;15;15;15;15;15;15;15;15;15;15;15;15;15;15;15;15;15;15	40594020;40594034;40594035;40594249;40594249;40594249;40594265;40594272;40602915;40602915;40602915;40602915;40602915;40602915;40602915;40605110;40605110;40605110;40605110;40605110;40605110;40606393;40606393;40606393;40606393;40606393;40606393;40606393;40608847;40608847;40608847;40608847;40608847;40608847;40608847;40610245;40610245;40610245;40610245;40610245;40610245;40610245;40610799;40611478;406…	40594392;40594392;40594392;40594392;40594392;40594392;40594392;40594392;40602966;40602966;40602966;40602966;40602966;40602966;40602966;40605149;40605149;40605149;40605149;40605149;40605149;40606432;40606452;40606452;40606452;40606452;40606452;40606452;40608908;40608908;40608908;40608908;40608908;40608908;40608908;40610297;40610297;40610297;40610297;40610289;40610297;40610297;40610876;40611511;406…	+;+;+;+;+;+;+;+;+;+;+;+;+;+;+;+;+;+;+;+;+;+;+;+;+;+;+;+;+;+;+;+;+;+;+;+;+;+;+;+;+;+;+;+;+;+;+;+;+;+;+;+;+;+;+;+;+;+;+;+;+;+;+;+;+;+;+;+;+;+;+;+;+;+;+;+;+;+;+;+;+;+;+;+;+;+;+;+;+;+;+;+;+;+;+;+;+;+;+;+;+;+;+;+;+;+;+;+;+;+;+;+;+;+;+;+;+;+;+;+;+;+;+;+;+;+;+;+	10250	146	82.5	411.5	285	-1.66692	3.75658	55.294	4.51e-07	0.000233058
EEA1	12;12;12;12;12;12;12;12;12;12;12;12;12;12;12;12;12;12;12;12;12;12;12;12;12;12;12;12;12;12;12;12;12;12;12;12;12;12;12;12;12;12;12;12;12;12;12;12;12;12;12;12;12;12;12;12;12;12;12;12	92770637;92776844;92777543;92777941;92779115;92780280;92781950;92787867;92798892;92801600;92802404;92802665;92809017;92809017;92811279;92811279;92812980;92812980;92813004;92816200;92816200;92816200;92819308;92819308;92819308;92821053;92826166;92826166;92827912;92827912;92832512;92832512;92842465;92842465;92851111;92851111;92852175;92852175;92852912;92852912;92853915;92853915;92857275;92857275;928…	92776133;92776942;92777663;92778179;92779300;92780411;92782135;92788049;92799086;92801701;92802734;92802734;92809156;92809156;92811434;92811434;92813093;92813093;92813093;92816400;92816400;92816400;92819511;92819511;92819511;92821099;92826285;92826285;92828061;92828061;92832850;92832850;92842581;92842581;92851266;92851266;92852296;92852296;92853025;92853025;92853954;92853954;92857340;92857340;928…	-;-;-;-;-;-;-;-;-;-;-;-;-;-;-;-;-;-;-;-;-;-;-;-;-;-;-;-;-;-;-;-;-;-;-;-;-;-;-;-;-;-;-;-;-;-;-;-;-;-;-;-;-;-;-;-;-;-;-;-	10150	128	79	427	209	-1.67076	3.62124	40.0749	4.23e-06	0.00102788
CSF3	17;17;17;17;17;17;17;17;17;17;17;17;17;17;17;17;17;17;17;17;17;17;17;17;17;17;17;17;17;17;17;17;17;17	40015361;40015361;40015435;40015444;40015446;40015447;40015447;40015467;40015487;40015691;40015691;40015691;40015691;40015691;40016233;40016233;40016233;40016233;40016233;40016485;40016485;40016485;40016485;40016485;40016485;40016485;40016795;40016795;40016795;40016795;40016795;40016795;40016795;40016795	40015514;40015514;40015514;40015514;40015514;40015845;40015845;40015514;40015845;40015854;40015854;40015845;40016162;40015845;40016340;40016631;40016340;40016340;40016340;40016631;40016631;40016631;40016631;40016631;40016631;40016631;40017057;40017648;40016943;40017813;40017813;40017758;40016917;40017813	+;+;+;+;+;+;+;+;+;+;+;+;+;+;+;+;+;+;+;+;+;+;+;+;+;+;+;+;+;+;+;+;+;+	2220	14	16	43	51	-1.68807	0.943485	25.0393	7.6e-05	0.00894335
AC159540.1	2;2;2;2;2;2;2;2;2;2;2;2;2;2;2;2;2;2;2;2;2;2;2;2;2;2;2;2;2;2;2;2;2;2;2;2;2;2;2;2;2;2;2;2;2;2;2;2;2;2;2;2;2;2;2;2;2;2;2;2;2;2;2;2;2	97416165;97416165;97416221;97416221;97416224;97416224;97422165;97422439;97422439;97422439;97422439;97422439;97422496;97422557;97422580;97422580;97422955;97422955;97422955;97422955;97422955;97422955;97422955;97422955;97422955;97422955;97422955;97422955;97422955;97423036;97423059;97423177;97423177;97423177;97423177;97423177;97423177;97423177;97423177;97423177;97423177;97423177;97423177;97423177;974…	97416405;97416405;97416405;97416405;97416405;97416405;97422659;97422656;97422497;97422659;97422497;97422656;97423084;97422659;97422659;97422659;97423084;97423084;97423084;97423084;97423084;97423084;97423084;97423084;97423084;97422988;97423084;97423084;97423084;97423084;97423084;97423261;97423272;97423272;97423272;97423261;97423272;97423256;97423272;97423388;97423272;97423272;97423261;97425470;974…	-;-;-;-;-;-;-;-;-;-;-;-;-;-;-;-;-;-;-;-;-;-;-;-;-;-;-;-;-;-;-;-;-;-;-;-;-;-;-;-;-;-;-;-;-;-;-;-;-;-;-;-;-;-;-;-;-;-;-;-;-;-;-;-;-	5278	35	31	128.5	78.83	-1.69292	2.02989	37.0394	7.09e-06	0.00155426
KIF14	1;1;1;1;1;1;1;1;1;1;1;1;1;1;1;1;1;1;1;1;1;1;1;1;1;1;1;1;1;1;1;1;1;1;1;1;1;1;1;1;1;1;1;1;1;1;1;1;1;1;1;1;1;1;1;1;1;1;1	200551497;200551500;200554468;200554468;200555380;200555380;200559330;200559330;200560722;200560722;200565069;200565069;200565445;200565445;200569911;200569911;200575591;200575591;200580254;200580254;200581201;200581201;200586101;200586101;200589217;200589217;200590125;200590125;200592080;200592080;200593667;200593667;200598237;200598237;200600050;200600050;200600356;200600356;200601896;200601896…	200553767;200553767;200554606;200554606;200555454;200555454;200559452;200559452;200560880;200560880;200565253;200565253;200565669;200565669;200570005;200570005;200575691;200575691;200580383;200580383;200581294;200581294;200586227;200586227;200589369;200589369;200590272;200590272;200592240;200592240;200593769;200593769;200598421;200598421;200600113;200600113;200600503;200600503;200602068;200602068…	-;-;-;-;-;-;-;-;-;-;-;-;-;-;-;-;-;-;-;-;-;-;-;-;-;-;-;-;-;-;-;-;-;-;-;-;-;-;-;-;-;-;-;-;-;-;-;-;-;-;-;-;-;-;-;-;-;-;-	7277	177.5	101	536.5	336	-1.70572	4.06882	55.8365	4.2e-07	0.000225154
CEP162	6;6;6;6;6;6;6;6;6;6;6;6;6;6;6;6;6;6;6;6;6;6;6;6;6;6;6;6;6;6;6;6;6;6;6;6;6;6;6;6;6;6;6;6;6;6;6;6;6;6;6;6;6;6;6;6;6;6;6;6;6;6;6;6;6;6;6;6;6;6;6;6;6;6;6;6;6;6;6;6;6;6;6;6;6;6;6;6;6;6;6;6;6;6;6;6;6;6;6;6;6;6;6;6;6;6;6;6;6;6;6;6;6;6;6;6;6;6;6;6;6;6;6;6;6	84124241;84124241;84124241;84124242;84124955;84126378;84126378;84126378;84126378;84126378;84146687;84146687;84146687;84146687;84146687;84149562;84149562;84149562;84149562;84149562;84152545;84152545;84152545;84152545;84152545;84155298;84155298;84155298;84155298;84155298;84160812;84160812;84160812;84160812;84161746;84161746;84161746;84161746;84163144;84163144;84163144;84163144;84169328;84169328;841…	84125276;84125276;84125276;84125276;84125276;84126512;84126512;84126512;84126512;84126512;84146785;84146785;84146785;84146785;84146785;84149703;84149703;84149703;84149703;84149703;84153179;84153179;84153179;84153179;84153179;84155594;84155510;84155510;84155510;84155510;84160916;84160916;84160916;84160916;84161909;84161909;84161909;84161909;84163270;84163270;84163270;84163270;84169433;84169433;841…	-;-;-;-;-;-;-;-;-;-;-;-;-;-;-;-;-;-;-;-;-;-;-;-;-;-;-;-;-;-;-;-;-;-;-;-;-;-;-;-;-;-;-;-;-;-;-;-;-;-;-;-;-;-;-;-;-;-;-;-;-;-;-;-;-;-;-;-;-;-;-;-;-;-;-;-;-;-;-;-;-;-;-;-;-;-;-;-;-;-;-;-;-;-;-;-;-;-;-;-;-;-;-;-;-;-;-;-;-;-;-;-;-;-;-;-;-;-;-;-;-;-;-;-;-	5474	36	24	122	68	-1.70872	1.90149	32.4081	1.65e-05	0.00309232
CCDC186	10;10;10;10;10;10;10;10;10;10;10;10;10;10;10;10;10;10;10;10;10;10;10;10;10;10;10;10;10;10;10;10;10;10;10;10	114120862;114124929;114125886;114127461;114127461;114129891;114129891;114130199;114131026;114131147;114131147;114131147;114131929;114131929;114131929;114134913;114134913;114135891;114135891;114136148;114136148;114137186;114137186;114144497;114144497;114145549;114151092;114157554;114161608;114161608;114162637;114173141;114174015;114174015;114174015;114174105	114125226;114125226;114126105;114127671;114127671;114129971;114129971;114130669;114131336;114131336;114131336;114131336;114132094;114132184;114132184;114135055;114135055;114135977;114135977;114136246;114136246;114137290;114137290;114144602;114144616;114145761;114151220;114157680;114163329;114163329;114163329;114173265;114174220;114174202;114174220;114174179	-;-;-;-;-;-;-;-;-;-;-;-;-;-;-;-;-;-;-;-;-;-;-;-;-;-;-;-;-;-;-;-;-;-;-;-	8991	25	16	82	50	-1.73166	1.39036	29.0525	3.21e-05	0.00487677
RIF1	2;2;2;2;2;2;2;2;2;2;2;2;2;2;2;2;2;2;2;2;2;2;2;2;2;2;2;2;2;2;2;2;2;2;2;2;2;2;2;2;2;2;2;2;2;2;2;2;2;2;2;2;2;2;2;2;2;2;2;2;2;2;2;2;2;2;2;2;2;2;2;2;2;2;2;2;2;2;2;2;2;2;2;2;2;2;2;2;2;2;2;2;2;2;2;2;2;2;2;2;2;2;2;2;2;2;2;2;2;2;2;2;2;2;2;2;2;2;2;2;2;2;2;2;2;2;2;2;2;2;2;2;2;2;2;2;2;2;2;2;2;2;2;2;2;2;2;2;2;2;2;2;2;2;2;2;2;2;2;2;2;2;2;2;2;2;2;2;2;2;2;2;2;2;2;2;2;2;2;2;2;2;2;2;2;2;2;2;2;2;2;2;2;2;2;2;2;2;2;2…	151409883;151409883;151409886;151409900;151409941;151409956;151410090;151410414;151410414;151410414;151410414;151411260;151411260;151411260;151411260;151411260;151411260;151411260;151414823;151414823;151414823;151414823;151414823;151414823;151414823;151416561;151416561;151416561;151416561;151416561;151416561;151416561;151416807;151416807;151416807;151416807;151416807;151416807;151416807;151420190…	151410033;151410033;151409939;151409939;151410527;151410033;151410527;151410527;151410527;151410527;151410527;151411338;151411338;151411338;151411338;151411338;151411338;151411338;151414919;151414919;151414919;151414919;151414919;151414919;151414919;151416688;151416688;151416688;151416688;151416688;151416688;151416688;151416901;151416901;151416901;151416901;151416901;151416901;151416901;151420379…	+;+;+;+;+;+;+;+;+;+;+;+;+;+;+;+;+;+;+;+;+;+;+;+;+;+;+;+;+;+;+;+;+;+;+;+;+;+;+;+;+;+;+;+;+;+;+;+;+;+;+;+;+;+;+;+;+;+;+;+;+;+;+;+;+;+;+;+;+;+;+;+;+;+;+;+;+;+;+;+;+;+;+;+;+;+;+;+;+;+;+;+;+;+;+;+;+;+;+;+;+;+;+;+;+;+;+;+;+;+;+;+;+;+;+;+;+;+;+;+;+;+;+;+;+;+;+;+	18166	147	98	498	297	-1.74999	3.92511	59.803	2.54e-07	0.000153198
TRIP11	14;14;14;14;14;14;14;14;14;14;14;14;14;14;14;14;14;14;14;14;14;14;14;14;14;14;14;14;14;14;14;14;14;14;14;14;14;14;14;14;14;14;14;14;14;14;14;14;14;14;14;14	91965991;91969513;91972717;91972717;91974627;91974627;91975172;91975172;91975172;91976108;91976108;91976108;91977126;91988284;91988284;91988284;91993809;91993809;91993809;91995352;91995352;91995352;91999240;91999240;91999240;91999968;91999968;92003419;92003419;92007640;92007640;92010986;92011755;92011755;92014215;92014215;92015696;92015696;92015833;92017682;92017682;92021556;92021556;92025310;920…	91969893;91969893;91972861;91972861;91974743;91974743;91975286;91975286;91975286;91976189;91976189;91976189;91977248;91988383;91988383;91988383;91993912;91993912;91993912;91995515;91995515;91995515;91999379;91999433;91999433;92000108;92000108;92006448;92006448;92007852;92007852;92011072;92011795;92011795;92014577;92014577;92015751;92015861;92015861;92017750;92017750;92021831;92021831;92025420;920…	-;-;-;-;-;-;-;-;-;-;-;-;-;-;-;-;-;-;-;-;-;-;-;-;-;-;-;-;-;-;-;-;-;-;-;-;-;-;-;-;-;-;-;-;-;-;-;-;-;-;-;-	10372	112	70.5	399.5	194.5	-1.75269	3.50455	42.9894	2.64e-06	0.000817067
MTRNR2L12	3	96617188	96618236	-	1049	37	37	153.83	90	-1.75878	2.24296	40.4061	4e-06	0.00102788
TPR	1;1;1;1;1;1;1;1;1;1;1;1;1;1;1;1;1;1;1;1;1;1;1;1;1;1;1;1;1;1;1;1;1;1;1;1;1;1;1;1;1;1;1;1;1;1;1;1;1;1;1;1;1;1;1;1;1;1;1;1;1;1;1;1;1;1;1;1;1;1;1;1;1;1;1;1;1;1;1;1;1;1;1;1;1;1;1;1;1;1;1;1;1;1;1;1;1;1;1;1;1;1;1;1;1;1;1;1;1;1;1	186311652;186314629;186317482;186318447;186318505;186318733;186318733;186320312;186320312;186322318;186322318;186322518;186322518;186323686;186325519;186325764;186326104;186326104;186327460;186331498;186332195;186333122;186334325;186335068;186335338;186336496;186337013;186338033;186338187;186339642;186339642;186341028;186341028;186341252;186341252;186343326;186343906;186343906;186344375;186345580…	186314026;186314724;186317600;186318603;186318603;186318828;186318828;186320418;186320418;186322412;186322412;186322701;186322586;186323870;186325854;186325854;186326220;186326235;186327660;186331581;186332343;186333394;186334533;186335129;186335543;186336694;186337156;186338243;186338243;186339772;186339772;186341159;186341159;186343473;186341389;186343473;186344090;186344090;186344578;186345696…	-;-;-;-;-;-;-;-;-;-;-;-;-;-;-;-;-;-;-;-;-;-;-;-;-;-;-;-;-;-;-;-;-;-;-;-;-;-;-;-;-;-;-;-;-;-;-;-;-;-;-;-;-;-;-;-;-;-;-;-;-;-;-;-;-;-;-;-;-;-;-;-;-;-;-;-;-;-;-;-;-;-;-;-;-;-;-;-;-;-;-;-;-;-;-;-;-;-;-;-;-;-;-;-;-;-;-;-;-;-;-	12350	612	456.5	2186	1328.5	-1.76776	6.05813	93.0736	8.32e-09	1.34e-05
KIAA1109	4;4;4;4;4;4;4;4;4;4;4;4;4;4;4;4;4;4;4;4;4;4;4;4;4;4;4;4;4;4;4;4;4;4;4;4;4;4;4;4;4;4;4;4;4;4;4;4;4;4;4;4;4;4;4;4;4;4;4;4;4;4;4;4;4;4;4;4;4;4;4;4;4;4;4;4;4;4;4;4;4;4;4;4;4;4;4;4;4;4;4;4;4;4;4;4;4;4;4;4;4;4;4;4;4;4;4;4;4;4;4;4;4;4;4;4;4;4;4;4;4;4;4;4;4;4;4;4;4;4;4;4;4;4;4;4;4;4;4;4;4;4;4;4;4;4;4;4;4;4;4;4;4;4;4;4;4;4;4;4;4;4;4;4;4;4;4;4;4;4;4;4;4;4;4;4;4;4;4;4;4;4;4;4;4;4;4;4;4;4;4;4;4;4;4;4;4;4;4;4…	122152333;122154025;122170603;122170615;122173036;122173036;122174574;122174574;122175850;122175850;122186036;122186036;122186181;122187431;122187431;122187431;122187895;122187895;122187895;122190000;122190000;122190000;122192229;122192229;122192229;122196635;122196635;122196635;122196749;122197196;122197196;122197196;122197196;122199359;122199359;122199359;122199359;122201009;122201009;122201009…	122152584;122154112;122170744;122170744;122173152;122173152;122174652;122174652;122175914;122175914;122186222;122186222;122186222;122187512;122187512;122187512;122188088;122188088;122188088;122190079;122190079;122190079;122192379;122192379;122192379;122196791;122196791;122196791;122196791;122197274;122197274;122197274;122197274;122199450;122199450;122199450;122199450;122201126;122201126;122201126…	+;+;+;+;+;+;+;+;+;+;+;+;+;+;+;+;+;+;+;+;+;+;+;+;+;+;+;+;+;+;+;+;+;+;+;+;+;+;+;+;+;+;+;+;+;+;+;+;+;+;+;+;+;+;+;+;+;+;+;+;+;+;+;+;+;+;+;+;+;+;+;+;+;+;+;+;+;+;+;+;+;+;+;+;+;+;+;+;+;+;+;+;+;+;+;+;+;+;+;+;+;+;+;+;+;+;+;+;+;+;+;+;+;+;+;+;+;+;+;+;+;+;+;+;+;+;+;+	20470	55.5	42	205	121	-1.78681	2.64597	47.5731	1.32e-06	0.0005142
RP11-734K23.9	2;2;2;2;2;2;2;2;2;2;2;2;2;2;2;2;2;2;2;2;2;2	97281904;97282492;97283902;97283981;97284044;97284433;97284690;97284701;97284701;97284878;97284878;97284878;97284974;97285303;97285303;97285465;97291540;97291540;97291540;97291540;97291540;97291540	97282084;97284785;97284164;97284164;97284160;97284785;97284785;97284785;97284785;97285007;97285007;97285007;97285007;97285382;97285523;97285523;97291780;97291632;97291721;97291724;97291721;97291780	+;+;+;+;+;+;+;+;+;+;+;+;+;+;+;+;+;+;+;+;+;+	3067	19.5	14.5	71.83	43	-1.79681	1.18473	28.6571	3.49e-05	0.00514684
RP1-68D18.2	11;11	35212550;35213604	35212849;35214007	+;+	704	10	5	27	24	-1.80241	0.100025	17.077	0.000553481	0.0319742
CCDC88A	2;2;2;2;2;2;2;2;2;2;2;2;2;2;2;2;2;2;2;2;2;2;2;2;2;2;2;2;2;2;2;2;2;2;2;2;2;2;2;2;2;2;2;2;2;2;2;2;2;2;2;2;2;2;2;2;2;2;2;2;2;2;2;2;2;2;2;2;2;2;2;2;2;2;2;2;2;2;2;2;2;2;2;2;2;2;2;2;2;2;2;2;2;2;2;2;2;2;2;2;2;2;2;2;2;2;2;2;2;2;2;2;2;2;2;2;2;2;2;2;2;2;2;2;2;2;2;2;2;2;2;2;2;2;2;2;2;2;2;2;2;2;2;2;2;2;2;2;2;2;2;2;2;2;2;2;2;2;2;2;2;2;2;2;2;2;2;2;2;2;2;2;2;2;2;2;2;2;2;2;2;2;2;2;2;2;2;2;2;2;2;2;2;2;2;2;2;2;2;2…	55287842;55287842;55287847;55287847;55288088;55288178;55291676;55291676;55291676;55291676;55291676;55291676;55294173;55295597;55295597;55295597;55295597;55295597;55295597;55295797;55295950;55296258;55296258;55296258;55296258;55296258;55296258;55296258;55296258;55299839;55299839;55299839;55299839;55299839;55299839;55299839;55301206;55301206;55301206;55301206;55301206;55301206;55301206;55301206;553…	55291164;55291164;55291164;55291164;55291164;55288355;55291775;55291775;55291775;55291775;55291775;55291775;55296056;55296056;55296056;55296056;55295727;55296056;55296056;55296056;55296056;55296523;55296523;55296523;55296523;55296523;55296523;55296523;55296523;55299919;55299919;55299919;55299919;55299919;55299919;55299919;55301277;55301277;55301277;55301277;55301277;55301277;55301277;55301277;553…	-;-;-;-;-;-;-;-;-;-;-;-;-;-;-;-;-;-;-;-;-;-;-;-;-;-;-;-;-;-;-;-;-;-;-;-;-;-;-;-;-;-;-;-;-;-;-;-;-;-;-;-;-;-;-;-;-;-;-;-;-;-;-;-;-;-;-;-;-;-;-;-;-;-;-;-;-;-;-;-;-;-;-;-;-;-;-;-;-;-;-;-;-;-;-;-;-;-;-;-;-;-;-;-;-;-;-;-;-;-;-;-;-;-;-;-;-;-;-;-;-;-;-;-;-;-;-;-	14537	115	94	486	226.5	-1.81103	3.75197	47.9399	1.25e-06	0.000500879
PHIP	6;6;6;6;6;6;6;6;6;6;6;6;6;6;6;6;6;6;6;6;6;6;6;6;6;6;6;6;6;6;6;6;6;6;6;6;6;6;6;6;6;6;6;6;6;6;6;6;6;6;6;6;6;6;6;6;6	78935867;78940546;78945300;78945300;78946001;78946001;78946711;78946711;78947623;78947623;78954814;78954814;78955232;78955232;78955613;78955613;78958475;78961690;78961690;78963097;78963097;78965703;78965703;78965945;78965945;78969835;78969835;78970049;78970049;78970781;78970781;78978592;78978592;78982886;78982886;78985352;78988209;78990868;78997414;78998254;79001899;79003730;79015082;79015630;790…	78941330;78941330;78945497;78945497;78946260;78946260;78946874;78946874;78947775;78947775;78954963;78954963;78955282;78955282;78958600;78955682;78958600;78961810;78961810;78963252;78963252;78965764;78965764;78966056;78966056;78969917;78969917;78970173;78970173;78970888;78970888;78978711;78978711;78982943;78983117;78985428;78988349;78990985;78997597;78998391;79002124;79003858;79015216;79015783;790…	-;-;-;-;-;-;-;-;-;-;-;-;-;-;-;-;-;-;-;-;-;-;-;-;-;-;-;-;-;-;-;-;-;-;-;-;-;-;-;-;-;-;-;-;-;-;-;-;-;-;-;-;-;-;-;-;-	13252	127.5	68	422.5	244	-1.82676	3.65436	52.4549	6.59e-07	0.000298107
BCYRN1	2	47335315	47335514	+	200	1407.07	1127.7	4646.13	4426.61	-1.89377	7.40454	216.246	6.41e-12	4.64e-08
snoU2_19	11;4;7;X	93721542;110433109;63175940;20136306	93721621;110433188;63176019;20136385	+;-;-;-	320	8.5	6	34.5	18.5	-1.90019	0.128333	17.2781	0.000523486	0.031038
AC012358.8	2;2;2;2;2;2;2;2;2;2;2;2;2;2;2;2;2;2;2;2;2;2;2;2;2;2;2;2;2;2;2;2;2;2;2;2;2;2;2;2;2;2;2;2;2;2;2;2;2;2;2;2;2;2;2;2;2;2;2;2;2;2;2;2;2;2;2;2;2;2;2;2;2;2;2;2;2;2;2;2;2;2	55282350;55306097;55308492;55308832;55308832;55313988;55313988;55313988;55314082;55314160;55314161;55314162;55314162;55314162;55314162;55314162;55314162;55314162;55314190;55314190;55314190;55314190;55314190;55314190;55314190;55314190;55314190;55314190;55314193;55314193;55314194;55314426;55315025;55315263;55316879;55317745;55320829;55320829;55320829;55320829;55320829;55320829;55329422;55329422;553…	55282434;55306228;55308927;55308927;55308927;55314661;55314446;55314446;55314251;55314251;55314251;55314251;55314251;55314251;55314251;55314251;55314251;55314251;55314251;55314251;55314251;55314251;55314251;55314251;55314251;55314251;55314251;55314251;55314251;55314251;55314251;55314551;55315525;55315455;55317212;55317809;55320928;55320928;55320928;55320928;55321131;55320928;55329519;55329713;553…	+;+;+;+;+;+;+;+;+;+;+;+;+;+;+;+;+;+;+;+;+;+;+;+;+;+;+;+;+;+;+;+;+;+;+;+;+;+;+;+;+;+;+;+;+;+;+;+;+;+;+;+;+;+;+;+;+;+;+;+;+;+;+;+;+;+;+;+;+;+;+;+;+;+;+;+;+;+;+;+;+;+	4741	11	5	34	25	-1.9197	0.264809	20.0466	0.00025108	0.0197479
GCC2	2;2;2;2;2;2;2;2;2;2;2;2;2;2;2;2;2;2;2;2;2;2;2;2;2;2;2;2;2;2;2;2;2;2;2;2;2;2;2;2;2;2;2;2;2;2;2;2;2;2;2;2;2;2;2;2;2;2;2;2;2;2;2;2;2;2;2;2;2;2;2;2;2;2;2;2;2;2;2;2;2;2;2;2;2;2;2;2;2;2;2	108448561;108449191;108449223;108449231;108449240;108449633;108449633;108449633;108449633;108449633;108449884;108451028;108451028;108451028;108452399;108452399;108452399;108452399;108452399;108462588;108468980;108468980;108468980;108468980;108468980;108469300;108469300;108469651;108469651;108469651;108469651;108469651;108471814;108471845;108472827;108472827;108472827;108472827;108472827;108474789…	108449280;108449280;108449280;108449289;108449280;108449689;108449689;108450019;108449689;108449689;108449994;108451112;108451112;108451112;108452466;108452466;108452466;108452466;108452466;108462685;108469084;108469084;108469084;108469084;108469084;108469332;108469456;108472116;108470227;108470062;108472116;108472116;108472116;108472116;108472899;108473328;108472899;108472899;108472899;108475394…	+;+;+;+;+;+;+;+;+;+;+;+;+;+;+;+;+;+;+;+;+;+;+;+;+;+;+;+;+;+;+;+;+;+;+;+;+;+;+;+;+;+;+;+;+;+;+;+;+;+;+;+;+;+;+;+;+;+;+;+;+;+;+;+;+;+;+;+;+;+;+;+;+;+;+;+;+;+;+;+;+;+;+;+;+;+;+;+;+;+;+	13282	41	24.33	166.5	76	-1.93797	2.19183	35.7664	8.88e-06	0.00181
MUC6	11;11;11;11;11;11;11;11;11;11;11;11;11;11;11;11;11;11;11;11;11;11;11;11;11;11;11;11;11;11;11;11;11;11;11;11;11;11;11;11;11	1012821;1013473;1013796;1013899;1015762;1015762;1019275;1019905;1020090;1020684;1020684;1021215;1023509;1023947;1024844;1025182;1025805;1026000;1026327;1026941;1027141;1027268;1027685;1027965;1028226;1028646;1028889;1029046;1029228;1029495;1030213;1030573;1030947;1031169;1031607;1031619;1031813;1031813;1033013;1033013;1036604	1013633;1013633;1013898;1014001;1016153;1018770;1019496;1020257;1020257;1020734;1020734;1021277;1023652;1024103;1025083;1025367;1025915;1026141;1026478;1027050;1027193;1027517;1027817;1028059;1028387;1028783;1028961;1029150;1029366;1029615;1030335;1030780;1031056;1031259;1031733;1031733;1032053;1032053;1033209;1033075;1036706	-;-;-;-;-;-;-;-;-;-;-;-;-;-;-;-;-;-;-;-;-;-;-;-;-;-;-;-;-;-;-;-;-;-;-;-;-;-;-;-;-	8428	11.5	8	56.58	18.83	-1.98276	0.573119	17.5405	0.000487026	0.0294804
ATRX	X;X;X;X;X;X;X;X;X;X;X;X;X;X;X;X;X;X;X;X;X;X;X;X;X;X;X;X;X;X;X;X;X;X;X;X;X;X;X;X;X;X;X;X;X;X;X;X;X;X;X;X;X;X;X;X;X;X;X;X;X;X;X;X;X;X;X;X;X;X;X;X;X;X;X;X;X;X;X;X;X;X;X;X;X;X;X;X;X;X;X;X;X;X;X;X;X;X;X;X;X;X;X;X;X;X;X;X;X;X;X;X;X;X;X;X;X;X;X;X;X;X;X;X;X;X;X;X;X;X;X;X;X;X;X;X;X;X;X;X;X;X;X;X;X;X;X;X;X;X;X;X;X;X;X;X;X;X;X;X;X;X;X;X;X;X;X;X;X;X;X;X;X;X;X;X;X;X;X;X;X;X;X;X;X;X;X;X;X;X;X;X;X;X;X;X;X;X;X;X…	77504878;77505713;77505713;77506905;77508481;77520788;77520788;77520788;77520788;77520788;77521036;77521403;77521403;77521403;77521403;77521403;77522263;77522263;77522263;77522263;77523252;77523252;77523252;77523252;77557451;77557451;77557451;77557451;77558669;77558669;77558669;77558669;77558809;77561647;77574250;77574250;77574250;77574250;77574257;77574311;77575554;77575693;77589834;77589834;775…	77508629;77508629;77508629;77508629;77508629;77520916;77522388;77520916;77520916;77520916;77521102;77521421;77521498;77521498;77521498;77521498;77522468;77522388;77522388;77522388;77523401;77523401;77523401;77523401;77557645;77557645;77557645;77557645;77558846;77558846;77558846;77558846;77558846;77561708;77574358;77574358;77574358;77574358;77574358;77574358;77575605;77575753;77589872;77589940;775…	-;-;-;-;-;-;-;-;-;-;-;-;-;-;-;-;-;-;-;-;-;-;-;-;-;-;-;-;-;-;-;-;-;-;-;-;-;-;-;-;-;-;-;-;-;-;-;-;-;-;-;-;-;-;-;-;-;-;-;-;-;-;-;-;-;-;-;-;-;-;-;-;-;-;-;-;-;-;-;-;-;-;-;-;-;-;-;-;-;-;-;-;-;-;-;-;-;-;-;-;-;-;-;-;-;-;-;-;-;-;-;-;-;-;-;-;-;-;-;-;-;-;-;-;-;-;-;-	19302	87	99	453.5	282	-2.01806	3.75928	77.5514	3.53e-08	3.14e-05
ZNF292	6;6;6;6;6;6;6;6;6;6;6;6;6;6;6;6;6;6;6;6;6;6;6;6;6;6;6;6;6;6;6;6;6;6;6;6;6;6;6;6;6;6;6;6;6;6	87152833;87155191;87155549;87155563;87155565;87155576;87155581;87155621;87169674;87213714;87213738;87214998;87215903;87215903;87215903;87215903;87215903;87215903;87216299;87216299;87216299;87216299;87216299;87218596;87218596;87218596;87218596;87218596;87222770;87222770;87222770;87233325;87233340;87233524;87243475;87243475;87243475;87243475;87245503;87245503;87245503;87249312;87254650;87254650;872…	87152869;87155361;87155759;87155759;87155759;87155759;87155759;87155759;87170364;87213865;87213865;87215142;87216057;87215962;87216057;87216057;87216057;87216057;87216377;87216377;87216377;87216377;87216377;87218731;87218731;87218731;87218731;87218731;87222904;87222867;87223936;87233527;87233527;87233527;87243611;87243611;87243567;87243611;87245644;87245644;87245644;87249466;87255049;87261920;872…	+;+;+;+;+;+;+;+;+;+;+;+;+;+;+;+;+;+;+;+;+;+;+;+;+;+;+;+;+;+;+;+;+;+;+;+;+;+;+;+;+;+;+;+;+;+	13128	69	25	232	135	-2.02543	2.76129	42.9552	2.65e-06	0.000817067
SYNE2	14;14;14;14;14;14;14;14;14;14;14;14;14;14;14;14;14;14;14;14;14;14;14;14;14;14;14;14;14;14;14;14;14;14;14;14;14;14;14;14;14;14;14;14;14;14;14;14;14;14;14;14;14;14;14;14;14;14;14;14;14;14;14;14;14;14;14;14;14;14;14;14;14;14;14;14;14;14;14;14;14;14;14;14;14;14;14;14;14;14;14;14;14;14;14;14;14;14;14;14;14;14;14;14;14;14;14;14;14;14;14;14;14;14;14;14;14;14;14;14;14;14;14;14;14;14;14;14;14;14;14;14;14;…	63852983;63852983;63852983;63852992;63864388;63873417;63909098;63909098;63909098;63909098;63909098;63940614;63940614;63940614;63940614;63940614;63941695;63941695;63941695;63941695;63941695;63941885;63941885;63941885;63941885;63941885;63942051;63942051;63942051;63942051;63942051;63949825;63949825;63949825;63949825;63949825;63954719;63954719;63954719;63954719;63954719;63960736;63961525;63961525;639…	63853143;63853143;63853143;63853143;63864469;63874006;63909227;63909227;63909227;63909227;63909227;63940675;63940675;63940675;63940675;63940675;63941790;63941790;63941790;63941790;63941790;63941962;63941962;63941962;63941962;63941962;63942143;63942143;63942143;63942143;63942143;63950006;63950006;63950006;63950006;63950006;63954915;63954915;63954915;63954915;63954915;63960877;63961625;63961625;639…	+;+;+;+;+;+;+;+;+;+;+;+;+;+;+;+;+;+;+;+;+;+;+;+;+;+;+;+;+;+;+;+;+;+;+;+;+;+;+;+;+;+;+;+;+;+;+;+;+;+;+;+;+;+;+;+;+;+;+;+;+;+;+;+;+;+;+;+;+;+;+;+;+;+;+;+;+;+;+;+;+;+;+;+;+;+;+;+;+;+;+;+;+;+;+;+;+;+;+;+;+;+;+;+;+;+;+;+;+;+;+;+;+;+;+;+;+;+;+;+;+;+;+;+;+;+;+;+	31374	136	122	620.5	421	-2.05653	4.25065	104.779	3.18e-09	6.56e-06
GOLGB1	3;3;3;3;3;3;3;3;3;3;3;3;3;3;3;3;3;3;3;3;3;3;3;3;3;3;3;3;3;3;3;3;3;3;3;3;3;3;3;3;3;3;3;3;3;3;3;3;3;3;3;3;3;3;3;3;3;3;3;3;3;3;3;3;3;3;3;3;3;3;3;3;3;3;3;3;3;3;3;3;3;3;3;3;3;3;3;3;3;3;3;3;3;3;3;3;3;3;3;3;3;3;3;3;3;3;3;3;3;3;3;3;3;3;3;3;3;3;3;3	121663199;121663203;121663203;121664101;121664530;121664926;121664926;121664926;121664926;121664926;121667476;121667476;121667476;121667476;121667476;121668061;121668061;121668061;121668061;121668061;121668314;121669197;121669212;121669212;121669212;121669212;121676893;121676893;121676893;121676893;121676893;121677285;121677285;121677285;121677285;121681687;121681687;121681687;121681687;121690670…	121664614;121664614;121664614;121664614;121664614;121665031;121665031;121665031;121665031;121665031;121667610;121667610;121667610;121667610;121667610;121668158;121668158;121668158;121668158;121668158;121668508;121669355;121669355;121669355;121669355;121669355;121677030;121677030;121677030;121677030;121677030;121677450;121677450;121677450;121677450;121681865;121681865;121681865;121681865;121692581…	-;-;-;-;-;-;-;-;-;-;-;-;-;-;-;-;-;-;-;-;-;-;-;-;-;-;-;-;-;-;-;-;-;-;-;-;-;-;-;-;-;-;-;-;-;-;-;-;-;-;-;-;-;-;-;-;-;-;-;-;-;-;-;-;-;-;-;-;-;-;-;-;-;-;-;-;-;-;-;-;-;-;-;-;-;-;-;-;-;-;-;-;-;-;-;-;-;-;-;-;-;-;-;-;-;-;-;-;-;-;-;-;-;-;-;-;-;-;-;-	11865	156	161	825.67	465.5	-2.0618	4.55575	85.9969	1.56e-08	1.89e-05
VPS13A	9;9;9;9;9;9;9;9;9;9;9;9;9;9;9;9;9;9;9;9;9;9;9;9;9;9;9;9;9;9;9;9;9;9;9;9;9;9;9;9;9;9;9;9;9;9;9;9;9;9;9;9;9;9;9;9;9;9;9;9;9;9;9;9;9;9;9;9;9;9;9;9;9;9;9;9;9;9;9;9;9;9;9;9;9;9;9;9;9;9;9;9;9;9;9;9;9;9;9;9;9;9;9;9;9;9;9;9;9;9;9;9;9;9;9;9;9;9;9;9;9;9;9;9;9;9;9;9;9;9;9;9;9;9;9;9;9;9;9;9;9;9;9;9;9;9;9;9;9;9;9;9;9;9;9;9;9;9;9;9;9;9;9;9;9;9;9;9;9;9;9;9;9;9;9;9;9;9;9;9;9;9;9;9;9;9;9;9;9;9;9;9;9;9;9;9;9;9;9;9…	77177353;77177445;77177445;77177534;77199945;77199945;77199945;77199945;77201365;77201365;77201365;77201365;77205313;77205313;77205313;77205313;77205978;77205978;77205978;77205978;77209423;77209423;77209423;77209423;77209488;77210616;77210616;77210616;77210616;77210616;77211213;77212969;77212969;77212969;77212969;77213234;77213234;77213234;77213234;77214329;77214329;77214329;77214329;77219954;772…	77177804;77177804;77177804;77177804;77199988;77199988;77199988;77199988;77201407;77201407;77201407;77201407;77205408;77205408;77205408;77205408;77206079;77206079;77206079;77206079;77209532;77209532;77209532;77209532;77209532;77210675;77210675;77210675;77210675;77210675;77211617;77213028;77213028;77213028;77213028;77213314;77213314;77213314;77213314;77214386;77214386;77214386;77214386;77220081;772…	+;+;+;+;+;+;+;+;+;+;+;+;+;+;+;+;+;+;+;+;+;+;+;+;+;+;+;+;+;+;+;+;+;+;+;+;+;+;+;+;+;+;+;+;+;+;+;+;+;+;+;+;+;+;+;+;+;+;+;+;+;+;+;+;+;+;+;+;+;+;+;+;+;+;+;+;+;+;+;+;+;+;+;+;+;+;+;+;+;+;+;+;+;+;+;+;+;+;+;+;+;+;+;+;+;+;+;+;+;+;+;+;+;+;+;+;+;+;+;+;+;+;+;+;+;+;+;+	20196	113	57	401	288	-2.0795	3.65317	77.124	3.69e-08	3.14e-05
KIF20B	10;10;10;10;10;10;10;10;10;10;10;10;10;10;10;10;10;10;10;10;10;10;10;10;10;10;10;10;10;10;10;10;10;10;10;10;10;10;10;10;10;10;10;10;10;10;10;10;10;10;10;10;10;10;10;10;10;10;10;10;10;10;10;10;10;10;10;10;10;10;10;10;10;10;10;10;10;10;10;10;10;10;10;10;10;10;10;10;10;10;10;10	89701610;89701617;89701679;89705294;89705294;89705294;89709167;89709167;89709167;89709345;89709345;89709345;89709927;89709927;89709927;89710961;89710961;89710961;89714047;89714047;89714955;89714955;89716436;89716436;89717424;89717424;89717576;89717576;89718710;89718710;89719419;89719419;89723576;89723964;89723964;89725020;89725020;89725020;89726293;89726413;89726413;89727856;89727856;89727856;897…	89701680;89701680;89701717;89705441;89705441;89705441;89709253;89709253;89709253;89709461;89709461;89709461;89710065;89710065;89710065;89711090;89711145;89711145;89714083;89714083;89715182;89715182;89716547;89716547;89717495;89717495;89717722;89717722;89718872;89718872;89719706;89719706;89724103;89724103;89724103;89725158;89725158;89725158;89726521;89726521;89726521;89727896;89727896;89727896;897…	+;+;+;+;+;+;+;+;+;+;+;+;+;+;+;+;+;+;+;+;+;+;+;+;+;+;+;+;+;+;+;+;+;+;+;+;+;+;+;+;+;+;+;+;+;+;+;+;+;+;+;+;+;+;+;+;+;+;+;+;+;+;+;+;+;+;+;+;+;+;+;+;+;+;+;+;+;+;+;+;+;+;+;+;+;+;+;+;+;+;+;+	6851	171.5	122.5	799.5	406.5	-2.08376	4.45109	74.8477	4.65e-08	3.56e-05
RP11-301G19.1	6;6	67887646;67888911	67888821;67889339	-;-	1605	12	6	42	33	-2.09714	0.549952	28.1695	3.86e-05	0.0054728
DST	6;6;6;6;6;6;6;6;6;6;6;6;6;6;6;6;6;6;6;6;6;6;6;6;6;6;6;6;6;6;6;6;6;6;6;6;6;6;6;6;6;6;6;6;6;6;6;6;6;6;6;6;6;6;6;6;6;6;6;6;6;6;6;6;6;6;6;6;6;6;6;6;6;6;6;6;6;6;6;6;6;6;6;6;6;6;6;6;6;6;6;6;6;6;6;6;6;6;6;6;6;6;6;6;6;6;6;6;6;6;6;6;6;6;6;6;6;6;6;6;6;6;6;6;6;6;6;6;6;6;6;6;6;6;6;6;6;6;6;6;6;6;6;6;6;6;6;6;6;6;6;6;6;6;6;6;6;6;6;6;6;6;6;6;6;6;6;6;6;6;6;6;6;6;6;6;6;6;6;6;6;6;6;6;6;6;6;6;6;6;6;6;6;6;6;6;6;6;6;6…	56457987;56457989;56457989;56457996;56458060;56458239;56458239;56458245;56458968;56459264;56460131;56460131;56460131;56460131;56460131;56460131;56460131;56460131;56460131;56460131;56463046;56463046;56463046;56463046;56463046;56463046;56463565;56463565;56463565;56463565;56463565;56463565;56463565;56463565;56463565;56464351;56464685;56464685;56466078;56466078;56466078;56466078;56466078;56466078;564…	56459267;56459267;56459267;56459267;56459267;56459267;56459267;56459267;56459267;56459267;56460254;56460254;56460254;56460254;56462068;56460254;56460254;56460254;56460254;56460254;56463156;56463156;56463156;56463156;56463156;56463156;56463764;56463764;56463764;56464316;56463764;56463764;56463764;56463764;56463764;56464756;56464756;56464756;56466113;56466195;56466195;56467476;56466195;56466195;564…	-;-;-;-;-;-;-;-;-;-;-;-;-;-;-;-;-;-;-;-;-;-;-;-;-;-;-;-;-;-;-;-;-;-;-;-;-;-;-;-;-;-;-;-;-;-;-;-;-;-;-;-;-;-;-;-;-;-;-;-;-;-;-;-;-;-;-;-;-;-;-;-;-;-;-;-;-;-;-;-;-;-;-;-;-;-;-;-;-;-;-;-;-;-;-;-;-;-;-;-;-;-;-;-;-;-;-;-;-;-;-;-;-;-;-;-;-;-;-;-;-;-;-;-;-;-;-;-	42341	486	323.5	1930	1459.5	-2.12375	5.93578	158.4	9.78e-11	4.72e-07
DYNC2H1	11;11;11;11;11;11;11;11;11;11;11;11;11;11;11;11;11;11;11;11;11;11;11;11;11;11;11;11;11;11;11;11;11;11;11;11;11;11;11;11;11;11;11;11;11;11;11;11;11;11;11;11;11;11;11;11;11;11;11;11;11;11;11;11;11;11;11;11;11;11;11;11;11;11;11;11;11;11;11;11;11;11;11;11;11;11;11;11;11;11;11;11;11;11;11;11;11;11;11;11;11;11;11;11;11;11;11;11;11;11;11;11;11;11;11;11;11;11;11;11;11;11;11;11;11;11;11;11;11;11;11;11;11;…	103109431;103109522;103109575;103113537;103113537;103113537;103114103;103114103;103114103;103115177;103115177;103115177;103116570;103116570;103116570;103117631;103117631;103117631;103120447;103120447;103120447;103120689;103120689;103120689;103120925;103120925;103120925;103121372;103121372;103121372;103122825;103122825;103122825;103125100;103125100;103125100;103128910;103128910;103128910;103133555…	103109769;103109769;103109769;103113707;103113707;103113707;103114238;103114238;103114238;103115295;103115295;103115295;103116714;103116714;103116714;103117863;103117863;103117863;103120581;103120581;103120581;103120802;103120802;103120802;103121036;103121036;103121036;103121496;103121496;103121496;103123000;103123000;103123000;103125295;103125295;103125295;103129005;103129005;103129005;103133707…	+;+;+;+;+;+;+;+;+;+;+;+;+;+;+;+;+;+;+;+;+;+;+;+;+;+;+;+;+;+;+;+;+;+;+;+;+;+;+;+;+;+;+;+;+;+;+;+;+;+;+;+;+;+;+;+;+;+;+;+;+;+;+;+;+;+;+;+;+;+;+;+;+;+;+;+;+;+;+;+;+;+;+;+;+;+;+;+;+;+;+;+;+;+;+;+;+;+;+;+;+;+;+;+;+;+;+;+;+;+;+;+;+;+;+;+;+;+;+;+;+;+;+;+;+;+;+;+	14284	39	19	144	101	-2.13105	2.17325	54.8818	4.76e-07	0.000237554
PCLO	7;7;7;7;7;7;7;7;7;7;7;7;7;7;7;7;7;7;7;7;7;7;7;7;7;7;7;7;7;7;7;7;7;7;7;7;7;7;7;7;7;7;7;7;7;7;7;7;7;7;7;7;7;7;7;7;7;7;7;7;7;7;7;7;7;7;7;7;7;7;7;7;7;7;7;7;7;7;7;7;7;7;7;7;7;7	82754013;82760639;82761359;82801518;82801537;82805688;82805688;82820477;82821112;82822097;82822109;82822495;82822495;82824236;82824236;82824236;82824236;82826589;82826589;82826589;82826589;82827873;82827873;82827873;82827873;82835667;82835667;82838218;82838218;82838218;82838218;82838218;82841459;82841459;82841459;82841459;82841459;82845271;82845271;82845271;82845271;82845271;82845427;82846567;828…	82758715;82760784;82761493;82801591;82801591;82805829;82805829;82822689;82821294;82822689;82822689;82822590;82822689;82824416;82824416;82824416;82824416;82826660;82826660;82826660;82826660;82827966;82827966;82827966;82827966;82835693;82835693;82838342;82838342;82838342;82838342;82838342;82841509;82841509;82841509;82841509;82841509;82845485;82845485;82845485;82845485;82845485;82845485;82846634;828…	-;-;-;-;-;-;-;-;-;-;-;-;-;-;-;-;-;-;-;-;-;-;-;-;-;-;-;-;-;-;-;-;-;-;-;-;-;-;-;-;-;-;-;-;-;-;-;-;-;-;-;-;-;-;-;-;-;-;-;-;-;-;-;-;-;-;-;-;-;-;-;-;-;-;-;-;-;-;-;-;-;-;-;-;-;-	22873	19	19	108.5	60	-2.1842	1.63988	45.3051	1.84e-06	0.000667241
ANKRD26	10;10;10;10;10;10;10;10;10;10;10;10;10;10;10;10;10;10;10;10;10;10;10;10;10;10;10;10;10;10;10;10;10;10;10;10;10;10;10;10;10;10;10;10;10;10;10;10;10;10;10;10;10;10;10;10;10;10;10;10;10;10;10;10;10;10;10;10;10;10;10;10;10;10;10;10;10;10;10;10;10;10;10;10;10;10	26991914;26995041;27004116;27004298;27005623;27006917;27006917;27006917;27012882;27012882;27012882;27014494;27014494;27014494;27017502;27017502;27022558;27022558;27024447;27024447;27028852;27028852;27029286;27029286;27033225;27033225;27034796;27034796;27037186;27037186;27037871;27037871;27037996;27039965;27039965;27039965;27043426;27043426;27043426;27044157;27044157;27044157;27046111;27046353;270…	26992005;26995147;27005723;27005723;27005723;27006962;27006962;27006962;27013110;27013110;27013110;27014711;27014679;27014711;27017792;27017792;27022687;27022687;27024559;27024559;27028945;27028945;27029356;27029356;27033377;27033377;27035752;27035752;27037323;27037323;27038054;27038054;27038054;27040178;27040178;27040178;27043567;27043567;27043567;27044190;27044190;27044190;27046293;27046523;270…	-;-;-;-;-;-;-;-;-;-;-;-;-;-;-;-;-;-;-;-;-;-;-;-;-;-;-;-;-;-;-;-;-;-;-;-;-;-;-;-;-;-;-;-;-;-;-;-;-;-;-;-;-;-;-;-;-;-;-;-;-;-;-;-;-;-;-;-;-;-;-;-;-;-;-;-;-;-;-;-;-;-;-;-;-;-	7941	49	32	231	134	-2.21888	2.72007	67.0647	1.08e-07	6.78e-05
GOLGA4	3;3;3;3;3;3;3;3;3;3;3;3;3;3;3;3;3;3;3;3;3;3;3;3;3;3;3;3;3;3;3;3;3;3;3;3;3;3;3;3;3;3;3;3;3;3;3;3;3;3;3;3;3;3;3;3;3;3;3;3;3;3;3;3;3;3;3;3;3;3;3;3;3;3;3;3;3;3;3;3;3;3;3;3;3;3;3;3;3;3;3;3;3;3;3;3;3;3;3;3;3;3;3;3;3;3;3;3;3;3;3;3;3;3;3;3;3;3;3;3;3;3;3;3;3;3;3;3;3;3	37243177;37243191;37243247;37243252;37243270;37243270;37243271;37243338;37243424;37245303;37249701;37251395;37251395;37251395;37251395;37251395;37251395;37251395;37251395;37251395;37266842;37273536;37273536;37273536;37273536;37273536;37281958;37281958;37281958;37281958;37281958;37281958;37281958;37282092;37282183;37286014;37286014;37286014;37286014;37287527;37289235;37289235;37289235;37289235;372…	37243622;37243622;37243622;37243622;37243622;37243622;37243622;37243622;37243622;37245421;37250607;37251484;37251484;37251484;37251484;37251484;37251484;37251484;37251467;37251484;37266940;37273601;37273601;37273601;37273601;37273601;37281985;37282272;37282272;37282272;37282272;37282272;37282272;37282272;37282272;37286061;37286061;37286061;37286061;37287612;37289291;37289291;37289291;37289289;372…	+;+;+;+;+;+;+;+;+;+;+;+;+;+;+;+;+;+;+;+;+;+;+;+;+;+;+;+;+;+;+;+;+;+;+;+;+;+;+;+;+;+;+;+;+;+;+;+;+;+;+;+;+;+;+;+;+;+;+;+;+;+;+;+;+;+;+;+;+;+;+;+;+;+;+;+;+;+;+;+;+;+;+;+;+;+;+;+;+;+;+;+;+;+;+;+;+;+;+;+;+;+;+;+;+;+;+;+;+;+;+;+;+;+;+;+;+;+;+;+;+;+;+;+;+;+;+;+	10737	290.5	173	1398.5	733	-2.25663	5.23835	91.6157	9.44e-09	1.37e-05
CENPF	1;1;1;1;1;1;1;1;1;1;1;1;1;1;1;1;1;1;1;1;1;1;1;1;1;1;1;1;1;1;1;1;1;1;1;1;1	214603195;214603195;214603484;214613714;214613714;214613714;214614832;214614832;214618573;214619129;214620655;214622079;214629046;214630534;214632480;214637866;214639921;214644557;214647967;214648485;214648675;214648675;214648675;214651710;214651710;214651710;214652828;214652828;214652828;214653485;214653485;214655148;214655241;214656933;214656933;214658850;214663591	214603321;214603321;214603648;214613893;214613916;214613916;214615028;214615190;214618694;214619220;214620946;214622281;214629171;214630662;214632602;214638001;214643324;214647400;214647979;214648498;214648827;214648827;214648827;214651886;214651886;214651886;214652989;214652989;214652989;214653493;214654419;214655403;214655403;214657410;214657409;214659028;214664588	+;+;+;+;+;+;+;+;+;+;+;+;+;+;+;+;+;+;+;+;+;+;+;+;+;+;+;+;+;+;+;+;+;+;+;+;+	11690	332	255	1787	972	-2.27915	5.6069	117.695	1.22e-09	3.52e-06
XXbac-BPG283O16.9	6	30282349	30286054	-	3706	17	3	62	33	-2.2911	0.828848	24.8399	7.95e-05	0.00911664
ASPM	1;1;1;1;1;1;1;1;1;1;1;1;1;1;1;1;1;1;1;1;1;1;1;1;1;1;1;1;1;1;1;1;1;1;1;1;1;1;1;1;1;1;1;1;1;1;1;1;1;1;1;1;1;1;1;1;1;1;1;1;1;1;1;1;1;1;1;1;1;1;1;1;1;1;1;1;1;1;1;1;1;1;1;1;1;1;1;1;1;1	197084128;197084128;197084132;197086803;197086803;197086803;197088205;197088256;197088256;197088256;197089930;197089930;197089930;197089930;197090196;197090196;197090196;197090196;197090850;197090850;197090850;197090850;197091907;197091907;197091907;197091907;197093052;197093052;197093052;197093052;197094084;197094084;197094084;197094084;197095998;197095998;197095998;197095998;197100431;197100431…	197084426;197084426;197084426;197086972;197086972;197086972;197088432;197088432;197088432;197088432;197090084;197090084;197090084;197090084;197090388;197090388;197090388;197090388;197091041;197091041;197091041;197091041;197092056;197092056;197092056;197092056;197093261;197093261;197093261;197093261;197094180;197094180;197094180;197094180;197096164;197096164;197096164;197096164;197102647;197105185…	-;-;-;-;-;-;-;-;-;-;-;-;-;-;-;-;-;-;-;-;-;-;-;-;-;-;-;-;-;-;-;-;-;-;-;-;-;-;-;-;-;-;-;-;-;-;-;-;-;-;-;-;-;-;-;-;-;-;-;-;-;-;-;-;-;-;-;-;-;-;-;-;-;-;-;-;-;-;-;-;-;-;-;-;-;-;-;-;-;-	10938	220	136	1060.5	618.5	-2.2923	4.89064	106.118	2.86e-09	6.56e-06
KCNQ1OT1	11	2608328	2699994	-	91667	15	9	83	45	-2.45182	1.21411	43.9754	2.26e-06	0.000761277
ANKRD12	18;18;18;18;18;18;18;18;18;18;18;18;18;18;18;18;18;18;18;18;18;18;18;18;18;18;18;18;18;18;18;18;18;18;18;18;18;18;18;18;18;18;18;18;18;18;18;18;18;18;18;18;18;18;18;18;18;18	9136228;9136777;9136796;9136805;9136839;9137563;9182382;9182382;9182382;9182382;9182382;9182382;9182382;9182386;9195551;9195551;9195551;9195551;9195551;9195551;9200514;9204476;9204476;9208657;9208657;9208657;9208657;9208657;9208657;9211584;9211584;9211584;9211584;9211584;9216758;9216758;9216758;9216758;9216780;9221852;9221852;9221852;9221852;9221852;9235638;9239477;9254211;9254211;9254211;9254211…	9136355;9136965;9137096;9136965;9136965;9137873;9182519;9182519;9182519;9182519;9182470;9182519;9182519;9182519;9195698;9195698;9195698;9195698;9195597;9195698;9200644;9204544;9204544;9208797;9208803;9208743;9208803;9208803;9208803;9211784;9211621;9211784;9211784;9211784;9216900;9216900;9216900;9216900;9216900;9221999;9221999;9221999;9221999;9221999;9235820;9239556;9256111;9254273;9258931;9258931…	+;+;+;+;+;+;+;+;+;+;+;+;+;+;+;+;+;+;+;+;+;+;+;+;+;+;+;+;+;+;+;+;+;+;+;+;+;+;+;+;+;+;+;+;+;+;+;+;+;+;+;+;+;+;+;+;+;+	12252	45.5	45.5	325.5	164	-2.46328	3.09729	77.2783	3.63e-08	3.14e-05
AKAP9	7;7;7;7;7;7;7;7;7;7;7;7;7;7;7;7;7;7;7;7;7;7;7;7;7;7;7;7;7;7;7;7;7;7;7;7;7;7;7;7;7;7;7;7;7;7;7;7;7;7;7;7;7;7;7;7;7;7;7;7;7;7;7;7;7;7;7;7;7;7;7;7;7;7;7;7;7;7;7;7;7;7;7;7;7;7;7;7;7;7;7;7;7;7;7;7;7;7;7;7;7;7;7;7;7;7;7;7;7;7;7;7;7;7;7;7;7;7;7;7;7;7;7;7;7;7;7;7;7;7;7;7;7;7;7;7;7;7;7;7;7;7;7;7;7;7;7;7;7;7;7;7;7;7;7;7;7;7;7;7;7;7;7;7;7;7;7;7;7;7;7;7;7;7;7;7;7;7;7;7;7;7;7;7;7;7;7;7;7;7;7;7;7;7;7;7;7;7;7;7…	91940867;91940916;91940916;91940926;91941100;91941100;91970473;91973690;91973692;91973711;91973711;91973711;91973711;91973711;91973711;91973756;91980289;91980289;91980289;91980289;91980289;91980289;91980289;91992158;91992158;91992158;91992158;91992158;91992158;91992885;91992885;91992885;91992885;91992885;91992885;91992885;91994621;91994621;91994621;91994621;91994621;91994621;91994621;91995603;919…	91941147;91941157;91941147;91941147;91941162;91941147;91970508;91973707;91973705;91973968;91973968;91973968;91973968;91973968;91973968;91973968;91980333;91980333;91980333;91980333;91980333;91980333;91980333;91992211;91992211;91992211;91992211;91992211;91992211;91993055;91993055;91993055;91993055;91993055;91993055;91993055;91994776;91994776;91994776;91994776;91994776;91994776;91994776;91995713;919…	+;+;+;+;+;+;+;+;+;+;+;+;+;+;+;+;+;+;+;+;+;+;+;+;+;+;+;+;+;+;+;+;+;+;+;+;+;+;+;+;+;+;+;+;+;+;+;+;+;+;+;+;+;+;+;+;+;+;+;+;+;+;+;+;+;+;+;+;+;+;+;+;+;+;+;+;+;+;+;+;+;+;+;+;+;+;+;+;+;+;+;+;+;+;+;+;+;+;+;+;+;+;+;+;+;+;+;+;+;+;+;+;+;+;+;+;+;+;+;+;+;+;+;+;+;+;+;+	18210	59	47	386	218	-2.55322	3.38435	101.068	4.27e-09	7.71e-06
HELLPAR	12	102197585	102402596	+	205012	7	10.33	65.5	36	-2.57424	0.883004	39.9174	4.34e-06	0.00102956
ANKRD36C	2;2;2;2;2;2;2;2;2;2;2;2;2;2;2;2;2;2;2;2;2;2;2;2;2;2;2;2;2;2;2;2;2;2;2;2;2;2;2;2;2;2;2;2;2;2;2;2;2;2;2;2;2;2;2;2;2;2;2;2;2;2;2;2;2;2;2;2;2;2;2;2;2;2;2;2;2;2;2;2;2;2;2;2;2;2;2;2;2;2;2;2;2;2;2;2;2;2;2;2;2;2;2;2;2;2;2;2;2;2;2;2;2;2;2;2;2;2;2;2;2;2;2;2;2;2;2;2;2;2;2;2;2;2;2;2;2;2;2;2;2;2;2;2;2;2;2;2;2;2;2;2;2;2;2;2;2;2;2;2;2;2;2;2;2;2;2;2;2;2;2;2;2;2;2;2;2;2;2;2;2;2;2;2;2;2;2;2;2;2;2;2;2;2;2;2;2;2;2;2…	95836919;95851166;95851166;95851694;95851694;95852126;95852126;95852290;95853709;95853709;95855266;95855266;95855266;95856008;95857309;95857309;95857309;95857458;95857479;95859861;95859861;95859861;95859861;95859861;95867440;95867440;95876439;95876439;95876439;95876439;95880427;95880427;95880427;95880427;95880595;95880595;95880595;95880595;95882302;95882302;95882302;95882302;95882469;95882469;958…	95837108;95851195;95851195;95851787;95851787;95852196;95852196;95853861;95853861;95853861;95856180;95856180;95855377;95856180;95857492;95857492;95857492;95857492;95857492;95860074;95860074;95859929;95860074;95860074;95867581;95867581;95876509;95876509;95876509;95876509;95880499;95880499;95880499;95880499;95880623;95880623;95880623;95880623;95882374;95882374;95882374;95882374;95882497;95882497;958…	-;-;-;-;-;-;-;-;-;-;-;-;-;-;-;-;-;-;-;-;-;-;-;-;-;-;-;-;-;-;-;-;-;-;-;-;-;-;-;-;-;-;-;-;-;-;-;-;-;-;-;-;-;-;-;-;-;-;-;-;-;-;-;-;-;-;-;-;-;-;-;-;-;-;-;-;-;-;-;-;-;-;-;-;-;-;-;-;-;-;-;-;-;-;-;-;-;-;-;-;-;-;-;-;-;-;-;-;-;-;-;-;-;-;-;-;-;-;-;-;-;-;-;-;-;-;-;-	8574	11.83	7.5	67.57	48.16	-2.61675	1.05548	53.0869	6.05e-07	0.000291828
LL22NC03-2H8.5	22	22283928	22287220	-	3293	7	4	43	24	-2.62823	0.317846	31.8747	1.83e-05	0.00327258
CENPE	4;4;4;4;4;4;4;4;4;4;4;4;4;4;4;4;4;4;4;4;4;4;4;4;4;4;4;4;4;4;4;4;4;4;4;4;4;4;4;4;4;4;4;4;4;4;4;4;4;4;4;4;4;4;4;4;4;4;4;4;4;4;4;4;4;4;4;4;4;4;4;4;4;4;4;4;4;4;4;4;4;4;4;4;4;4;4;4;4;4;4;4;4;4;4;4;4;4;4;4;4;4;4;4;4;4;4;4;4;4;4;4;4;4;4;4;4;4;4;4;4;4;4;4;4;4;4;4;4;4;4;4;4;4;4;4;4;4;4;4;4;4;4;4;4;4;4;4;4;4;4;4;4;4;4;4;4;4;4;4;4;4;4;4;4;4;4;4;4;4;4;4;4;4;4;4;4;4;4;4;4;4;4;4;4;4;4;4	103105806;103105813;103106047;103108803;103108803;103108803;103110828;103110828;103110828;103114455;103114455;103114455;103116364;103116577;103116577;103116577;103120148;103120148;103120148;103120148;103122871;103122871;103122871;103132693;103132693;103132693;103133695;103133695;103133695;103136141;103136141;103136141;103136280;103138351;103138351;103138351;103139789;103139789;103139943;103139953…	103106316;103106316;103106316;103109089;103109089;103109089;103111011;103111011;103111011;103114552;103114552;103114552;103116689;103116689;103116689;103116689;103120336;103120333;103120333;103120333;103123089;103123089;103123089;103132896;103132896;103132896;103133892;103133892;103133892;103136171;103136359;103136359;103136359;103138449;103138452;103138449;103139941;103140079;103139951;103139961…	-;-;-;-;-;-;-;-;-;-;-;-;-;-;-;-;-;-;-;-;-;-;-;-;-;-;-;-;-;-;-;-;-;-;-;-;-;-;-;-;-;-;-;-;-;-;-;-;-;-;-;-;-;-;-;-;-;-;-;-;-;-;-;-;-;-;-;-;-;-;-;-;-;-;-;-;-;-;-;-;-;-;-;-;-;-;-;-;-;-;-;-;-;-;-;-;-;-;-;-;-;-;-;-;-;-;-;-;-;-;-;-;-;-;-;-;-;-;-;-;-;-;-;-;-;-;-;-	9444	167	103	1128.5	589	-2.72106	4.85752	123.024	8.39e-10	3.04e-06
SAMD9	7;7;7;7;7;7;7	93099513;93099516;93102249;93114795;93117863;93117863;93117863	93106105;93106105;93106105;93114895;93118023;93117962;93118023	-;-;-;-;-;-;-	6855	13	6	85	45	-2.80838	1.18676	50.1628	9.06e-07	0.000385585
CCDC144CP	17;17;17;17;17;17;17;17;17;17;17;17;17;17;17;17;17;17;17;17;17;17;17;17	20321164;20321317;20324183;20324183;20335832;20335832;20338157;20339892;20342358;20342358;20348558;20350938;20351257;20357879;20362184;20362922;20365086;20367613;20391475;20392364;20394021;20400521;20401139;20402056	20321660;20321660;20324253;20324253;20338086;20336080;20338230;20340319;20342825;20342494;20348739;20350971;20351398;20358096;20362367;20363050;20366030;20367750;20391768;20392584;20394230;20400563;20401248;20403557	+;+;+;+;+;+;+;+;+;+;+;+;+;+;+;+;+;+;+;+;+;+;+;+	8145	1.5	2	25.5	18.17	-3.59622	-0.3197	34.8653	1.05e-05	0.00207168
